# Supplementary material
Source: HighWire-hosted journal article supplement (https://gut.bmj.com/content/gutjnl-2018-317178)
Supplement: inline-supplementary-material-11 [file inline-supplementary-material-11.xls]

## Sheet: Supplementary table 7
Supplementary table 7: Correlations values within fungal familes in discovery cohort_Control
Otuid_1	Otuid_2	Correlation_coefficient	P_value	Q_value
Otu371	Otu438	0.530952	0	0
Otu319	Otu438	0.501589	0	0
Otu340	Otu391	0.448104	0	0
Otu333	Otu378	0.432798	0	0
Otu340	Otu450	0.420752	0	0
Otu339	Otu368	0.398447	0	0
Otu366	Otu378	0.398362	2e-05	0.000324
Otu337	Otu361	0.387695	6e-05	0.000849
Otu341	Otu371	0.385858	2e-05	0.000324
Otu392	Otu444	0.380405	0	0
Otu382	Otu436	0.376216	2e-05	0.000324
Otu374	Otu440	0.370182	4e-05	0.000601
Otu373	Otu445	0.361532	0	0
Otu373	Otu411	0.360694	0	0
Otu333	Otu440	0.360467	0.00026	0.002768
Otu333	Otu337	0.355441	0.00078	0.006539
Otu378	Otu440	0.348024	0.00032	0.003277
Otu337	Otu378	0.347879	0.00064	0.005622
Otu366	Otu440	0.344235	0.00036	0.003581
Otu339	Otu377	0.342605	0	0
Otu340	Otu384	0.336833	0	0
Otu346	Otu378	0.335572	0.00018	0.002074
Otu333	Otu344	0.334368	0.0003	0.003111
Otu333	Otu366	0.33393	0.00054	0.004903
Otu366	Otu374	0.332605	0.00014	0.001699
Otu341	Otu347	0.329979	8e-05	0.001073
Otu341	Otu367	0.328406	0.0001	0.001285
Otu382	Otu442	0.318657	4e-05	0.000601
Otu319	Otu367	0.312365	0.00048	0.004478
Otu344	Otu366	0.312285	0.0008	0.006671
Otu397	Otu423	0.312275	0	0
Otu371	Otu375	0.310046	0.00026	0.002768
Otu340	Otu379	0.307308	2e-05	0.000324
Otu308	Otu312	0.307137	0	0
Otu333	Otu374	0.306394	0.00056	0.005049
Otu361	Otu378	0.304952	0.00134	0.009958
Otu344	Otu440	0.3034	0.00118	0.009041
Otu398	Otu427	0.302961	0	0
Otu416	Otu431	0.300455	0	0
Otu384	Otu450	0.299909	2e-05	0.000324
Otu319	Otu342	0.297701	0.00118	0.009041
Otu354	Otu363	0.297571	0.00012	0.001497
Otu361	Otu440	0.296833	0.0014	0.010284
Otu370	Otu386	0.296779	0	0
Otu384	Otu391	0.295444	0	0
Otu332	Otu370	0.294308	0	0
Otu360	Otu451	0.294226	0.00028	0.002943
Otu337	Otu451	0.291964	0.00168	0.011772
Otu315	Otu444	0.290919	0.00024	0.002599
Otu341	Otu438	0.290413	0.0008	0.006671
Otu308	Otu309	0.289689	0	0
Otu391	Otu450	0.287779	0.00012	0.001497
Otu308	Otu314	0.287525	0	0
Otu308	Otu416	0.28722	0	0
Otu308	Otu398	0.285865	0	0
Otu345	Otu388	0.285413	0	0
Otu416	Otu426	0.285008	0	0
Otu388	Otu398	0.284214	0	0
Otu318	Otu427	0.283407	0	0
Otu319	Otu375	0.283384	0.00078	0.006539
Otu358	Otu431	0.281887	0	0
Otu344	Otu448	0.281687	0.00108	0.008473
Otu327	Otu440	0.281239	0.00228	0.014794
Otu421	Otu435	0.279999	0	0
Otu398	Otu421	0.279699	0	0
Otu398	Otu426	0.279064	0	0
Otu308	Otu388	0.27895	0	0
Otu322	Otu396	0.27881	0.0003	0.003111
Otu392	Otu442	0.276593	0.00014	0.001699
Otu442	Otu444	0.275774	0.00038	0.003735
Otu312	Otu398	0.27549	0	0
Otu312	Otu435	0.275387	0	0
Otu333	Otu346	0.275363	0.00214	0.014128
Otu308	Otu421	0.275156	0	0
Otu347	Otu367	0.274828	0.00162	0.011471
Otu365	Otu374	0.274459	0.00158	0.011267
Otu421	Otu426	0.27436	0	0
Otu416	Otu424	0.27355	0	0
Otu344	Otu390	0.27318	0.00126	0.009514
Otu416	Otu421	0.272772	0	0
Otu358	Otu435	0.271728	0	0
Otu419	Otu442	0.271178	0.00036	0.003581
Otu309	Otu345	0.270164	0	0
Otu445	Otu448	0.270119	0.00104	0.008234
Otu359	Otu361	0.269918	0.00234	0.015066
Otu388	Otu427	0.269904	0	0
Otu388	Otu421	0.269354	0	0
Otu322	Otu351	0.269348	0.00054	0.004903
Otu345	Otu416	0.269148	0	0
Otu372	Otu391	0.268131	0.00012	0.001497
Otu364	Otu452	0.267949	0.00278	0.017169
Otu402	Otu427	0.267867	0	0
Otu342	Otu371	0.267395	0.00318	0.019039
Otu308	Otu427	0.267353	0	0
Otu383	Otu446	0.267263	0.00018	0.002074
Otu337	Otu452	0.26714	0.00558	0.028949
Otu407	Otu416	0.267073	0	0
Otu345	Otu421	0.266682	0	0
Otu309	Otu318	0.266601	0	0
Otu345	Otu426	0.266009	0	0
Otu312	Otu343	0.265799	0	0
Otu416	Otu418	0.265565	0	0
Otu364	Otu366	0.265415	0.00318	0.019039
Otu320	Otu373	0.264897	0.00028	0.002943
Otu394	Otu421	0.264629	0	0
Otu332	Otu386	0.264216	0.00012	0.001497
Otu309	Otu416	0.264082	0	0
Otu349	Otu391	0.263176	0	0
Otu306	Otu452	0.263	0.00576	0.029678
Otu358	Otu426	0.262958	0	0
Otu361	Otu451	0.262886	0.00346	0.020276
Otu398	Otu431	0.262877	0	0
Otu331	Otu451	0.262371	0.00054	0.004903
Otu308	Otu407	0.261474	0	0
Otu308	Otu401	0.261431	0	0
Otu336	Otu367	0.261346	0.00134	0.009958
Otu393	Otu427	0.261002	0	0
Otu318	Otu416	0.260838	0	0
Otu317	Otu423	0.2608	0	0
Otu398	Otu418	0.260642	0	0
Otu314	Otu421	0.260453	0	0
Otu327	Otu331	0.260143	0.00098	0.00785
Otu333	Otu361	0.260083	0.00528	0.027805
Otu364	Otu378	0.25961	0.0037	0.021333
Otu308	Otu345	0.259453	0	0
Otu312	Otu394	0.259412	0	0
Otu373	Otu375	0.259299	0.00068	0.005889
Otu426	Otu431	0.258944	0	0
Otu312	Otu393	0.258888	0	0
Otu326	Otu398	0.25834	0	0
Otu308	Otu318	0.258272	0	0
Otu393	Otu435	0.258223	0	0
Otu314	Otu426	0.257598	0	0
Otu385	Otu443	0.257304	0	0
Otu346	Otu366	0.25711	0.00322	0.019226
Otu345	Otu435	0.256831	0	0
Otu319	Otu341	0.256277	0.00306	0.018477
Otu309	Otu398	0.256136	0	0
Otu359	Otu451	0.25613	0.0033	0.01959
Otu369	Otu450	0.255638	0.00024	0.002599
Otu312	Otu416	0.255566	0	0
Otu420	Otu443	0.254611	0	0
Otu398	Otu429	0.254095	0	0
Otu344	Otu346	0.254058	0.00316	0.018941
Otu308	Otu449	0.253635	0	0
Otu388	Otu431	0.253284	0	0
Otu345	Otu398	0.2531	0	0
Otu412	Otu414	0.253022	0	0
Otu332	Otu438	0.252973	0.0014	0.010284
Otu330	Otu449	0.252782	0	0
Otu416	Otu435	0.252309	0	0
Otu345	Otu401	0.252143	0	0
Otu361	Otu365	0.251861	0.00538	0.028195
Otu388	Otu393	0.251799	0	0
Otu411	Otu445	0.251571	0.00124	0.009396
Otu312	Otu421	0.250747	0	0
Otu342	Otu438	0.250722	0.00456	0.024987
Otu365	Otu368	0.250713	0.00176	0.012185
Otu343	Otu427	0.250453	0	0
Otu407	Otu421	0.250163	0	0
Otu341	Otu346	0.250154	0.00316	0.018941
Otu351	Otu374	0.249504	0.0027	0.016786
Otu338	Otu345	0.249357	0	0
Otu314	Otu345	0.249332	0	0
Otu364	Otu440	0.249187	0.00562	0.029121
Otu312	Otu427	0.24895	0	0
Otu312	Otu414	0.248872	0	0
Otu315	Otu392	0.248868	0.00154	0.011068
Otu407	Otu431	0.248645	0	0
Otu371	Otu378	0.248591	0.00608	0.030847
Otu353	Otu431	0.248499	0	0
Otu402	Otu439	0.248497	0	0
Otu309	Otu312	0.24846	0	0
Otu345	Otu358	0.248206	0	0
Otu381	Otu391	0.247514	0.00014	0.001699
Otu424	Otu428	0.246689	0	0
Otu414	Otu421	0.24647	0	0
Otu415	Otu432	0.24606	0	0
Otu375	Otu438	0.246055	0.00322	0.019226
Otu415	Otu453	0.2459	0	0
Otu393	Otu394	0.245634	0	0
Otu315	Otu419	0.245176	0.00136	0.01006
Otu314	Otu416	0.245151	0	0
Otu438	Otu445	0.245035	0.00444	0.024488
Otu318	Otu345	0.24503	0	0
Otu358	Otu427	0.244865	0	0
Otu312	Otu345	0.244765	0	0
Otu357	Otu438	0.244713	0.00378	0.021671
Otu345	Otu449	0.244618	0	0
Otu393	Otu398	0.244548	0	0
Otu441	Otu453	0.244402	0	0
Otu371	Otu390	0.244374	0.00434	0.024075
Otu407	Otu426	0.244356	0	0
Otu427	Otu435	0.24415	0	0
Otu414	Otu416	0.243503	0	0
Otu312	Otu402	0.243408	0	0
Otu318	Otu418	0.243314	0	0
Otu312	Otu318	0.243273	0	0
Otu318	Otu398	0.243202	0	0
Otu309	Otu418	0.24305	0	0
Otu423	Otu427	0.242986	0	0
Otu344	Otu364	0.242985	0.00626	0.031518
Otu358	Otu416	0.242956	0	0
Otu314	Otu427	0.242882	0	0
Otu368	Otu377	0.242704	0.00096	0.007717
Otu421	Otu431	0.242669	0	0
Otu353	Otu413	0.242572	0	0
Otu421	Otu427	0.242414	0	0
Otu330	Otu398	0.242101	0	0
Otu418	Otu427	0.242071	0	0
Otu335	Otu418	0.24201	0	0
Otu330	Otu416	0.241989	0	0
Otu314	Otu318	0.241976	0	0
Otu312	Otu314	0.241963	0	0
Otu318	Otu443	0.241688	0	0
Otu401	Otu439	0.241637	0	0
Otu402	Otu423	0.241138	0	0
Otu345	Otu427	0.241019	0	0
Otu393	Otu416	0.240639	0	0
Otu307	Otu316	0.240553	0.0003	0.003111
Otu433	Otu450	0.240462	0.00024	0.002599
Otu344	Otu378	0.239815	0.0072	0.034874
Otu425	Otu443	0.239702	2e-05	0.000324
Otu402	Otu407	0.23927	0	0
Otu309	Otu427	0.239194	0	0
Otu309	Otu431	0.239147	0	0
Otu345	Otu407	0.23866	0	0
Otu318	Otu449	0.238528	0	0
Otu391	Otu422	0.238468	6e-05	0.000849
Otu424	Otu431	0.238212	0	0
Otu314	Otu435	0.237887	0	0
Otu358	Otu421	0.237736	0	0
Otu318	Otu394	0.23771	0	0
Otu341	Otu364	0.23761	0.00548	0.028584
Otu385	Otu426	0.237333	0	0
Otu315	Otu436	0.237261	0.00334	0.019759
Otu368	Otu374	0.237238	0.0021	0.013946
Otu324	Otu433	0.237204	0.0003	0.003111
Otu337	Otu365	0.237193	0.0101	0.044035
Otu333	Otu364	0.236952	0.00866	0.039688
Otu330	Otu345	0.23693	0	0
Otu388	Otu426	0.236912	0	0
Otu319	Otu323	0.236889	0.0051	0.027142
Otu356	Otu426	0.23678	0	0
Otu312	Otu431	0.23675	0	0
Otu314	Otu407	0.236721	0	0
Otu394	Otu427	0.236516	0	0
Otu363	Otu375	0.236478	0.00402	0.022723
Otu319	Otu346	0.236345	0.00722	0.034929
Otu398	Otu407	0.23634	0	0
Otu318	Otu407	0.236337	0	0
Otu416	Otu428	0.235762	0	0
Otu345	Otu393	0.235302	0	0
Otu313	Otu426	0.235138	0	0
Otu318	Otu330	0.234773	0	0
Otu418	Otu435	0.234659	0	0
Otu358	Otu413	0.234656	0	0
Otu341	Otu375	0.234614	0.00354	0.020627
Otu312	Otu407	0.234529	0	0
Otu361	Otu452	0.234435	0.00896	0.040573
Otu367	Otu410	0.234359	0.0019	0.012916
Otu344	Otu374	0.234306	0.00588	0.030121
Otu407	Otu427	0.234083	0	0
Otu350	Otu368	0.233986	2e-05	0.000324
Otu318	Otu414	0.233586	0	0
Otu318	Otu385	0.233538	0	0
Otu308	Otu431	0.233403	0	0
Otu345	Otu394	0.233211	0	0
Otu319	Otu327	0.233098	0.00926	0.041481
Otu324	Otu409	0.232578	0.0005	0.004625
Otu358	Otu407	0.232573	0	0
Otu352	Otu413	0.232347	2e-05	0.000324
Otu343	Otu443	0.23234	0	0
Otu376	Otu390	0.232147	0.00464	0.025308
Otu393	Otu431	0.232044	0	0
Otu318	Otu435	0.231901	0	0
Otu312	Otu388	0.231656	0	0
Otu421	Otu424	0.231628	0	0
Otu319	Otu347	0.231505	0.00754	0.035973
Otu308	Otu402	0.231391	0	0
Otu393	Otu397	0.231038	0	0
Otu315	Otu442	0.230985	0.00412	0.023152
Otu338	Otu417	0.230927	0	0
Otu358	Otu449	0.230836	0	0
Otu307	Otu358	0.230475	0	0
Otu307	Otu427	0.230475	0	0
Otu319	Otu371	0.23019	0.01048	0.045163
Otu375	Otu445	0.230117	0.00384	0.021913
Otu308	Otu414	0.230102	0	0
Otu416	Otu443	0.230067	0	0
Otu351	Otu442	0.229977	0.00468	0.025467
Otu378	Otu451	0.229301	0.00914	0.041106
Otu309	Otu393	0.229289	0	0
Otu312	Otu426	0.229245	0	0
Otu353	Otu416	0.229048	0	0
Otu426	Otu427	0.229027	0	0
Otu415	Otu423	0.228992	2e-05	0.000324
Otu308	Otu435	0.22888	0	0
Otu308	Otu358	0.228589	0	0
Otu345	Otu357	0.228511	0	0
Otu351	Otu396	0.228414	0.00526	0.027736
Otu337	Otu364	0.228409	0.01152	0.048317
Otu345	Otu429	0.228393	0	0
Otu358	Otu393	0.22839	0	0
Otu334	Otu414	0.228386	0	0
Otu416	Otu423	0.228295	0	0
Otu377	Otu436	0.228254	0.00306	0.018477
Otu388	Otu416	0.228253	0	0
Otu391	Otu395	0.228139	0.00272	0.016881
Otu407	Otu424	0.227952	0	0
Otu344	Otu371	0.227863	0.0098	0.043058
Otu308	Otu394	0.227679	0	0
Otu318	Otu338	0.22699	0	0
Otu311	Otu422	0.226988	0	0
Otu389	Otu427	0.226973	0	0
Otu382	Otu444	0.226886	0.00254	0.016036
Otu314	Otu398	0.226814	0	0
Otu318	Otu431	0.226791	0	0
Otu342	Otu452	0.226764	0.00942	0.041919
Otu342	Otu451	0.226737	0.00812	0.037988
Otu378	Otu390	0.226725	0.00798	0.037491
Otu339	Otu404	0.226441	0.0005	0.004625
Otu401	Otu407	0.226069	0	0
Otu401	Otu443	0.225901	0	0
Otu353	Otu358	0.225864	0	0
Otu357	Otu412	0.225816	0	0
Otu388	Otu429	0.22568	0	0
Otu400	Otu443	0.225643	2e-05	0.000324
Otu428	Otu431	0.225586	0	0
Otu428	Otu439	0.225552	0	0
Otu420	Otu444	0.225399	0.00042	0.004026
Otu311	Otu398	0.225151	0	0
Otu407	Otu414	0.225149	0	0
Otu388	Otu400	0.225098	0	0
Otu397	Otu427	0.224949	0	0
Otu308	Otu397	0.224904	0	0
Otu318	Otu388	0.224837	0	0
Otu359	Otu438	0.224783	0.00864	0.039628
Otu354	Otu415	0.224604	0.00012	0.001497
Otu398	Otu403	0.224302	0	0
Otu316	Otu317	0.224225	0.00054	0.004903
Otu437	Otu449	0.22419	2e-05	0.000324
Otu416	Otu417	0.22417	0	0
Otu413	Otu443	0.224113	0	0
Otu365	Otu366	0.223981	0.01198	0.049691
Otu428	Otu430	0.223968	0	0
Otu423	Otu431	0.223822	0	0
Otu338	Otu426	0.223803	0	0
Otu394	Otu431	0.223736	0	0
Otu318	Otu401	0.223693	0	0
Otu324	Otu326	0.223622	0.00012	0.001497
Otu431	Otu449	0.223596	0	0
Otu394	Otu407	0.22348	0	0
Otu427	Otu429	0.223352	0	0
Otu357	Otu449	0.223287	4e-05	0.000601
Otu426	Otu453	0.223174	0	0
Otu435	Otu441	0.223095	0	0
Otu350	Otu449	0.222996	0	0
Otu308	Otu412	0.222772	0	0
Otu407	Otu413	0.222636	0	0
Otu357	Otu371	0.22222	0.006	0.030556
Otu308	Otu423	0.221893	0	0
Otu359	Otu395	0.221613	0.00798	0.037491
Otu401	Otu426	0.221563	0	0
Otu336	Otu347	0.221511	0.0066	0.032732
Otu357	Otu443	0.221473	0.00034	0.003429
Otu443	Otu449	0.221227	2e-05	0.000324
Otu311	Otu416	0.221134	0	0
Otu358	Otu428	0.220643	0	0
Otu367	Otu452	0.220569	0.01002	0.043787
Otu394	Otu401	0.220408	0	0
Otu397	Otu431	0.220298	0	0
Otu421	Otu428	0.22021	0	0
Otu327	Otu451	0.220199	0.01102	0.046803
Otu308	Otu418	0.220039	0	0
Otu397	Otu418	0.219989	0	0
Otu353	Otu356	0.219935	2e-05	0.000324
Otu309	Otu397	0.219881	0	0
Otu353	Otu385	0.219512	4e-05	0.000601
Otu335	Otu437	0.219512	0	0
Otu318	Otu393	0.219426	0	0
Otu309	Otu435	0.219337	0	0
Otu358	Otu394	0.219301	0	0
Otu317	Otu401	0.21915	0	0
Otu340	Otu369	0.218997	0.0014	0.010284
Otu353	Otu414	0.218991	0	0
Otu398	Otu435	0.218804	0	0
Otu398	Otu401	0.218633	0	0
Otu341	Otu374	0.218515	0.00634	0.031776
Otu335	Otu385	0.218336	0	0
Otu359	Otu450	0.218073	0.0072	0.034874
Otu426	Otu441	0.218009	0	0
Otu307	Otu428	0.217719	2e-05	0.000324
Otu353	Otu449	0.217241	0	0
Otu358	Otu385	0.217145	0	0
Otu312	Otu424	0.217135	0	0
Otu318	Otu430	0.217046	0	0
Otu338	Otu388	0.217025	0	0
Otu308	Otu393	0.216919	0	0
Otu309	Otu412	0.216834	0	0
Otu309	Otu421	0.216814	0	0
Otu342	Otu376	0.21651	0.00966	0.042625
Otu385	Otu416	0.216386	0	0
Otu415	Otu449	0.216271	0	0
Otu397	Otu426	0.216185	0	0
Otu318	Otu426	0.215636	0	0
Otu398	Otu416	0.2156	0	0
Otu368	Otu371	0.215569	0.00676	0.033307
Otu308	Otu426	0.215524	0	0
Otu374	Otu377	0.215487	0.00522	0.027602
Otu421	Otu439	0.215476	0	0
Otu338	Otu421	0.21541	0	0
Otu388	Otu418	0.215396	0	0
Otu402	Otu453	0.215339	0	0
Otu308	Otu326	0.215269	0	0
Otu406	Otu420	0.215229	0.0001	0.001285
Otu345	Otu418	0.215133	0	0
Otu407	Otu441	0.215129	0	0
Otu309	Otu394	0.215118	0	0
Otu427	Otu437	0.214967	0	0
Otu321	Otu390	0.214855	0.00336	0.019848
Otu330	Otu421	0.214813	0	0
Otu318	Otu421	0.214729	0	0
Otu358	Otu423	0.214682	0	0
Otu393	Otu407	0.214602	0	0
Otu319	Otu446	0.214555	0.0051	0.027142
Otu418	Otu421	0.214451	0	0
Otu308	Otu429	0.214339	0	0
Otu319	Otu332	0.214321	0.00604	0.030694
Otu394	Otu414	0.214254	0	0
Otu332	Otu450	0.214244	0.00268	0.016699
Otu318	Otu397	0.2142	0	0
Otu353	Otu443	0.214072	0.0001	0.001285
Otu332	Otu367	0.214024	0.00372	0.02141
Otu320	Otu445	0.214008	0.0043	0.023916
Otu418	Otu441	0.213952	0	0
Otu311	Otu427	0.21375	0	0
Otu394	Otu397	0.213467	0	0
Otu311	Otu441	0.213434	2e-05	0.000324
Otu340	Otu428	0.213385	6e-05	0.000849
Otu402	Otu428	0.213178	0	0
Otu415	Otu426	0.213161	2e-05	0.000324
Otu385	Otu427	0.21284	0	0
Otu391	Otu428	0.212777	4e-05	0.000601
Otu414	Otu426	0.212477	0	0
Otu343	Otu398	0.212437	0	0
Otu416	Otu427	0.212212	0	0
Otu309	Otu388	0.212083	0	0
Otu358	Otu398	0.212048	0	0
Otu322	Otu365	0.212026	0.008	0.037563
Otu326	Otu428	0.211969	2e-05	0.000324
Otu400	Otu414	0.211956	0	0
Otu441	Otu443	0.211918	4e-05	0.000601
Otu398	Otu453	0.211876	0	0
Otu382	Otu392	0.211874	0.00406	0.022894
Otu307	Otu397	0.211818	8e-05	0.001073
Otu423	Otu449	0.211684	0	0
Otu326	Otu421	0.211642	0	0
Otu334	Otu355	0.211634	0.00034	0.003429
Otu309	Otu426	0.211607	0	0
Otu407	Otu428	0.211582	0	0
Otu427	Otu443	0.211428	0	0
Otu393	Otu423	0.211347	0	0
Otu424	Otu449	0.211324	0	0
Otu318	Otu429	0.211265	0	0
Otu313	Otu330	0.211256	0	0
Otu343	Otu388	0.211186	0	0
Otu318	Otu423	0.211179	0	0
Otu388	Otu449	0.21106	0	0
Otu343	Otu393	0.210965	0	0
Otu309	Otu402	0.21088	0	0
Otu323	Otu438	0.210875	0.01106	0.046927
Otu407	Otu435	0.210872	0	0
Otu426	Otu435	0.210872	0	0
Otu314	Otu431	0.210802	0	0
Otu391	Otu447	0.210754	0.00164	0.011569
Otu413	Otu426	0.210745	2e-05	0.000324
Otu338	Otu358	0.21069	0	0
Otu391	Otu423	0.210486	0.00026	0.002768
Otu313	Otu424	0.210463	0	0
Otu312	Otu358	0.210113	0	0
Otu394	Otu416	0.21003	0	0
Otu414	Otu427	0.209801	0	0
Otu346	Otu448	0.20977	0.01036	0.044789
Otu424	Otu435	0.209611	0	0
Otu345	Otu423	0.209364	0	0
Otu397	Otu449	0.209306	0	0
Otu388	Otu402	0.209227	0	0
Otu312	Otu353	0.209078	0	0
Otu350	Otu421	0.208854	0	0
Otu384	Otu428	0.208725	0	0
Otu315	Otu382	0.208721	0.00672	0.03315
Otu309	Otu358	0.208577	0	0
Otu353	Otu400	0.208451	0.00032	0.003277
Otu384	Otu431	0.20838	0	0
Otu314	Otu412	0.208298	0	0
Otu416	Otu441	0.208156	0	0
Otu431	Otu435	0.208079	0	0
Otu326	Otu393	0.207947	0	0
Otu312	Otu449	0.207914	0	0
Otu340	Otu439	0.207727	0.0002	0.002256
Otu401	Otu416	0.2077	0	0
Otu414	Otu430	0.207591	0	0
Otu307	Otu435	0.207546	0	0
Otu385	Otu431	0.207545	0	0
Otu358	Otu397	0.207444	0	0
Otu374	Otu390	0.207365	0.00946	0.042027
Otu342	Otu442	0.207241	0.011	0.046749
Otu330	Otu388	0.20717	0	0
Otu393	Otu421	0.207056	0	0
Otu405	Otu418	0.206886	0	0
Otu337	Otu360	0.206846	0.01068	0.045771
Otu401	Otu421	0.206681	0	0
Otu318	Otu358	0.206639	0	0
Otu318	Otu329	0.206585	0	0
Otu397	Otu402	0.206488	0	0
Otu330	Otu431	0.206473	0	0
Otu407	Otu418	0.206423	0	0
Otu358	Otu388	0.206414	0	0
Otu314	Otu326	0.206368	0	0
Otu367	Otu383	0.206359	0.00744	0.035649
Otu401	Otu402	0.206234	0	0
Otu407	Otu417	0.205857	0	0
Otu312	Otu338	0.205828	0	0
Otu355	Otu388	0.205817	0	0
Otu334	Otu406	0.205634	0.0002	0.002256
Otu304	Otu391	0.205606	0.0008	0.006671
Otu413	Otu449	0.205529	0	0
Otu331	Otu339	0.205521	0.00256	0.016143
Otu394	Otu398	0.205493	0	0
Otu319	Otu389	0.205434	0.00204	0.013638
Otu388	Otu424	0.205433	0	0
Otu345	Otu417	0.205408	0	0
Otu385	Otu388	0.20534	0	0
Otu416	Otu429	0.205109	0	0
Otu308	Otu428	0.205065	0	0
Otu314	Otu393	0.205027	0	0
Otu426	Otu429	0.20499	0	0
Otu402	Otu441	0.204691	0	0
Otu314	Otu401	0.204599	0	0
Otu352	Otu357	0.204432	0.0017	0.011864
Otu309	Otu338	0.204403	0	0
Otu340	Otu395	0.204341	0.00776	0.036747
Otu326	Otu449	0.204248	0	0
Otu350	Otu435	0.204227	0	0
Otu388	Otu423	0.204186	0	0
Otu388	Otu433	0.204135	0	0
Otu309	Otu326	0.204116	0	0
Otu321	Otu371	0.203756	0.00734	0.035322
Otu398	Otu402	0.203628	0	0
Otu417	Otu424	0.203493	0	0
Otu401	Otu403	0.203202	0	0
Otu441	Otu449	0.203019	0	0
Otu308	Otu385	0.202951	0	0
Otu384	Otu423	0.202835	0.0003	0.003111
Otu330	Otu423	0.20274	0	0
Otu331	Otu338	0.20266	0.00038	0.003735
Otu379	Otu397	0.202659	8e-05	0.001073
Otu326	Otu405	0.202628	0.00012	0.001497
Otu320	Otu411	0.202591	0.00452	0.024818
Otu394	Otu435	0.202519	0	0
Otu422	Otu435	0.202433	0	0
Otu308	Otu439	0.202361	0	0
Otu312	Otu418	0.202284	0	0
Otu435	Otu453	0.202121	0	0
Otu308	Otu311	0.202082	0	0
Otu414	Otu424	0.202033	0	0
Otu318	Otu424	0.202012	0	0
Otu314	Otu385	0.201978	0	0
Otu411	Otu423	0.201847	0.001	0.00798
Otu437	Otu438	0.201534	0.00288	0.017642
Otu407	Otu423	0.2014	0	0
Otu416	Otu420	0.201394	0	0
Otu355	Otu423	0.201321	0.00014	0.001699
Otu340	Otu433	0.201304	0.00148	0.010721
Otu326	Otu407	0.20126	0	0
Otu355	Otu435	0.201232	0	0
Otu412	Otu413	0.201093	0	0
Otu435	Otu449	0.201023	0	0
Otu402	Otu421	0.200857	0	0
Otu330	Otu394	0.200657	0	0
Otu338	Otu435	0.200596	0	0
Otu379	Otu423	0.200506	0.0007	0.006026
Otu423	Otu426	0.200473	2e-05	0.000324
Otu393	Otu428	0.200225	0	0
Otu402	Otu416	0.200108	0	0
Otu412	Otu421	0.200098	0	0
Otu360	Otu370	0.199806	0.00736	0.035385
Otu417	Otu426	0.199762	0	0
Otu358	Otu429	0.199759	0	0
Otu397	Otu435	0.199589	0	0
Otu415	Otu439	0.199586	6e-05	0.000849
Otu311	Otu418	0.199394	0	0
Otu369	Otu433	0.199353	0.00134	0.009958
Otu318	Otu412	0.199254	0	0
Otu329	Otu445	0.19924	0.002	0.013442
Otu330	Otu424	0.199187	0	0
Otu343	Otu416	0.199161	0	0
Otu418	Otu424	0.199126	0	0
Otu372	Otu380	0.199111	0.00384	0.021913
Otu314	Otu402	0.19893	0	0
Otu330	Otu426	0.198881	0	0
Otu330	Otu355	0.198835	4e-05	0.000601
Otu417	Otu435	0.198755	0	0
Otu312	Otu384	0.198714	0	0
Otu307	Otu384	0.198683	0.00136	0.01006
Otu388	Otu391	0.198672	0	0
Otu392	Otu436	0.198629	0.00798	0.037491
Otu394	Otu424	0.198532	0	0
Otu340	Otu359	0.198512	0.01124	0.047502
Otu308	Otu313	0.198494	0	0
Otu345	Otu412	0.198491	0	0
Otu309	Otu314	0.198465	0	0
Otu409	Otu418	0.198312	0	0
Otu313	Otu388	0.19826	0	0
Otu406	Otu421	0.198127	0	0
Otu367	Otu446	0.197925	0.0061	0.030915
Otu388	Otu435	0.197838	0	0
Otu330	Otu414	0.197793	0	0
Otu329	Otu443	0.197734	0.0002	0.002256
Otu397	Otu416	0.197502	0	0
Otu358	Otu401	0.197442	0	0
Otu311	Otu397	0.197416	4e-05	0.000601
Otu312	Otu412	0.197387	0	0
Otu358	Otu415	0.197283	0	0
Otu349	Otu415	0.19728	0.00024	0.002599
Otu428	Otu435	0.197263	0	0
Otu353	Otu407	0.197216	0	0
Otu405	Otu412	0.197096	2e-05	0.000324
Otu345	Otu402	0.197079	0	0
Otu412	Otu437	0.196756	0	0
Otu385	Otu394	0.19673	0	0
Otu309	Otu385	0.196699	0	0
Otu345	Otu350	0.196469	0	0
Otu345	Otu422	0.196469	0	0
Otu413	Otu430	0.196395	4e-05	0.000601
Otu309	Otu441	0.196306	0	0
Otu354	Otu430	0.196187	0.00176	0.012185
Otu311	Otu421	0.196184	0	0
Otu393	Otu429	0.196102	0	0
Otu330	Otu402	0.196078	0	0
Otu409	Otu424	0.196066	0.0001	0.001285
Otu424	Otu441	0.195982	0	0
Otu398	Otu420	0.195723	0	0
Otu362	Otu396	0.195721	0.00344	0.020186
Otu416	Otu453	0.195706	0	0
Otu353	Otu425	0.195697	0.00092	0.007461
Otu401	Otu431	0.19555	0	0
Otu326	Otu431	0.19553	0	0
Otu305	Otu430	0.195356	0.00042	0.004026
Otu312	Otu406	0.195303	0	0
Otu391	Otu405	0.195083	0.00156	0.011171
Otu350	Otu443	0.195073	0.0001	0.001285
Otu397	Otu421	0.195056	0	0
Otu326	Otu406	0.195053	0.0001	0.001285
Otu307	Otu393	0.194922	0	0
Otu318	Otu353	0.1949	2e-05	0.000324
Otu421	Otu422	0.194697	0	0
Otu422	Otu450	0.194615	0.00124	0.009396
Otu355	Otu409	0.194597	0.0007	0.006026
Otu409	Otu432	0.194546	0.00036	0.003581
Otu418	Otu431	0.194356	0	0
Otu426	Otu439	0.194325	2e-05	0.000324
Otu338	Otu343	0.194286	2e-05	0.000324
Otu308	Otu384	0.194269	0	0
Otu308	Otu310	0.194247	0	0
Otu414	Otu435	0.194215	0	0
Otu419	Otu444	0.194159	0.00692	0.033894
Otu398	Otu424	0.194095	0	0
Otu353	Otu427	0.193982	0	0
Otu405	Otu431	0.193977	0	0
Otu355	Otu416	0.19397	0	0
Otu348	Otu431	0.193923	0	0
Otu358	Otu417	0.193557	0	0
Otu407	Otu449	0.19351	0	0
Otu326	Otu453	0.193467	0	0
Otu407	Otu429	0.193467	0	0
Otu385	Otu435	0.193416	0	0
Otu320	Otu349	0.193375	0.0009	0.007339
Otu412	Otu427	0.193355	0	0
Otu427	Otu431	0.193312	0	0
Otu394	Otu418	0.193308	0	0
Otu407	Otu415	0.193275	0	0
Otu358	Otu412	0.193233	0	0
Otu307	Otu416	0.193221	0	0
Otu385	Otu429	0.193173	2e-05	0.000324
Otu393	Otu401	0.192994	0	0
Otu428	Otu453	0.192885	2e-05	0.000324
Otu407	Otu437	0.192786	0	0
Otu308	Otu424	0.192709	0	0
Otu311	Otu345	0.192707	0	0
Otu417	Otu431	0.192701	0	0
Otu394	Otu449	0.19268	0	0
Otu350	Otu401	0.192546	0	0
Otu388	Otu397	0.192222	0	0
Otu326	Otu403	0.192155	6e-05	0.000849
Otu402	Otu426	0.192125	0	0
Otu403	Otu441	0.192075	2e-05	0.000324
Otu326	Otu441	0.192023	2e-05	0.000324
Otu397	Otu407	0.192008	0	0
Otu431	Otu437	0.191945	0	0
Otu388	Otu413	0.191942	0	0
Otu353	Otu421	0.191786	0	0
Otu426	Otu443	0.191741	6e-05	0.000849
Otu398	Otu417	0.191624	0	0
Otu309	Otu424	0.191597	0	0
Otu393	Otu453	0.19156	0	0
Otu332	Otu349	0.191371	0.00068	0.005889
Otu326	Otu420	0.191333	0.00036	0.003581
Otu412	Otu449	0.191296	0	0
Otu415	Otu443	0.191105	0.00056	0.005049
Otu384	Otu429	0.191102	0.00046	0.004322
Otu413	Otu421	0.191013	0	0
Otu350	Otu388	0.190978	0	0
Otu353	Otu428	0.190975	0.00012	0.001497
Otu309	Otu335	0.190948	0	0
Otu402	Otu422	0.190938	2e-05	0.000324
Otu345	Otu414	0.190829	0	0
Otu348	Otu403	0.190824	2e-05	0.000324
Otu357	Otu370	0.190744	0.00942	0.041919
Otu414	Otu449	0.190732	0	0
Otu402	Otu449	0.190658	0	0
Otu313	Otu437	0.19064	0.0001	0.001285
Otu335	Otu386	0.190628	0.00052	0.004771
Otu316	Otu384	0.190527	0.0029	0.017732
Otu325	Otu450	0.190306	0.00994	0.043542
Otu314	Otu330	0.190286	0	0
Otu309	Otu330	0.190255	0	0
Otu384	Otu427	0.190221	0	0
Otu319	Otu437	0.190114	0.00558	0.028949
Otu335	Otu353	0.190107	0.00012	0.001497
Otu353	Otu389	0.189987	0.00026	0.002768
Otu385	Otu421	0.189941	0	0
Otu307	Otu426	0.189926	0.00014	0.001699
Otu404	Otu426	0.189916	6e-05	0.000849
Otu314	Otu350	0.189912	0	0
Otu427	Otu441	0.189785	0	0
Otu308	Otu430	0.189731	0	0
Otu417	Otu428	0.18973	4e-05	0.000601
Otu308	Otu338	0.189723	0	0
Otu348	Otu427	0.189707	0	0
Otu424	Otu427	0.189615	0	0
Otu321	Otu339	0.189604	0.00354	0.020627
Otu312	Otu397	0.189567	0	0
Otu348	Otu369	0.189529	0.00126	0.009514
Otu310	Otu445	0.189528	0.00324	0.019331
Otu345	Otu389	0.189395	0	0
Otu321	Otu442	0.189381	0.00802	0.037641
Otu418	Otu449	0.189366	0	0
Otu326	Otu338	0.189362	0.0001	0.001285
Otu409	Otu435	0.18926	0	0
Otu417	Otu418	0.189196	4e-05	0.000601
Otu357	Otu389	0.189105	0.00108	0.008473
Otu317	Otu338	0.189083	0.00032	0.003277
Otu407	Otu430	0.188931	2e-05	0.000324
Otu304	Otu308	0.18886	0	0
Otu418	Otu429	0.18879	2e-05	0.000324
Otu312	Otu428	0.188753	0	0
Otu345	Otu397	0.18875	0	0
Otu309	Otu423	0.188642	2e-05	0.000324
Otu321	Otu360	0.188588	0.00654	0.032537
Otu348	Otu398	0.188551	0	0
Otu405	Otu427	0.188216	0	0
Otu314	Otu388	0.188016	0	0
Otu413	Otu428	0.187741	2e-05	0.000324
Otu307	Otu388	0.187719	0	0
Otu385	Otu401	0.187637	0	0
Otu427	Otu449	0.187601	0	0
Otu343	Otu402	0.187597	0	0
Otu312	Otu330	0.187559	0	0
Otu330	Otu443	0.187498	0.00012	0.001497
Otu355	Otu410	0.187488	0.00196	0.013227
Otu402	Otu417	0.187449	2e-05	0.000324
Otu392	Otu432	0.187351	0.0011	0.00859
Otu309	Otu414	0.187118	0	0
Otu345	Otu425	0.187051	0	0
Otu413	Otu416	0.186946	0	0
Otu411	Otu449	0.186931	0.00052	0.004771
Otu439	Otu441	0.186819	6e-05	0.000849
Otu335	Otu400	0.186761	0.0003	0.003111
Otu311	Otu443	0.186683	0.00078	0.006539
Otu308	Otu356	0.186595	0	0
Otu312	Otu439	0.186561	0	0
Otu401	Otu418	0.18654	0	0
Otu385	Otu398	0.186533	0	0
Otu400	Otu401	0.186495	0	0
Otu398	Otu414	0.186489	0	0
Otu341	Otu446	0.186462	0.00762	0.036235
Otu345	Otu353	0.186434	0	0
Otu416	Otu449	0.186405	0	0
Otu308	Otu411	0.186365	0	0
Otu400	Otu402	0.186226	0	0
Otu349	Otu423	0.186184	0.0003	0.003111
Otu393	Otu426	0.186127	0	0
Otu338	Otu427	0.186116	0	0
Otu309	Otu407	0.186102	0	0
Otu389	Otu449	0.186035	0.00014	0.001699
Otu394	Otu426	0.186035	0	0
Otu332	Otu357	0.186028	0.00704	0.034316
Otu310	Otu412	0.18601	6e-05	0.000849
Otu318	Otu420	0.185793	2e-05	0.000324
Otu429	Otu443	0.185781	0.00052	0.004771
Otu382	Otu400	0.185749	0.00514	0.027288
Otu348	Otu417	0.18566	4e-05	0.000601
Otu332	Otu389	0.185606	0.0009	0.007339
Otu358	Otu389	0.185604	0	0
Otu385	Otu407	0.1856	0	0
Otu423	Otu429	0.185554	0.00034	0.003429
Otu443	Otu453	0.185522	0.00018	0.002074
Otu388	Otu412	0.185521	0	0
Otu305	Otu402	0.185497	2e-05	0.000324
Otu314	Otu424	0.185449	0	0
Otu384	Otu409	0.185377	0.00262	0.01643
Otu390	Otu420	0.185312	0.0041	0.023058
Otu393	Otu424	0.185237	0	0
Otu355	Otu427	0.185215	0	0
Otu385	Otu423	0.185187	0.00014	0.001699
Otu348	Otu402	0.185183	8e-05	0.001073
Otu330	Otu353	0.18516	0.00018	0.002074
Otu416	Otu437	0.18501	0	0
Otu372	Otu381	0.184915	0.0026	0.01634
Otu358	Otu430	0.184879	0	0
Otu413	Otu424	0.184845	4e-05	0.000601
Otu330	Otu407	0.184845	0	0
Otu338	Otu398	0.184838	0	0
Otu310	Otu318	0.184837	6e-05	0.000849
Otu308	Otu413	0.184734	0	0
Otu317	Otu329	0.184723	0.00104	0.008234
Otu345	Otu413	0.184648	0	0
Otu422	Otu427	0.184625	0	0
Otu318	Otu422	0.184614	4e-05	0.000601
Otu349	Otu420	0.184554	0.00086	0.007067
Otu343	Otu435	0.184544	0	0
Otu313	Otu373	0.184493	0.00106	0.008356
Otu308	Otu353	0.184485	0	0
Otu311	Otu432	0.184475	4e-05	0.000601
Otu404	Otu408	0.184297	0.004	0.022644
Otu426	Otu449	0.184212	0	0
Otu339	Otu341	0.184205	0.01028	0.044596
Otu338	Otu393	0.184202	0	0
Otu346	Otu446	0.184162	0.00934	0.041704
Otu357	Otu444	0.184019	0.01146	0.048162
Otu312	Otu326	0.183987	0	0
Otu345	Otu443	0.18394	0	0
Otu348	Otu422	0.183891	0.00054	0.004903
Otu313	Otu409	0.18385	0.00048	0.004478
Otu432	Otu433	0.183835	0.00044	0.004173
Otu391	Otu402	0.18373	8e-05	0.001073
Otu393	Otu405	0.183701	0	0
Otu311	Otu426	0.183669	0.00014	0.001699
Otu351	Otu362	0.183606	0.00628	0.03159
Otu397	Otu441	0.1835	4e-05	0.000601
Otu388	Otu415	0.183498	0	0
Otu330	Otu439	0.183497	4e-05	0.000601
Otu423	Otu428	0.183368	0.00014	0.001699
Otu349	Otu428	0.18331	0.00014	0.001699
Otu427	Otu428	0.183282	0	0
Otu428	Otu449	0.183241	6e-05	0.000849
Otu403	Otu421	0.183194	0	0
Otu343	Otu345	0.183192	0	0
Otu402	Otu412	0.183191	0	0
Otu317	Otu388	0.183171	2e-05	0.000324
Otu392	Otu420	0.183168	0.00372	0.02141
Otu338	Otu429	0.183148	6e-05	0.000849
Otu330	Otu401	0.183109	0	0
Otu352	Otu384	0.183107	0.00232	0.014978
Otu318	Otu402	0.183101	0	0
Otu394	Otu432	0.183023	0	0
Otu393	Otu420	0.182844	0	0
Otu311	Otu414	0.182817	2e-05	0.000324
Otu405	Otu423	0.182791	0.00072	0.006157
Otu413	Otu427	0.182714	0	0
Otu309	Otu311	0.182634	0	0
Otu311	Otu449	0.182628	8e-05	0.001073
Otu414	Otu418	0.182554	0	0
Otu424	Otu443	0.182461	0.0002	0.002256
Otu397	Otu437	0.182435	0.00028	0.002943
Otu357	Otu420	0.182194	0.0045	0.024744
Otu330	Otu397	0.182147	8e-05	0.001073
Otu413	Otu431	0.182138	0	0
Otu314	Otu338	0.182088	0	0
Otu421	Otu449	0.18193	0	0
Otu343	Otu358	0.181914	0	0
Otu338	Otu431	0.181753	0	0
Otu313	Otu421	0.181675	0	0
Otu391	Otu433	0.181608	0.00322	0.019226
Otu338	Otu416	0.181557	0	0
Otu412	Otu435	0.181545	0	0
Otu352	Otu353	0.18149	0.00124	0.009396
Otu398	Otu428	0.181415	0	0
Otu350	Otu427	0.181377	0	0
Otu343	Otu421	0.181366	0	0
Otu352	Otu449	0.181346	0.00018	0.002074
Otu326	Otu426	0.181231	6e-05	0.000849
Otu343	Otu429	0.18119	0.00012	0.001497
Otu345	Otu400	0.181114	0	0
Otu314	Otu343	0.181081	0	0
Otu330	Otu435	0.180888	0	0
Otu304	Otu318	0.180827	8e-05	0.001073
Otu338	Otu369	0.180802	0.00086	0.007067
Otu350	Otu416	0.180699	0	0
Otu320	Otu437	0.180649	0.00234	0.015066
Otu309	Otu401	0.180584	0	0
Otu326	Otu412	0.180514	6e-05	0.000849
Otu349	Otu441	0.180453	0.0002	0.002256
Otu397	Otu428	0.18044	6e-05	0.000849
Otu384	Otu398	0.180344	0	0
Otu311	Otu428	0.180329	0	0
Otu312	Otu334	0.180329	0	0
Otu305	Otu393	0.180149	0	0
Otu317	Otu402	0.180142	6e-05	0.000849
Otu313	Otu402	0.18014	2e-05	0.000324
Otu393	Otu402	0.180051	0	0
Otu356	Otu449	0.179991	6e-05	0.000849
Otu412	Otu418	0.179949	2e-05	0.000324
Otu313	Otu445	0.179854	0.00116	0.008933
Otu435	Otu439	0.17982	0	0
Otu421	Otu453	0.179792	0	0
Otu311	Otu318	0.179722	6e-05	0.000849
Otu338	Otu404	0.179697	0.00056	0.005049
Otu352	Otu407	0.179696	0	0
Otu307	Otu356	0.179666	0.00192	0.013021
Otu350	Otu385	0.179641	0.0001	0.001285
Otu363	Otu400	0.179597	0.00808	0.037866
Otu413	Otu414	0.179552	0	0
Otu418	Otu443	0.179475	0.00026	0.002768
Otu394	Otu428	0.179468	0	0
Otu350	Otu437	0.17941	0.00022	0.002431
Otu326	Otu330	0.179409	0.0001	0.001285
Otu350	Otu357	0.179391	0.00184	0.012608
Otu428	Otu432	0.179359	6e-05	0.000849
Otu426	Otu428	0.179332	0	0
Otu311	Otu413	0.179308	0.00054	0.004903
Otu312	Otu401	0.17913	0	0
Otu388	Otu407	0.179114	0	0
Otu360	Otu429	0.179094	0.002	0.013442
Otu388	Otu428	0.179094	0	0
Otu331	Otu360	0.179075	0.01078	0.046074
Otu402	Otu431	0.179063	0	0
Otu394	Otu430	0.179042	0	0
Otu416	Otu422	0.179022	0	0
Otu357	Otu407	0.178919	0	0
Otu316	Otu358	0.178867	6e-05	0.000849
Otu391	Otu403	0.178856	0.00082	0.006806
Otu427	Otu433	0.178747	0	0
Otu401	Otu423	0.178653	8e-05	0.001073
Otu406	Otu453	0.178438	0.00012	0.001497
Otu414	Otu453	0.178438	0	0
Otu345	Otu431	0.178341	0	0
Otu308	Otu330	0.178151	0	0
Otu326	Otu345	0.178141	2e-05	0.000324
Otu443	Otu450	0.178135	0.00186	0.01272
Otu431	Otu443	0.178108	2e-05	0.000324
Otu350	Otu420	0.178073	0.00064	0.005622
Otu314	Otu429	0.178036	0	0
Otu330	Otu441	0.178027	6e-05	0.000849
Otu393	Otu417	0.178007	0	0
Otu446	Otu448	0.177956	0.0106	0.045548
Otu362	Otu413	0.177917	0.00024	0.002599
Otu335	Otu421	0.177909	0	0
Otu423	Otu424	0.177907	0.00018	0.002074
Otu307	Otu334	0.177879	0.00342	0.020108
Otu414	Otu431	0.177866	0	0
Otu427	Otu453	0.177845	0	0
Otu402	Otu443	0.177768	0.0001	0.001285
Otu400	Otu430	0.177748	0.00182	0.012492
Otu343	Otu441	0.177741	0	0
Otu405	Otu422	0.177735	0.0006	0.005345
Otu397	Otu424	0.177701	6e-05	0.000849
Otu389	Otu413	0.177683	0.00022	0.002431
Otu415	Otu441	0.177644	0.00014	0.001699
Otu341	Otu389	0.177563	0.00348	0.020353
Otu388	Otu401	0.177513	0	0
Otu314	Otu394	0.17744	0	0
Otu330	Otu438	0.177432	0.00364	0.021067
Otu385	Otu449	0.17742	4e-05	0.000601
Otu307	Otu402	0.177394	6e-05	0.000849
Otu363	Otu425	0.177317	0.00788	0.037175
Otu414	Otu417	0.177261	0	0
Otu307	Otu414	0.177231	0.00012	0.001497
Otu314	Otu397	0.177159	0	0
Otu350	Otu424	0.177102	2e-05	0.000324
Otu309	Otu443	0.17705	4e-05	0.000601
Otu309	Otu413	0.177011	4e-05	0.000601
Otu338	Otu355	0.17696	0.0006	0.005345
Otu326	Otu388	0.176953	0	0
Otu385	Otu437	0.17694	0.00018	0.002074
Otu318	Otu335	0.17694	0	0
Otu355	Otu431	0.176892	0	0
Otu402	Otu413	0.176758	2e-05	0.000324
Otu350	Otu414	0.176749	0	0
Otu309	Otu355	0.17667	4e-05	0.000601
Otu405	Otu407	0.176634	0	0
Otu384	Otu416	0.176507	0	0
Otu405	Otu416	0.176507	0	0
Otu311	Otu412	0.176506	2e-05	0.000324
Otu312	Otu422	0.17648	0	0
Otu330	Otu437	0.176394	0.00034	0.003429
Otu345	Otu352	0.176377	0	0
Otu326	Otu401	0.176368	2e-05	0.000324
Otu420	Otu435	0.176358	0	0
Otu318	Otu326	0.176325	0	0
Otu394	Otu439	0.176325	0	0
Otu423	Otu437	0.17629	0.00062	0.005493
Otu310	Otu430	0.17628	0.00146	0.010611
Otu352	Otu406	0.176131	0.0009	0.007339
Otu348	Otu388	0.176112	0	0
Otu338	Otu422	0.17607	0.00034	0.003429
Otu358	Otu384	0.176024	2e-05	0.000324
Otu343	Otu453	0.176011	2e-05	0.000324
Otu310	Otu437	0.175968	0.00132	0.009842
Otu401	Otu427	0.175932	0	0
Otu402	Otu437	0.17588	0	0
Otu307	Otu312	0.175676	0	0
Otu326	Otu414	0.175621	4e-05	0.000601
Otu423	Otu432	0.175606	0.00052	0.004771
Otu332	Otu360	0.17556	0.01096	0.046639
Otu358	Otu414	0.175541	0	0
Otu394	Otu433	0.175498	2e-05	0.000324
Otu420	Otu431	0.175479	4e-05	0.000601
Otu317	Otu318	0.175474	8e-05	0.001073
Otu414	Otu428	0.175459	0	0
Otu379	Otu428	0.17544	0.00066	0.005758
Otu385	Otu418	0.175412	0.0001	0.001285
Otu308	Otu350	0.17537	0	0
Otu412	Otu420	0.175246	0.00012	0.001497
Otu313	Otu416	0.175228	0	0
Otu350	Otu412	0.175222	2e-05	0.000324
Otu311	Otu388	0.175191	0	0
Otu309	Otu343	0.17517	0	0
Otu314	Otu353	0.175128	0	0
Otu311	Otu357	0.175079	0.00092	0.007461
Otu305	Otu422	0.175002	0.00094	0.007591
Otu308	Otu389	0.174977	0	0
Otu413	Otu429	0.174932	0.00018	0.002074
Otu318	Otu439	0.174914	0	0
Otu335	Otu398	0.174908	0	0
Otu311	Otu399	0.174855	0.00092	0.007461
Otu304	Otu329	0.174836	0.00114	0.008819
Otu348	Otu416	0.174792	0	0
Otu345	Otu348	0.174743	0	0
Otu430	Otu431	0.174742	0	0
Otu409	Otu441	0.174737	0.00024	0.002599
Otu406	Otu432	0.174705	0.00022	0.002431
Otu418	Otu426	0.174595	4e-05	0.000601
Otu314	Otu423	0.174589	0	0
Otu308	Otu453	0.174574	0	0
Otu405	Otu406	0.174454	0.00074	0.006274
Otu309	Otu428	0.174384	0	0
Otu314	Otu418	0.174364	0	0
Otu424	Otu430	0.174312	0.00022	0.002431
Otu329	Otu408	0.1743	0.00332	0.01968
Otu409	Otu442	0.174279	0.00856	0.039347
Otu384	Otu435	0.174093	0	0
Otu397	Otu398	0.174079	0	0
Otu420	Otu442	0.174017	0.0065	0.032398
Otu309	Otu449	0.173981	2e-05	0.000324
Otu305	Otu435	0.173958	0	0
Otu309	Otu357	0.173932	4e-05	0.000601
Otu343	Otu401	0.173927	0	0
Otu388	Otu394	0.173922	0	0
Otu318	Otu417	0.173905	4e-05	0.000601
Otu355	Otu398	0.173893	0	0
Otu353	Otu388	0.173879	0	0
Otu398	Otu441	0.173693	0	0
Otu356	Otu433	0.17368	0.0017	0.011864
Otu313	Otu398	0.173625	0	0
Otu417	Otu441	0.173586	0	0
Otu317	Otu450	0.173514	0.0084	0.038798
Otu356	Otu428	0.173425	0.00038	0.003735
Otu407	Otu450	0.173393	0	0
Otu417	Otu432	0.173336	0.0002	0.002256
Otu358	Otu439	0.173228	2e-05	0.000324
Otu352	Otu362	0.173024	0.00276	0.017086
Otu393	Otu414	0.173018	0	0
Otu401	Otu437	0.17301	2e-05	0.000324
Otu309	Otu329	0.172943	0	0
Otu401	Otu412	0.172911	0	0
Otu330	Otu343	0.172877	6e-05	0.000849
Otu385	Otu413	0.172843	0.0003	0.003111
Otu394	Otu423	0.172639	0	0
Otu367	Otu389	0.172592	0.00476	0.025771
Otu305	Otu406	0.172457	0.00058	0.005205
Otu439	Otu453	0.172422	0.00012	0.001497
Otu343	Otu385	0.17239	0.0001	0.001285
Otu304	Otu362	0.172385	0.0024	0.015372
Otu343	Otu417	0.172301	0.00012	0.001497
Otu311	Otu402	0.172045	6e-05	0.000849
Otu309	Otu406	0.172044	2e-05	0.000324
Otu388	Otu405	0.171925	0	0
Otu422	Otu449	0.171909	0.00026	0.002768
Otu411	Otu439	0.171817	0.00218	0.014319
Otu338	Otu425	0.171804	0.00104	0.008234
Otu318	Otu428	0.171796	0	0
Otu313	Otu431	0.171767	0	0
Otu353	Otu430	0.171713	0.00196	0.013227
Otu317	Otu400	0.171684	0.00402	0.022723
Otu335	Otu416	0.17155	0	0
Otu403	Otu427	0.171525	0	0
Otu389	Otu428	0.17146	0.0003	0.003111
Otu343	Otu418	0.171436	0.0001	0.001285
Otu308	Otu422	0.171288	0	0
Otu402	Otu424	0.171242	0	0
Otu312	Otu420	0.171198	0	0
Otu353	Otu426	0.171174	0.00018	0.002074
Otu416	Otu425	0.171019	0	0
Otu421	Otu425	0.170979	0	0
Otu310	Otu343	0.170883	0.0004	0.003882
Otu312	Otu369	0.170823	0	0
Otu394	Otu413	0.170634	4e-05	0.000601
Otu308	Otu343	0.170511	0	0
Otu369	Otu417	0.170471	0.00076	0.006406
Otu305	Otu325	0.170449	0.00524	0.027682
Otu311	Otu435	0.170381	0	0
Otu308	Otu437	0.170187	0	0
Otu326	Otu416	0.170158	0	0
Otu389	Otu437	0.170153	0.00082	0.006806
Otu314	Otu348	0.170124	0	0
Otu423	Otu435	0.1701	0	0
Otu420	Otu449	0.170093	0.00048	0.004478
Otu304	Otu313	0.170041	0.0008	0.006671
Otu400	Otu427	0.170022	0	0
Otu388	Otu437	0.169928	2e-05	0.000324
Otu386	Otu414	0.169845	0.0002	0.002256
Otu345	Otu441	0.169842	0	0
Otu318	Otu350	0.169789	0	0
Otu308	Otu441	0.169753	0	0
Otu323	Otu449	0.169724	0.00164	0.011569
Otu384	Otu417	0.169695	0.00064	0.005622
Otu312	Otu417	0.169681	0	0
Otu312	Otu321	0.169644	2e-05	0.000324
Otu343	Otu413	0.16964	0.00014	0.001699
Otu385	Otu425	0.169624	0.00106	0.008356
Otu391	Otu453	0.169547	0.00128	0.009618
Otu404	Otu411	0.169497	0.01136	0.047873
Otu400	Otu449	0.169469	0.00054	0.004903
Otu329	Otu400	0.169463	0.00228	0.014794
Otu404	Otu407	0.169269	6e-05	0.000849
Otu326	Otu435	0.169265	0	0
Otu317	Otu325	0.169243	0.00878	0.040063
Otu412	Otu416	0.169237	0	0
Otu413	Otu435	0.16922	0	0
Otu412	Otu431	0.169219	0	0
Otu397	Otu405	0.169153	0.00048	0.004478
Otu305	Otu453	0.169077	0.00054	0.004903
Otu321	Otu331	0.169052	0.01024	0.04446
Otu398	Otu423	0.168817	0	0
Otu402	Otu414	0.168802	2e-05	0.000324
Otu384	Otu418	0.168754	0.00026	0.002768
Otu356	Otu385	0.168624	0.00074	0.006274
Otu330	Otu422	0.168537	0.00044	0.004173
Otu345	Otu379	0.168382	4e-05	0.000601
Otu420	Otu429	0.168324	0.00236	0.015167
Otu326	Otu394	0.168289	4e-05	0.000601
Otu314	Otu449	0.168146	0	0
Otu309	Otu432	0.168021	0	0
Otu308	Otu417	0.167977	0	0
Otu384	Otu392	0.167858	0.00976	0.042929
Otu331	Otu332	0.16783	0.01196	0.049644
Otu430	Otu435	0.167819	0	0
Otu335	Otu435	0.167775	0	0
Otu407	Otu420	0.167734	0	0
Otu304	Otu384	0.167665	0.00268	0.016699
Otu406	Otu424	0.167635	0.0004	0.003882
Otu307	Otu308	0.167606	0	0
Otu349	Otu369	0.167577	0.00304	0.018389
Otu309	Otu429	0.167552	8e-05	0.001073
Otu310	Otu418	0.167533	0.00026	0.002768
Otu311	Otu424	0.167525	0.0002	0.002256
Otu358	Otu418	0.167519	2e-05	0.000324
Otu369	Otu388	0.167412	0	0
Otu415	Otu450	0.167369	0.00348	0.020353
Otu308	Otu420	0.167294	0	0
Otu314	Otu417	0.167247	2e-05	0.000324
Otu391	Otu439	0.167141	0.00176	0.012185
Otu438	Otu449	0.167136	0.0046	0.025143
Otu318	Otu389	0.167083	0	0
Otu353	Otu402	0.167078	8e-05	0.001073
Otu338	Otu412	0.167029	0.0001	0.001285
Otu394	Otu402	0.16699	0	0
Otu356	Otu413	0.166974	0.00046	0.004322
Otu388	Otu453	0.166946	2e-05	0.000324
Otu343	Otu414	0.166903	2e-05	0.000324
Otu345	Otu385	0.166865	0	0
Otu334	Otu427	0.166842	0	0
Otu411	Otu426	0.166831	0.0005	0.004625
Otu400	Otu425	0.166757	0.00372	0.02141
Otu421	Otu429	0.166689	0	0
Otu304	Otu340	0.166678	0.0062	0.03131
Otu384	Otu388	0.166474	2e-05	0.000324
Otu409	Otu449	0.166406	0.00074	0.006274
Otu392	Otu409	0.166319	0.00866	0.039688
Otu343	Otu397	0.166279	0.00016	0.001891
Otu335	Otu349	0.166262	0.00062	0.005493
Otu335	Otu414	0.166051	4e-05	0.000601
Otu312	Otu430	0.166023	2e-05	0.000324
Otu397	Otu432	0.16598	0.00024	0.002599
Otu356	Otu358	0.165957	6e-05	0.000849
Otu318	Otu400	0.165946	0.00012	0.001497
Otu392	Otu393	0.165945	0.00016	0.001891
Otu412	Otu426	0.165898	2e-05	0.000324
Otu348	Otu413	0.165867	0.0008	0.006671
Otu314	Otu453	0.165763	0	0
Otu326	Otu417	0.165739	0.00038	0.003735
Otu369	Otu404	0.165657	0.00812	0.037988
Otu355	Otu414	0.165588	8e-05	0.001073
Otu332	Otu415	0.165575	0.00248	0.015751
Otu358	Otu425	0.16548	0.00018	0.002074
Otu424	Otu426	0.16537	0.00014	0.001699
Otu318	Otu413	0.165285	2e-05	0.000324
Otu381	Otu405	0.165257	0.0036	0.020895
Otu398	Otu430	0.165128	0	0
Otu389	Otu412	0.165102	2e-05	0.000324
Otu398	Otu409	0.165009	0	0
Otu312	Otu389	0.165005	0	0
Otu380	Otu406	0.164944	0.00282	0.017361
Otu326	Otu423	0.164941	0.0008	0.006671
Otu314	Otu358	0.164893	0	0
Otu422	Otu428	0.164819	0.00048	0.004478
Otu313	Otu318	0.164812	4e-05	0.000601
Otu349	Otu388	0.164663	0	0
Otu309	Otu422	0.164562	0.00014	0.001699
Otu334	Otu395	0.164476	0.01148	0.04821
Otu404	Otu446	0.164476	0.00704	0.034316
Otu414	Otu443	0.164474	8e-05	0.001073
Otu430	Otu439	0.164421	0.00108	0.008473
Otu308	Otu405	0.164393	0	0
Otu403	Otu406	0.164354	0.0004	0.003882
Otu307	Otu309	0.164283	0.0002	0.002256
Otu326	Otu429	0.164021	0.00102	0.008106
Otu388	Otu441	0.163999	0	0
Otu401	Otu429	0.163944	0.00018	0.002074
Otu326	Otu427	0.163871	0	0
Otu391	Otu409	0.163739	0.00884	0.040229
Otu318	Otu348	0.163657	0.00016	0.001891
Otu403	Otu413	0.163644	0.00034	0.003429
Otu427	Otu432	0.163608	0	0
Otu313	Otu320	0.163548	0.00254	0.016036
Otu326	Otu357	0.163519	0.00432	0.023992
Otu317	Otu386	0.163515	0.00908	0.040911
Otu358	Otu405	0.16349	6e-05	0.000849
Otu413	Otu433	0.163489	0.0011	0.00859
Otu358	Otu420	0.163489	0.0001	0.001285
Otu429	Otu435	0.163465	0	0
Otu381	Otu402	0.163434	0.00016	0.001891
Otu312	Otu409	0.163338	0	0
Otu415	Otu416	0.163241	0	0
Otu314	Otu406	0.16323	2e-05	0.000324
Otu335	Otu388	0.163209	2e-05	0.000324
Otu311	Otu350	0.163188	0.00034	0.003429
Otu385	Otu414	0.163177	6e-05	0.000849
Otu318	Otu356	0.163166	0.00012	0.001497
Otu326	Otu350	0.163164	0.00054	0.004903
Otu335	Otu443	0.163071	0.00108	0.008473
Otu308	Otu450	0.16297	0	0
Otu307	Otu421	0.162966	0	0
Otu431	Otu453	0.162959	0	0
Otu338	Otu418	0.162946	6e-05	0.000849
Otu398	Otu422	0.162925	0	0
Otu386	Otu446	0.162904	0.01146	0.048162
Otu416	Otu430	0.162846	0	0
Otu428	Otu441	0.162702	0.00018	0.002074
Otu350	Otu431	0.162673	0	0
Otu340	Otu403	0.162557	0.00288	0.017642
Otu322	Otu421	0.162497	2e-05	0.000324
Otu369	Otu379	0.162482	0.0098	0.043058
Otu406	Otu443	0.162309	0.0017	0.011864
Otu398	Otu412	0.162147	0	0
Otu429	Otu441	0.162117	0.00036	0.003581
Otu414	Otu422	0.162012	0.0001	0.001285
Otu355	Otu393	0.161926	6e-05	0.000849
Otu312	Otu441	0.161906	0	0
Otu419	Otu449	0.161844	0.00218	0.014319
Otu389	Otu429	0.161812	0.00082	0.006806
Otu389	Otu438	0.161776	0.0111	0.047075
Otu407	Otu443	0.161773	4e-05	0.000601
Otu350	Otu398	0.161737	0	0
Otu338	Otu394	0.161736	0	0
Otu338	Otu414	0.161658	2e-05	0.000324
Otu428	Otu437	0.161535	0.0008	0.006671
Otu369	Otu394	0.161471	0.0001	0.001285
Otu305	Otu397	0.161232	0.00112	0.008716
Otu369	Otu427	0.161193	0	0
Otu353	Otu435	0.161158	0	0
Otu338	Otu423	0.16113	0.00076	0.006406
Otu394	Otu422	0.161012	8e-05	0.001073
Otu330	Otu349	0.161011	0.0006	0.005345
Otu393	Otu404	0.160942	0.00024	0.002599
Otu340	Otu355	0.16092	0.00888	0.04035
Otu415	Otu429	0.160919	0.00156	0.011171
Otu404	Otu417	0.160912	0.00184	0.012608
Otu350	Otu407	0.160864	2e-05	0.000324
Otu345	Otu453	0.160845	0	0
Otu308	Otu391	0.160745	0	0
Otu330	Otu412	0.160633	0.00014	0.001699
Otu330	Otu429	0.16059	0.00074	0.006274
Otu356	Otu407	0.160529	0	0
Otu400	Otu416	0.160409	0	0
Otu311	Otu394	0.160402	4e-05	0.000601
Otu412	Otu428	0.160379	2e-05	0.000324
Otu326	Otu430	0.160291	0.00136	0.01006
Otu428	Otu450	0.160163	0.00354	0.020627
Otu324	Otu423	0.160135	0.00754	0.035973
Otu426	Otu432	0.160045	0.00016	0.001891
Otu355	Otu369	0.159998	0.00592	0.03025
Otu343	Otu394	0.159897	2e-05	0.000324
Otu318	Otu404	0.159849	0.00026	0.002768
Otu420	Otu424	0.159773	0.00134	0.009958
Otu407	Otu422	0.159771	2e-05	0.000324
Otu311	Otu322	0.159725	0.00136	0.01006
Otu394	Otu429	0.159718	6e-05	0.000849
Otu406	Otu441	0.159684	0.0003	0.003111
Otu305	Otu318	0.159672	8e-05	0.001073
Otu404	Otu431	0.159559	2e-05	0.000324
Otu355	Otu429	0.159446	0.00212	0.014034
Otu334	Otu420	0.159344	0.0061	0.030915
Otu307	Otu394	0.159324	0.00016	0.001891
Otu389	Otu398	0.159283	0	0
Otu348	Otu394	0.159224	0.00014	0.001699
Otu388	Otu417	0.159193	2e-05	0.000324
Otu356	Otu404	0.159133	0.00458	0.025065
Otu406	Otu433	0.159114	0.00248	0.015751
Otu402	Otu435	0.159108	0	0
Otu334	Otu413	0.15891	0.00164	0.011569
Otu338	Otu407	0.158787	4e-05	0.000601
Otu400	Otu413	0.158777	0.00068	0.005889
Otu307	Otu385	0.158768	0.00248	0.015751
Otu307	Otu425	0.158723	0.00888	0.04035
Otu350	Otu389	0.158674	0.00106	0.008356
Otu417	Otu453	0.158567	0.00028	0.002943
Otu405	Otu428	0.158516	0.00126	0.009514
Otu424	Otu433	0.158453	0.00128	0.009618
Otu403	Otu408	0.158439	0.0027	0.016786
Otu326	Otu418	0.158349	0.00026	0.002768
Otu323	Otu437	0.158347	0.00908	0.040911
Otu312	Otu415	0.158327	2e-05	0.000324
Otu309	Otu389	0.158313	4e-05	0.000601
Otu429	Otu450	0.158292	0.00568	0.02937
Otu413	Otu434	0.158222	0.00176	0.012185
Otu428	Otu443	0.158209	0.00126	0.009514
Otu385	Otu393	0.158205	0	0
Otu318	Otu441	0.158188	0	0
Otu324	Otu418	0.158078	0.0011	0.00859
Otu397	Otu414	0.158061	0.0001	0.001285
Otu348	Otu424	0.157975	0.0007	0.006026
Otu441	Otu450	0.15797	0.00204	0.013638
Otu343	Otu431	0.157881	0	0
Otu334	Otu338	0.157879	0.00194	0.013126
Otu307	Otu406	0.157715	0.00394	0.022371
Otu314	Otu411	0.157627	2e-05	0.000324
Otu355	Otu402	0.157556	0.00024	0.002599
Otu317	Otu425	0.157553	0.00712	0.034578
Otu391	Otu415	0.157416	0.0047	0.025539
Otu311	Otu330	0.157397	0.00024	0.002599
Otu353	Otu398	0.157393	0	0
Otu355	Otu422	0.157362	0.00308	0.018572
Otu393	Otu413	0.157349	2e-05	0.000324
Otu372	Otu423	0.157336	0.00656	0.032602
Otu355	Otu417	0.157331	0.0012	0.009159
Otu334	Otu388	0.157303	4e-05	0.000601
Otu326	Otu409	0.157247	0.00334	0.019759
Otu305	Otu307	0.157203	0.00648	0.032324
Otu416	Otu432	0.157175	0	0
Otu397	Otu433	0.157172	0.00152	0.010959
Otu345	Otu420	0.157147	6e-05	0.000849
Otu356	Otu398	0.157141	0	0
Otu397	Otu417	0.157028	0.00054	0.004903
Otu421	Otu443	0.157014	4e-05	0.000601
Otu357	Otu418	0.156934	0.00138	0.010174
Otu312	Otu350	0.156885	0	0
Otu355	Otu401	0.15685	0.00048	0.004478
Otu309	Otu417	0.156845	4e-05	0.000601
Otu393	Otu418	0.156839	0	0
Otu353	Otu394	0.156773	6e-05	0.000849
Otu330	Otu391	0.156738	0.00336	0.019848
Otu317	Otu404	0.156684	0.00926	0.041481
Otu305	Otu441	0.156661	0.00066	0.005758
Otu353	Otu401	0.156521	0.00046	0.004322
Otu309	Otu415	0.156512	0.00014	0.001699
Otu352	Otu435	0.156469	0	0
Otu349	Otu453	0.15646	0.0011	0.00859
Otu400	Otu412	0.156443	0.00064	0.005622
Otu330	Otu420	0.156269	0.00166	0.011668
Otu307	Otu353	0.156262	0.00742	0.035571
Otu402	Otu433	0.156216	0.00026	0.002768
Otu394	Otu417	0.156152	4e-05	0.000601
Otu330	Otu358	0.156111	0.0001	0.001285
Otu384	Otu422	0.156005	0.00398	0.022551
Otu358	Otu453	0.15591	4e-05	0.000601
Otu313	Otu427	0.155886	0	0
Otu358	Otu424	0.155878	4e-05	0.000601
Otu403	Otu443	0.155833	0.00128	0.009618
Otu388	Otu432	0.155792	2e-05	0.000324
Otu308	Otu400	0.155733	0	0
Otu385	Otu397	0.155692	0.00056	0.005049
Otu330	Otu428	0.155678	0.0003	0.003111
Otu308	Otu403	0.155656	0	0
Otu323	Otu385	0.155631	0.00326	0.019411
Otu308	Otu406	0.15557	0	0
Otu398	Otu439	0.155542	2e-05	0.000324
Otu352	Otu412	0.155512	0.00068	0.005889
Otu388	Otu450	0.155495	8e-05	0.001073
Otu304	Otu432	0.155429	0.00254	0.016036
Otu305	Otu354	0.1554	0.01048	0.045163
Otu348	Otu435	0.155391	0	0
Otu352	Otu385	0.155348	0.00204	0.013638
Otu338	Otu353	0.155302	0.0019	0.012916
Otu317	Otu397	0.155247	0.0021	0.013946
Otu385	Otu441	0.155226	0.0004	0.003882
Otu326	Otu439	0.155167	0.00106	0.008356
Otu313	Otu314	0.155165	4e-05	0.000601
Otu313	Otu356	0.155153	0.00136	0.01006
Otu329	Otu401	0.155137	0.00044	0.004173
Otu311	Otu403	0.155043	0.00044	0.004173
Otu309	Otu420	0.155041	0.0004	0.003882
Otu413	Otu420	0.154834	0.0028	0.017264
Otu307	Otu343	0.154823	0.00222	0.014501
Otu401	Otu432	0.154669	0.00024	0.002599
Otu348	Otu391	0.154654	0.00672	0.03315
Otu349	Otu450	0.154644	0.00792	0.037286
Otu308	Otu415	0.154517	0	0
Otu313	Otu335	0.154481	0.00074	0.006274
Otu311	Otu439	0.154431	0.0007	0.006026
Otu307	Otu453	0.154396	0.00246	0.01565
Otu314	Otu441	0.154331	2e-05	0.000324
Otu421	Otu432	0.154267	0	0
Otu334	Otu343	0.154226	0.00184	0.012608
Otu317	Otu437	0.15418	0.00496	0.026569
Otu335	Otu425	0.154179	0.0028	0.017264
Otu388	Otu422	0.154147	2e-05	0.000324
Otu329	Otu426	0.154138	0.00024	0.002599
Otu340	Otu417	0.154097	0.00346	0.020276
Otu405	Otu426	0.154057	0.00054	0.004903
Otu330	Otu338	0.154052	0.00084	0.00694
Otu412	Otu424	0.154045	0.00018	0.002074
Otu397	Otu401	0.154036	0.00034	0.003429
Otu345	Otu433	0.15398	6e-05	0.000849
Otu431	Otu450	0.15381	8e-05	0.001073
Otu405	Otu421	0.153781	2e-05	0.000324
Otu393	Otu409	0.153773	0.00026	0.002768
Otu397	Otu413	0.153737	0.00066	0.005758
Otu406	Otu413	0.153706	0.00126	0.009514
Otu384	Otu393	0.153681	0.00016	0.001891
Otu329	Otu353	0.153653	0.00372	0.02141
Otu330	Otu357	0.153645	0.0057	0.029447
Otu349	Otu416	0.153642	0	0
Otu424	Otu437	0.153607	0.0011	0.00859
Otu400	Otu421	0.153601	2e-05	0.000324
Otu422	Otu441	0.153599	0.0006	0.005345
Otu318	Otu357	0.153588	0.00072	0.006157
Otu318	Otu354	0.153568	0.00074	0.006274
Otu314	Otu422	0.153531	6e-05	0.000849
Otu311	Otu425	0.153487	0.002	0.013442
Otu427	Otu450	0.153446	4e-05	0.000601
Otu348	Otu379	0.153287	0.00628	0.03159
Otu356	Otu414	0.15321	0.00024	0.002599
Otu332	Otu407	0.153207	0.00022	0.002431
Otu429	Otu449	0.153137	0.00072	0.006157
Otu405	Otu435	0.153131	2e-05	0.000324
Otu372	Otu406	0.153002	0.00502	0.02681
Otu311	Otu391	0.152976	0.00166	0.011668
Otu409	Otu431	0.152884	8e-05	0.001073
Otu304	Otu441	0.152841	0.00132	0.009842
Otu313	Otu324	0.152832	0.00574	0.029605
Otu321	Otu400	0.152828	0.01096	0.046639
Otu308	Otu335	0.152791	0	0
Otu407	Otu412	0.152752	2e-05	0.000324
Otu335	Otu405	0.152693	0.00224	0.01459
Otu402	Otu406	0.152658	8e-05	0.001073
Otu332	Otu449	0.152645	0.0031	0.018657
Otu421	Otu441	0.152643	4e-05	0.000601
Otu318	Otu352	0.152615	0.00038	0.003735
Otu326	Otu432	0.152574	0.00158	0.011267
Otu312	Otu423	0.152546	0	0
Otu414	Otu420	0.15252	0.0006	0.005345
Otu384	Otu402	0.152518	0.0002	0.002256
Otu406	Otu418	0.152456	0.00046	0.004322
Otu305	Otu391	0.152375	0.0091	0.040975
Otu304	Otu406	0.15237	0.00272	0.016881
Otu310	Otu416	0.152369	2e-05	0.000324
Otu431	Otu441	0.152361	0	0
Otu305	Otu416	0.152245	0	0
Otu407	Otu425	0.152218	0.00016	0.001891
Otu308	Otu443	0.152193	0	0
Otu350	Otu406	0.152126	0.00136	0.01006
Otu329	Otu404	0.15212	0.00642	0.032084
Otu389	Otu394	0.152115	2e-05	0.000324
Otu323	Otu429	0.152101	0.0075	0.035842
Otu332	Otu437	0.152071	0.00746	0.035705
Otu391	Otu441	0.152014	0.00206	0.013743
Otu343	Otu369	0.152013	0.00266	0.016623
Otu397	Otu439	0.151987	0.0006	0.005345
Otu394	Otu409	0.151943	0.00012	0.001497
Otu312	Otu385	0.151931	2e-05	0.000324
Otu318	Otu355	0.151892	0.00024	0.002599
Otu379	Otu439	0.15188	0.00358	0.020813
Otu437	Otu441	0.151878	0.00074	0.006274
Otu384	Otu421	0.151834	2e-05	0.000324
Otu355	Otu428	0.151764	0.0014	0.010284
Otu352	Otu434	0.151685	0.01118	0.047298
Otu338	Otu449	0.151646	0.00058	0.005205
Otu353	Otu355	0.151398	0.00548	0.028584
Otu356	Otu394	0.151375	6e-05	0.000849
Otu427	Otu430	0.151357	4e-05	0.000601
Otu426	Otu430	0.151282	0.00056	0.005049
Otu348	Otu393	0.151262	0.00014	0.001699
Otu422	Otu430	0.151207	0.0036	0.020895
Otu397	Otu429	0.151205	0.00144	0.010497
Otu381	Otu439	0.151191	0.0029	0.017732
Otu313	Otu407	0.151185	6e-05	0.000849
Otu345	Otu355	0.151164	8e-05	0.001073
Otu441	Otu447	0.151107	0.00236	0.015167
Otu358	Otu432	0.151107	0.00014	0.001699
Otu305	Otu398	0.151095	0	0
Otu401	Otu414	0.151055	2e-05	0.000324
Otu309	Otu350	0.150959	6e-05	0.000849
Otu406	Otu416	0.150945	0	0
Otu358	Otu402	0.150898	2e-05	0.000324
Otu348	Otu349	0.150858	0.00372	0.02141
Otu326	Otu443	0.150842	0.00254	0.016036
Otu350	Otu394	0.150826	6e-05	0.000849
Otu343	Otu425	0.150796	0.00224	0.01459
Otu363	Otu443	0.15078	0.0111	0.047075
Otu307	Otu437	0.150725	0.00734	0.035322
Otu388	Otu414	0.15062	0	0
Otu348	Otu358	0.150605	0.0002	0.002256
Otu405	Otu449	0.150603	0.00156	0.011171
Otu343	Otu355	0.150424	0.00168	0.011772
Otu330	Otu410	0.150398	0.00404	0.022811
Otu343	Otu424	0.150359	0.00044	0.004173
Otu355	Otu441	0.150153	0.0012	0.009159
Otu400	Otu428	0.150105	0.00292	0.017829
Otu407	Otu453	0.150006	4e-05	0.000601
Otu307	Otu443	0.149966	0.00848	0.039065
Otu389	Otu423	0.149926	0.00238	0.015273
Otu304	Otu316	0.149918	0.01072	0.045886
Otu384	Otu405	0.149842	0.00786	0.037102
Otu311	Otu312	0.149776	2e-05	0.000324
Otu427	Otu439	0.149688	2e-05	0.000324
Otu349	Otu385	0.149628	0.0019	0.012916
Otu353	Otu412	0.14957	0.00084	0.00694
Otu343	Otu426	0.149554	0.00034	0.003429
Otu389	Otu416	0.149542	0	0
Otu322	Otu416	0.149512	2e-05	0.000324
Otu308	Otu432	0.149509	0	0
Otu384	Otu433	0.149465	0.00856	0.039347
Otu399	Otu453	0.149328	0.00424	0.023673
Otu369	Otu398	0.149301	2e-05	0.000324
Otu330	Otu385	0.149289	0.00062	0.005493
Otu402	Otu415	0.149277	0.0004	0.003882
Otu326	Otu424	0.149217	0.00108	0.008473
Otu305	Otu330	0.149084	0.00218	0.014319
Otu345	Otu424	0.149084	2e-05	0.000324
Otu356	Otu423	0.149059	0.0033	0.01959
Otu405	Otu429	0.14898	0.00334	0.019759
Otu400	Otu432	0.148914	0.00382	0.021832
Otu330	Otu409	0.148884	0.00326	0.019411
Otu340	Otu413	0.148882	0.00376	0.021587
Otu330	Otu415	0.148833	0.00128	0.009618
Otu330	Otu404	0.148826	0.00356	0.02072
Otu312	Otu355	0.148738	2e-05	0.000324
Otu397	Otu412	0.148615	0.0006	0.005345
Otu411	Otu453	0.148547	0.00504	0.026901
Otu330	Otu384	0.148503	0.00326	0.019411
Otu362	Otu400	0.148493	0.00938	0.04181
Otu304	Otu397	0.148432	0.00196	0.013227
Otu405	Otu424	0.148388	0.00192	0.013021
Otu384	Otu449	0.148343	0.00212	0.014034
Otu304	Otu402	0.148315	0.00018	0.002074
Otu314	Otu389	0.148306	6e-05	0.000849
Otu394	Otu441	0.148101	2e-05	0.000324
Otu417	Otu437	0.148066	0.00178	0.012283
Otu437	Otu443	0.147997	0.00392	0.022282
Otu313	Otu384	0.147995	0.00394	0.022371
Otu314	Otu428	0.14792	2e-05	0.000324
Otu311	Otu429	0.147835	0.00162	0.011471
Otu311	Otu431	0.147781	4e-05	0.000601
Otu355	Otu426	0.147758	0.00076	0.006406
Otu414	Otu437	0.147747	0.0003	0.003111
Otu416	Otu450	0.147725	2e-05	0.000324
Otu340	Otu415	0.147647	0.00902	0.040737
Otu348	Otu428	0.147595	0.00206	0.013743
Otu384	Otu415	0.147575	0.00442	0.024418
Otu414	Otu441	0.147574	0.00012	0.001497
Otu391	Otu424	0.147571	0.00286	0.017538
Otu314	Otu439	0.147514	4e-05	0.000601
Otu385	Otu420	0.147513	0.00386	0.021998
Otu348	Otu412	0.147489	0.00082	0.006806
Otu330	Otu427	0.147487	0	0
Otu388	Otu443	0.147472	0.00016	0.001891
Otu311	Otu314	0.147457	0.00034	0.003429
Otu385	Otu424	0.147418	0.00074	0.006274
Otu358	Otu441	0.147365	0	0
Otu345	Otu450	0.147321	0.00038	0.003735
Otu349	Otu407	0.147273	0.00016	0.001891
Otu381	Otu435	0.147246	0	0
Otu326	Otu348	0.147237	0.00296	0.018007
Otu335	Otu401	0.147223	0.0004	0.003882
Otu304	Otu412	0.147222	0.00096	0.007717
Otu305	Otu427	0.147174	0	0
Otu350	Otu423	0.147151	0.00204	0.013638
Otu311	Otu453	0.14711	0.00058	0.005205
Otu409	Otu420	0.147079	0.01156	0.048453
Otu394	Otu443	0.147052	0.00034	0.003429
Otu311	Otu385	0.147023	0.00176	0.012185
Otu312	Otu429	0.147008	4e-05	0.000601
Otu398	Otu406	0.146911	6e-05	0.000849
Otu305	Otu412	0.146787	0.00086	0.007067
Otu422	Otu431	0.146781	0.00012	0.001497
Otu406	Otu409	0.146761	0.00552	0.028735
Otu324	Otu397	0.146756	0.0067	0.033089
Otu312	Otu313	0.146721	2e-05	0.000324
Otu388	Otu439	0.146708	0	0
Otu349	Otu384	0.146473	0.00596	0.030413
Otu422	Otu424	0.146469	0.00158	0.011267
Otu317	Otu443	0.14644	0.00732	0.035265
Otu340	Otu441	0.146394	0.00344	0.020186
Otu313	Otu352	0.146392	0.00312	0.018759
Otu305	Otu388	0.146369	2e-05	0.000324
Otu420	Otu427	0.14636	4e-05	0.000601
Otu309	Otu384	0.146337	0.00036	0.003581
Otu335	Otu338	0.146218	0.00138	0.010174
Otu355	Otu385	0.146185	0.00294	0.017915
Otu304	Otu409	0.146158	0.00958	0.042374
Otu331	Otu356	0.14615	0.01166	0.04876
Otu411	Otu424	0.146119	0.00522	0.027602
Otu388	Otu406	0.146011	8e-05	0.001073
Otu304	Otu401	0.145921	0.00064	0.005622
Otu425	Otu426	0.145905	0.0014	0.010284
Otu414	Otu439	0.145903	0.00022	0.002431
Otu334	Otu430	0.1459	0.0079	0.03722
Otu358	Otu422	0.145884	0.00026	0.002768
Otu326	Otu349	0.145804	0.00324	0.019331
Otu356	Otu430	0.145799	0.00564	0.029196
Otu353	Otu415	0.14574	0.00444	0.024488
Otu405	Otu417	0.145716	0.00304	0.018389
Otu435	Otu443	0.145688	2e-05	0.000324
Otu307	Otu398	0.145678	2e-05	0.000324
Otu425	Otu430	0.145628	0.00948	0.04208
Otu369	Otu423	0.145583	0.00964	0.042557
Otu350	Otu419	0.145561	0.00732	0.035265
Otu389	Otu401	0.145445	0.00036	0.003581
Otu307	Otu349	0.145421	0.0086	0.039493
Otu420	Otu437	0.145401	0.00652	0.032463
Otu317	Otu429	0.145393	0.00682	0.033512
Otu402	Otu405	0.145287	0.00028	0.002943
Otu397	Otu422	0.145265	0.0021	0.013946
Otu412	Otu425	0.145252	0.00174	0.012087
Otu405	Otu420	0.14525	0.0094	0.041869
Otu352	Otu355	0.145207	0.00842	0.038861
Otu338	Otu383	0.145094	0.0095	0.042146
Otu307	Otu422	0.145049	0.00846	0.038998
Otu358	Otu450	0.144896	0.00094	0.007591
Otu388	Otu403	0.144891	6e-05	0.000849
Otu381	Otu453	0.144794	0.00308	0.018572
Otu305	Otu423	0.144793	0.00496	0.026569
Otu350	Otu400	0.144776	0.00398	0.022551
Otu401	Otu420	0.144671	0.00128	0.009618
Otu357	Otu428	0.144662	0.00754	0.035973
Otu308	Otu334	0.144662	0	0
Otu393	Otu412	0.144579	6e-05	0.000849
Otu349	Otu393	0.144565	0.00024	0.002599
Otu357	Otu421	0.144537	0.00012	0.001497
Otu416	Otu439	0.144469	0	0
Otu353	Otu420	0.144456	0.0096	0.042426
Otu314	Otu334	0.144436	0.00012	0.001497
Otu335	Otu370	0.144428	0.0094	0.041869
Otu338	Otu401	0.144393	0.00038	0.003735
Otu349	Otu449	0.144387	0.00146	0.010611
Otu356	Otu427	0.144377	4e-05	0.000601
Otu310	Otu409	0.144251	0.01138	0.047943
Otu369	Otu435	0.14422	2e-05	0.000324
Otu305	Otu414	0.144198	0.00054	0.004903
Otu356	Otu434	0.144184	0.00954	0.042257
Otu313	Otu345	0.144172	8e-05	0.001073
Otu343	Otu449	0.144145	0.00076	0.006406
Otu318	Otu349	0.144141	0.00028	0.002943
Otu414	Otu423	0.144131	0.00056	0.005049
Otu349	Otu443	0.144108	0.00528	0.027805
Otu350	Otu418	0.144105	0.00044	0.004173
Otu326	Otu450	0.144095	0.0107	0.045825
Otu332	Otu423	0.144072	0.01104	0.04687
Otu350	Otu413	0.144049	0.00118	0.009041
Otu338	Otu386	0.144038	0.00726	0.035056
Otu372	Otu397	0.143966	0.00576	0.029678
Otu310	Otu398	0.143954	0	0
Otu335	Otu358	0.14395	0.00022	0.002431
Otu313	Otu417	0.143893	0.00116	0.008933
Otu369	Otu407	0.143858	0.0004	0.003882
Otu348	Otu421	0.143856	6e-05	0.000849
Otu334	Otu424	0.143848	0.0033	0.01959
Otu313	Otu349	0.143831	0.00268	0.016699
Otu432	Otu437	0.143734	0.0035	0.020453
Otu318	Otu343	0.143576	0.00016	0.001891
Otu314	Otu335	0.143544	2e-05	0.000324
Otu398	Otu437	0.143532	0	0
Otu429	Otu453	0.143522	0.0017	0.011864
Otu350	Otu428	0.143467	0.00148	0.010721
Otu307	Otu389	0.14346	0.00782	0.036944
Otu418	Otu453	0.143456	0.00036	0.003581
Otu308	Otu317	0.143419	2e-05	0.000324
Otu310	Otu312	0.143407	8e-05	0.001073
Otu389	Otu421	0.143398	0	0
Otu398	Otu433	0.143397	4e-05	0.000601
Otu412	Otu444	0.143391	0.00304	0.018389
Otu400	Otu435	0.143381	2e-05	0.000324
Otu309	Otu453	0.143361	0.00018	0.002074
Otu314	Otu403	0.143284	4e-05	0.000601
Otu356	Otu402	0.143278	0.00066	0.005758
Otu350	Otu397	0.143177	0.00118	0.009041
Otu437	Otu453	0.14317	0.002	0.013442
Otu398	Otu413	0.143161	0	0
Otu349	Otu431	0.143134	0.0001	0.001285
Otu398	Otu400	0.143075	4e-05	0.000601
Otu393	Otu406	0.143041	0.00016	0.001891
Otu356	Otu431	0.143025	0.0001	0.001285
Otu312	Otu432	0.142984	2e-05	0.000324
Otu343	Otu403	0.142904	0.00116	0.008933
Otu349	Otu410	0.142899	0.01112	0.047132
Otu318	Otu405	0.142878	0.00052	0.004771
Otu316	Otu426	0.14284	0.00164	0.011569
Otu358	Otu403	0.142758	0.00014	0.001699
Otu356	Otu397	0.142709	0.00298	0.018102
Otu345	Otu439	0.142615	6e-05	0.000849
Otu393	Otu449	0.14261	8e-05	0.001073
Otu343	Otu406	0.1426	0.00144	0.010497
Otu304	Otu352	0.142509	0.0099	0.043407
Otu304	Otu433	0.142502	0.00822	0.038278
Otu343	Otu415	0.142492	0.00216	0.014226
Otu421	Otu437	0.142447	2e-05	0.000324
Otu307	Otu314	0.14219	0.00036	0.003581
Otu393	Otu432	0.142174	0.00026	0.002768
Otu384	Otu389	0.142173	0.00668	0.033016
Otu394	Otu437	0.14217	0.0003	0.003111
Otu402	Otu418	0.142112	0.00014	0.001699
Otu310	Otu329	0.142107	0.0074	0.035517
Otu393	Otu403	0.142014	0.00022	0.002431
Otu313	Otu358	0.141963	0.0003	0.003111
Otu345	Otu437	0.141925	0.00012	0.001497
Otu355	Otu384	0.141902	0.01122	0.047442
Otu353	Otu422	0.1419	0.00604	0.030694
Otu314	Otu339	0.14186	0.00024	0.002599
Otu369	Otu393	0.141837	0.00072	0.006157
Otu415	Otu428	0.141757	0.00246	0.01565
Otu430	Otu441	0.141673	0.00196	0.013227
Otu343	Otu407	0.141652	0.0001	0.001285
Otu335	Otu397	0.141445	0.00144	0.010497
Otu413	Otu437	0.141384	0.00234	0.015066
Otu423	Otu441	0.141305	0.00176	0.012185
Otu304	Otu317	0.141284	0.0106	0.045548
Otu335	Otu412	0.141282	0.00068	0.005889
Otu394	Otu412	0.141104	0.0001	0.001285
Otu388	Otu409	0.141099	0.00026	0.002768
Otu310	Otu427	0.141083	4e-05	0.000601
Otu314	Otu414	0.14107	4e-05	0.000601
Otu308	Otu316	0.141069	0	0
Otu358	Otu443	0.140981	0.00068	0.005889
Otu429	Otu439	0.140972	0.00336	0.019848
Otu314	Otu413	0.140925	0.00018	0.002074
Otu385	Otu417	0.140799	0.0012	0.009159
Otu326	Otu332	0.14079	0.00826	0.038383
Otu308	Otu355	0.140743	0	0
Otu329	Otu345	0.140651	0.00042	0.004026
Otu393	Otu430	0.140611	0.00038	0.003735
Otu307	Otu431	0.14053	0.00026	0.002768
Otu312	Otu317	0.140529	0.00014	0.001699
Otu334	Otu356	0.1405	0.00908	0.040911
Otu353	Otu393	0.140479	0.00034	0.003429
Otu314	Otu355	0.140459	8e-05	0.001073
Otu389	Otu443	0.140398	0.00416	0.023321
Otu310	Otu388	0.140371	0.00018	0.002074
Otu401	Otu435	0.140367	0	0
Otu334	Otu393	0.140343	0.00076	0.006406
Otu350	Otu425	0.140324	0.00682	0.033512
Otu311	Otu329	0.14032	0.0023	0.014876
Otu398	Otu425	0.140311	0.00014	0.001699
Otu398	Otu405	0.140301	0	0
Otu312	Otu335	0.140292	2e-05	0.000324
Otu418	Otu432	0.140233	0.00092	0.007461
Otu309	Otu425	0.140194	0.00092	0.007461
Otu417	Otu427	0.140142	0	0
Otu331	Otu343	0.140091	0.00636	0.031857
Otu412	Otu433	0.140084	0.0021	0.013946
Otu417	Otu430	0.140083	0.0034	0.020024
Otu356	Otu435	0.140079	0	0
Otu398	Otu449	0.139994	2e-05	0.000324
Otu312	Otu413	0.13997	4e-05	0.000601
Otu307	Otu449	0.139908	0.00472	0.025613
Otu310	Otu428	0.139869	0.0043	0.023916
Otu338	Otu402	0.139849	0.00034	0.003429
Otu398	Otu450	0.139848	0.0002	0.002256
Otu330	Otu348	0.139829	0.00336	0.019848
Otu415	Otu421	0.139747	0.0001	0.001285
Otu349	Otu427	0.139744	0	0
Otu326	Otu402	0.139614	0.00064	0.005622
Otu348	Otu432	0.139575	0.00486	0.026152
Otu385	Otu415	0.139571	0.00344	0.020186
Otu389	Otu407	0.139549	0.00024	0.002599
Otu312	Otu400	0.139488	8e-05	0.001073
Otu404	Otu439	0.139388	0.0063	0.031654
Otu322	Otu418	0.13938	0.00242	0.01547
Otu360	Otu424	0.139334	0.00656	0.032602
Otu308	Otu357	0.139322	4e-05	0.000601
Otu402	Otu430	0.13932	0.00032	0.003277
Otu421	Otu423	0.139312	4e-05	0.000601
Otu394	Otu406	0.139186	0.00022	0.002431
Otu321	Otu427	0.139167	2e-05	0.000324
Otu369	Otu401	0.1391	0.0022	0.014402
Otu304	Otu349	0.139074	0.00712	0.034578
Otu311	Otu400	0.139068	0.00212	0.014034
Otu421	Otu450	0.139049	0.0001	0.001285
Otu308	Otu329	0.138972	0	0
Otu426	Otu437	0.138925	0.00078	0.006539
Otu414	Otu432	0.138887	0.00054	0.004903
Otu418	Otu437	0.138844	0.001	0.00798
Otu329	Otu416	0.138733	6e-05	0.000849
Otu316	Otu449	0.138727	0.00634	0.031776
Otu317	Otu421	0.138708	8e-05	0.001073
Otu332	Otu338	0.138662	0.00948	0.04208
Otu335	Otu343	0.13863	0.00176	0.012185
Otu405	Otu453	0.138608	0.00306	0.018477
Otu409	Otu427	0.138567	8e-05	0.001073
Otu387	Otu397	0.138544	0.01048	0.045163
Otu356	Otu388	0.138527	0.00018	0.002074
Otu307	Otu345	0.138445	0.00062	0.005493
Otu317	Otu358	0.138444	0.00102	0.008106
Otu317	Otu426	0.138424	0.00194	0.013126
Otu313	Otu449	0.138418	0.0012	0.009159
Otu314	Otu415	0.138381	6e-05	0.000849
Otu407	Otu439	0.138369	0.00024	0.002599
Otu403	Otu424	0.13831	0.00126	0.009514
Otu407	Otu432	0.13831	0.0001	0.001285
Otu352	Otu414	0.138207	0.00128	0.009618
Otu352	Otu426	0.138192	0.00172	0.011978
Otu413	Otu418	0.138138	0.0013	0.009723
Otu391	Otu406	0.138067	0.011	0.046749
Otu384	Otu397	0.138034	0.00462	0.025223
Otu406	Otu435	0.137981	6e-05	0.000849
Otu357	Otu426	0.137887	0.00328	0.019495
Otu348	Otu437	0.137768	0.00684	0.033584
Otu402	Otu411	0.137689	0.00166	0.011668
Otu317	Otu345	0.137675	0.00064	0.005622
Otu400	Otu407	0.137647	0.00032	0.003277
Otu414	Otu425	0.137618	0.00178	0.012283
Otu391	Otu416	0.137614	8e-05	0.001073
Otu357	Otu416	0.137575	6e-05	0.000849
Otu334	Otu407	0.13756	0.00038	0.003735
Otu379	Otu398	0.137517	2e-05	0.000324
Otu353	Otu423	0.137448	0.00772	0.036619
Otu349	Otu424	0.137432	0.00272	0.016881
Otu349	Otu358	0.137381	0.00078	0.006539
Otu389	Otu415	0.137345	0.0048	0.025906
Otu335	Otu449	0.137262	0.00176	0.012185
Otu394	Otu404	0.137221	0.00084	0.00694
Otu309	Otu356	0.137216	0.00062	0.005493
Otu343	Otu409	0.137194	0.00488	0.02624
Otu348	Otu389	0.137184	0.00594	0.030335
Otu412	Otu453	0.13714	0.00086	0.007067
Otu350	Otu402	0.137132	0.00058	0.005205
Otu343	Otu437	0.137086	0.00258	0.016242
Otu402	Otu403	0.137042	0.00036	0.003581
Otu314	Otu437	0.13703	0.0001	0.001285
Otu321	Otu345	0.137024	0.00048	0.004478
Otu305	Otu418	0.137005	0.00152	0.010959
Otu362	Otu412	0.136966	0.0023	0.014876
Otu385	Otu402	0.136963	0.00068	0.005889
Otu312	Otu434	0.136865	0.00022	0.002431
Otu391	Otu429	0.136862	0.01196	0.049644
Otu391	Otu398	0.136859	0.0001	0.001285
Otu304	Otu424	0.13685	0.00332	0.01968
Otu338	Otu385	0.136833	0.00186	0.01272
Otu313	Otu412	0.136705	0.00074	0.006274
Otu329	Otu429	0.136701	0.00562	0.029121
Otu417	Otu423	0.136695	0.00346	0.020276
Otu432	Otu439	0.136683	0.00326	0.019411
Otu330	Otu352	0.136676	0.00532	0.027948
Otu397	Otu411	0.136671	0.01078	0.046074
Otu403	Otu439	0.136644	0.00168	0.011772
Otu439	Otu443	0.136571	0.00444	0.024488
Otu313	Otu443	0.136568	0.00472	0.025613
Otu335	Otu427	0.13651	4e-05	0.000601
Otu352	Otu430	0.136484	0.01204	0.049863
Otu305	Otu311	0.136412	0.00306	0.018477
Otu406	Otu449	0.136359	0.0019	0.012916
Otu432	Otu434	0.136353	0.01078	0.046074
Otu379	Otu431	0.136343	0.00036	0.003581
Otu356	Otu416	0.136336	6e-05	0.000849
Otu352	Otu443	0.136225	0.0102	0.044344
Otu372	Otu432	0.136215	0.012	0.049748
Otu358	Otu437	0.136201	0.00064	0.005622
Otu354	Otu431	0.136122	0.00042	0.004026
Otu397	Otu453	0.136072	0.00128	0.009618
Otu362	Otu394	0.135994	0.00074	0.006274
Otu338	Otu428	0.135937	0.00194	0.013126
Otu389	Otu393	0.13577	0.00034	0.003429
Otu338	Otu400	0.135765	0.00714	0.03466
Otu317	Otu449	0.135765	0.00522	0.027602
Otu326	Otu352	0.135748	0.00728	0.035132
Otu321	Otu429	0.135736	0.01124	0.047502
Otu334	Otu449	0.135708	0.00466	0.025397
Otu332	Otu335	0.135706	0.00938	0.04181
Otu350	Otu453	0.1357	0.00174	0.012087
Otu304	Otu413	0.135669	0.00406	0.022894
Otu388	Otu389	0.135669	0.00026	0.002768
Otu332	Otu441	0.135648	0.00468	0.025467
Otu345	Otu403	0.135635	0.00016	0.001891
Otu332	Otu385	0.135525	0.0079	0.03722
Otu310	Otu407	0.135451	0.00036	0.003581
Otu402	Otu404	0.135399	0.00158	0.011267
Otu308	Otu332	0.135391	6e-05	0.000849
Otu421	Otu430	0.135357	0.00026	0.002768
Otu310	Otu314	0.135347	0.00022	0.002431
Otu394	Otu400	0.135277	0.00052	0.004771
Otu413	Otu453	0.135264	0.00162	0.011471
Otu384	Otu424	0.135261	0.00446	0.024577
Otu312	Otu403	0.135255	2e-05	0.000324
Otu389	Otu435	0.135254	6e-05	0.000849
Otu305	Otu405	0.135219	0.01032	0.044688
Otu307	Otu407	0.13515	0.00064	0.005622
Otu389	Otu433	0.135107	0.00848	0.039065
Otu405	Otu441	0.135044	0.00334	0.019759
Otu358	Otu400	0.135026	0.00092	0.007461
Otu314	Otu356	0.135022	0.00022	0.002431
Otu345	Otu356	0.134977	0.0004	0.003882
Otu329	Otu356	0.134969	0.00844	0.038928
Otu422	Otu423	0.134932	0.0074	0.035517
Otu326	Otu358	0.134903	0.00058	0.005205
Otu307	Otu318	0.134856	0.0019	0.012916
Otu331	Otu426	0.134674	0.00392	0.022282
Otu330	Otu453	0.134672	0.0019	0.012916
Otu401	Otu415	0.134639	0.00142	0.010385
Otu356	Otu421	0.134533	0.00016	0.001891
Otu312	Otu348	0.134498	6e-05	0.000849
Otu424	Otu450	0.134492	0.00806	0.037801
Otu340	Otu418	0.134478	0.00404	0.022811
Otu385	Otu428	0.134396	0.00198	0.013335
Otu309	Otu437	0.134289	0.0004	0.003882
Otu432	Otu449	0.134212	0.0024	0.015372
Otu413	Otu439	0.134072	0.00268	0.016699
Otu415	Otu435	0.134024	6e-05	0.000849
Otu314	Otu331	0.134017	0.00032	0.003277
Otu313	Otu326	0.134009	0.00356	0.02072
Otu384	Otu426	0.133987	0.00242	0.01547
Otu322	Otu431	0.133802	0.0005	0.004625
Otu330	Otu405	0.133801	0.00506	0.026988
Otu413	Otu419	0.133763	0.00804	0.037719
Otu305	Otu431	0.133626	0.00034	0.003429
Otu433	Otu437	0.133616	0.01078	0.046074
Otu343	Otu439	0.13357	0.00184	0.012608
Otu309	Otu439	0.133533	0.0005	0.004625
Otu313	Otu441	0.133384	0.0018	0.012388
Otu311	Otu406	0.133367	0.00352	0.020545
Otu313	Otu425	0.13335	0.00876	0.039991
Otu318	Otu415	0.133307	0.0012	0.009159
Otu313	Otu414	0.133151	0.00068	0.005889
Otu312	Otu404	0.13294	0.00032	0.003277
Otu314	Otu321	0.132882	0.00024	0.002599
Otu384	Otu407	0.13287	0.00064	0.005622
Otu398	Otu432	0.132823	0.0001	0.001285
Otu422	Otu426	0.13277	0.0022	0.014402
Otu379	Otu417	0.132682	0.00776	0.036747
Otu313	Otu350	0.132679	0.00312	0.018759
Otu320	Otu417	0.132632	0.01128	0.047625
Otu362	Otu418	0.13263	0.00258	0.016242
Otu430	Otu453	0.132624	0.0047	0.025539
Otu321	Otu401	0.132602	0.0026	0.01634
Otu403	Otu418	0.13256	0.00106	0.008356
Otu310	Otu414	0.132516	0.00186	0.01272
Otu318	Otu432	0.132503	0.00084	0.00694
Otu309	Otu334	0.132475	0.00148	0.010721
Otu339	Otu417	0.132398	0.01014	0.044141
Otu402	Otu419	0.13231	0.00154	0.011068
Otu334	Otu431	0.1323	0.00028	0.002943
Otu311	Otu417	0.132216	0.0019	0.012916
Otu384	Otu439	0.132168	0.00804	0.037719
Otu389	Otu397	0.132081	0.00368	0.021248
Otu388	Otu425	0.132052	0.00038	0.003735
Otu369	Otu421	0.131893	0.00016	0.001891
Otu431	Otu439	0.131869	0.0002	0.002256
Otu389	Otu426	0.131829	0.00154	0.011068
Otu316	Otu318	0.131827	0.00212	0.014034
Otu326	Otu425	0.131815	0.01134	0.047821
Otu348	Otu418	0.1318	0.00244	0.015561
Otu398	Otu443	0.13176	0.00012	0.001497
Otu330	Otu406	0.131753	0.00322	0.019226
Otu343	Otu404	0.131701	0.00718	0.034806
Otu403	Otu410	0.131611	0.01012	0.044078
Otu391	Otu418	0.131589	0.00378	0.021671
Otu393	Otu443	0.131522	0.00074	0.006274
Otu379	Otu416	0.131515	8e-05	0.001073
Otu309	Otu403	0.131381	0.00052	0.004771
Otu335	Otu407	0.131327	0.00036	0.003581
Otu449	Otu453	0.131312	0.0017	0.011864
Otu340	Otu431	0.131282	0.00064	0.005622
Otu389	Otu420	0.13121	0.01082	0.046203
Otu349	Otu421	0.131175	0.00016	0.001891
Otu313	Otu338	0.131035	0.0036	0.020895
Otu317	Otu343	0.130608	0.00708	0.034449
[truncated: 1,104 more rows]
