# Supplementary material
Source: HighWire-hosted journal article supplement (https://gut.bmj.com/content/gutjnl-2018-317178)
Supplement: inline-supplementary-material-16 [file inline-supplementary-material-16.xls]

## Sheet: Supplementary table 12
Supplementary table 12: Correlations within fungal familes in Independent Chinese cohort V1_Control
OtuId_1	OtuId_2	Correlation_coefficient	P_value	Q_value
Otu374	Otu378	0.606553	1.66115e-07	2.75276e-06
Otu340	Otu450	0.601951	1.66115e-07	2.75276e-06
Otu366	Otu378	0.555023	1.66115e-07	2.75276e-06
Otu340	Otu384	0.538311	1.66115e-07	2.75276e-06
Otu337	Otu361	0.525038	1.66115e-07	2.75276e-06
Otu340	Otu395	0.514273	1.66115e-07	2.75276e-06
Otu366	Otu374	0.504129	1.66115e-07	2.75276e-06
Otu327	Otu440	0.501522	1.66115e-07	2.75276e-06
Otu384	Otu450	0.497956	1.66115e-07	2.75276e-06
Otu344	Otu408	0.490264	1.66115e-07	2.75276e-06
Otu395	Otu450	0.48264	1.66115e-07	2.75276e-06
Otu366	Otu367	0.474936	1.66115e-07	2.75276e-06
Otu378	Otu382	0.465504	1.66115e-07	2.75276e-06
Otu359	Otu361	0.461899	1.66115e-07	2.75276e-06
Otu351	Otu378	0.455744	1.66115e-07	2.75276e-06
Otu340	Otu391	0.455673	1.66115e-07	2.75276e-06
Otu359	Otu450	0.450551	1.66115e-07	2.75276e-06
Otu363	Otu440	0.441785	1.66115e-07	2.75276e-06
Otu374	Otu377	0.439374	1.66115e-07	2.75276e-06
Otu374	Otu382	0.434674	1.66115e-07	2.75276e-06
Otu364	Otu440	0.431409	1.66115e-07	2.75276e-06
Otu340	Otu359	0.429604	1.66115e-07	2.75276e-06
Otu363	Otu367	0.428122	1.66115e-07	2.75276e-06
Otu341	Otu451	0.413128	1.66115e-07	2.75276e-06
Otu327	Otu363	0.410849	1.66115e-07	2.75276e-06
Otu361	Otu452	0.408759	0.0001	0.00138087
Otu346	Otu408	0.400411	1.66115e-07	2.75276e-06
Otu351	Otu374	0.39943	1.66115e-07	2.75276e-06
Otu327	Otu337	0.398697	1.66115e-07	2.75276e-06
Otu351	Otu382	0.394093	1.66115e-07	2.75276e-06
Otu342	Otu371	0.392448	1.66115e-07	2.75276e-06
Otu373	Otu445	0.390813	1.66115e-07	2.75276e-06
Otu377	Otu378	0.382685	1.66115e-07	2.75276e-06
Otu327	Otu364	0.380662	1.66115e-07	2.75276e-06
Otu333	Otu346	0.37743	0.0001	0.00138087
Otu374	Otu390	0.377176	1.66115e-07	2.75276e-06
Otu337	Otu440	0.372873	1.66115e-07	2.75276e-06
Otu378	Otu383	0.372536	1.66115e-07	2.75276e-06
Otu363	Otu364	0.368288	1.66115e-07	2.75276e-06
Otu342	Otu360	0.366407	1.66115e-07	2.75276e-06
Otu332	Otu342	0.365344	0.0001	0.00138087
Otu366	Otu440	0.360904	0.0002	0.00247021
Otu342	Otu444	0.360331	1.66115e-07	2.75276e-06
Otu337	Otu371	0.358219	1.66115e-07	2.75276e-06
Otu359	Otu384	0.355855	1.66115e-07	2.75276e-06
Otu373	Otu452	0.355029	1.66115e-07	2.75276e-06
Otu321	Otu339	0.354222	1.66115e-07	2.75276e-06
Otu337	Otu364	0.348872	1.66115e-07	2.75276e-06
Otu391	Otu450	0.347985	1.66115e-07	2.75276e-06
Otu391	Otu395	0.346006	1.66115e-07	2.75276e-06
Otu337	Otu444	0.34374	0.0001	0.00138087
Otu351	Otu377	0.340922	1.66115e-07	2.75276e-06
Otu373	Otu438	0.340018	0.0002	0.00247021
Otu359	Otu391	0.339638	1.66115e-07	2.75276e-06
Otu341	Otu440	0.338277	0.0002	0.00247021
Otu354	Otu382	0.33808	1.66115e-07	2.75276e-06
Otu438	Otu450	0.337258	1.66115e-07	2.75276e-06
Otu351	Otu366	0.33576	0.0001	0.00138087
Otu378	Otu390	0.335461	1.66115e-07	2.75276e-06
Otu340	Otu423	0.331559	1.66115e-07	2.75276e-06
Otu337	Otu342	0.330808	0.0003	0.00343897
Otu319	Otu327	0.326843	0.0001	0.00138087
Otu384	Otu395	0.326516	1.66115e-07	2.75276e-06
Otu361	Otu384	0.326073	0.0001	0.00138087
Otu364	Otu367	0.323545	0.0002	0.00247021
Otu364	Otu366	0.322164	0.0002	0.00247021
Otu323	Otu444	0.320893	1.66115e-07	2.75276e-06
Otu360	Otu371	0.318062	0.0003	0.00343897
Otu342	Otu376	0.317385	0.0002	0.00247021
Otu361	Otu371	0.316748	0.0005	0.00515914
Otu347	Otu387	0.316326	0.0001	0.00138087
Otu340	Otu438	0.316147	0.0002	0.00247021
Otu337	Otu367	0.315661	0.0002	0.00247021
Otu434	Otu442	0.315175	0.0002	0.00247021
Otu364	Otu374	0.314841	0.0003	0.00343897
Otu359	Otu438	0.314145	0.0003	0.00343897
Otu327	Otu328	0.312975	0.0003	0.00343897
Otu376	Otu378	0.31194	0.0003	0.00343897
Otu391	Otu438	0.310516	0.0002	0.00247021
Otu357	Otu412	0.310237	1.66115e-07	2.75276e-06
Otu337	Otu446	0.309565	1.66115e-07	2.75276e-06
Otu341	Otu442	0.309141	0.0001	0.00138087
Otu351	Otu354	0.30906	0.0002	0.00247021
Otu354	Otu442	0.307674	0.0002	0.00247021
Otu336	Otu386	0.306591	0.0001	0.00138087
Otu327	Otu361	0.306169	0.0003	0.00343897
Otu385	Otu438	0.305733	1.66115e-07	2.75276e-06
Otu344	Otu448	0.305186	0.0003	0.00343897
Otu383	Otu390	0.304471	0.0002	0.00247021
Otu373	Otu411	0.304362	1.66115e-07	2.75276e-06
Otu374	Otu383	0.303774	0.0001	0.00138087
Otu377	Otu390	0.303292	0.0002	0.00247021
Otu367	Otu376	0.301517	0.0004	0.00432614
Otu384	Otu391	0.301359	0.0001	0.00138087
Otu329	Otu437	0.301144	1.66115e-07	2.75276e-06
Otu374	Otu440	0.300248	0.0004	0.00432614
Otu361	Otu440	0.299175	0.0009	0.00810166
Otu354	Otu374	0.297859	0.0003	0.00343897
Otu366	Otu390	0.296274	0.0004	0.00432614
Otu379	Otu380	0.295772	0.0001	0.00138087
Otu320	Otu451	0.295525	0.0001	0.00138087
Otu384	Otu433	0.29531	1.66115e-07	2.75276e-06
Otu373	Otu375	0.294875	0.0001	0.00138087
Otu366	Otu377	0.293243	0.0003	0.00343897
Otu332	Otu360	0.292928	0.0002	0.00247021
Otu313	Otu437	0.292776	1.66115e-07	2.75276e-06
Otu411	Otu438	0.290786	0.0003	0.00343897
Otu364	Otu451	0.290722	0.0006	0.0059499
Otu404	Otu439	0.289351	1.66115e-07	2.75276e-06
Otu352	Otu424	0.289261	1.66115e-07	2.75276e-06
Otu315	Otu436	0.288847	0.0002	0.00247021
Otu420	Otu438	0.287901	1.66115e-07	2.75276e-06
Otu337	Otu363	0.287161	0.0007	0.00669262
Otu367	Otu440	0.2865	0.0006	0.0059499
Otu336	Otu447	0.286434	0.0001	0.00138087
Otu377	Otu382	0.286392	0.0005	0.00515914
Otu367	Otu378	0.285479	0.0008	0.00739993
Otu328	Otu363	0.285222	0.0003	0.00343897
Otu347	Otu371	0.284688	0.0008	0.00739993
Otu366	Otu382	0.284551	0.0011	0.0094326
Otu327	Otu371	0.284284	0.0011	0.0094326
Otu346	Otu382	0.283324	0.0008	0.00739993
Otu371	Otu380	0.282546	0.0005	0.00515914
Otu361	Otu451	0.282514	0.001	0.00878103
Otu366	Otu383	0.282172	0.0004	0.00432614
Otu375	Otu438	0.281238	0.0008	0.00739993
Otu361	Otu395	0.281008	0.0006	0.0059499
Otu371	Otu452	0.280518	0.0013	0.010715
Otu337	Otu445	0.279652	0.001	0.00878103
Otu320	Otu364	0.279473	0.0004	0.00432614
Otu345	Otu450	0.279118	1.66115e-07	2.75276e-06
Otu363	Otu366	0.27849	0.0013	0.010715
Otu359	Otu395	0.277833	0.0009	0.00810166
Otu339	Otu377	0.277683	0.0001	0.00138087
Otu337	Otu359	0.277681	0.0005	0.00515914
Otu361	Otu446	0.277458	0.0002	0.00247021
Otu345	Otu375	0.277332	1.66115e-07	2.75276e-06
Otu375	Otu444	0.275952	0.0008	0.00739993
Otu367	Otu368	0.275123	0.001	0.00878103
Otu333	Otu344	0.274498	0.0031	0.0206434
Otu389	Otu412	0.274198	1.66115e-07	2.75276e-06
Otu347	Otu364	0.274083	0.0008	0.00739993
Otu337	Otu451	0.273883	0.0013	0.010715
Otu337	Otu442	0.27383	0.0025	0.0175798
Otu328	Otu396	0.273461	0.0013	0.010715
Otu377	Otu383	0.27273	0.0009	0.00810166
Otu313	Otu329	0.272491	1.66115e-07	2.75276e-06
Otu442	Otu444	0.272039	0.0008	0.00739993
Otu400	Otu419	0.271319	0.0006	0.0059499
Otu337	Otu360	0.270499	0.0011	0.0094326
Otu368	Otu383	0.270204	0.0005	0.00515914
Otu345	Otu373	0.270056	1.66115e-07	2.75276e-06
Otu366	Otu368	0.269821	0.001	0.00878103
Otu366	Otu376	0.269756	0.0017	0.0130938
Otu359	Otu451	0.26953	0.0016	0.0125109
Otu345	Otu412	0.269112	1.66115e-07	2.75276e-06
Otu361	Otu444	0.268811	0.0011	0.0094326
Otu342	Otu367	0.26835	0.001	0.00878103
Otu345	Otu438	0.268075	1.66115e-07	2.75276e-06
Otu319	Otu363	0.267704	0.0019	0.0142483
Otu442	Otu452	0.266548	0.0013	0.010715
Otu357	Otu445	0.266015	0.001	0.00878103
Otu363	Otu387	0.265106	0.0012	0.0100882
Otu337	Otu452	0.264674	0.0021	0.0153809
Otu409	Otu442	0.26467	0.0002	0.00247021
Otu359	Otu411	0.263947	0.0006	0.0059499
Otu370	Otu449	0.26359	0.0001	0.00138087
Otu342	Otu375	0.263447	0.0008	0.00739993
Otu336	Otu381	0.263289	1.66115e-07	2.75276e-06
Otu395	Otu423	0.263174	0.0002	0.00247021
Otu382	Otu444	0.262866	0.0006	0.0059499
Otu339	Otu451	0.261274	0.0006	0.0059499
Otu315	Otu442	0.261229	0.0013	0.010715
Otu340	Otu433	0.261215	0.0002	0.00247021
Otu417	Otu450	0.26119	0.0005	0.00515914
Otu361	Otu364	0.261058	0.0021	0.0153809
Otu371	Otu444	0.260659	0.0007	0.00669262
Otu328	Otu442	0.260465	0.0021	0.0153809
Otu370	Otu378	0.259849	0.0019	0.0142483
Otu373	Otu420	0.25957	0.0001	0.00138087
Otu357	Otu450	0.259456	0.001	0.00878103
Otu337	Otu420	0.259265	0.0003	0.00343897
Otu360	Otu444	0.259129	0.0017	0.0130938
Otu407	Otu433	0.258283	1.66115e-07	2.75276e-06
Otu337	Otu341	0.258123	0.0027	0.0186129
Otu332	Otu411	0.257549	0.0003	0.00343897
Otu336	Otu370	0.257469	0.0012	0.0100882
Otu305	Otu355	0.257216	0.0001	0.00138087
Otu332	Otu438	0.256942	0.0006	0.0059499
Otu380	Otu446	0.256737	0.0003	0.00343897
Otu351	Otu383	0.256558	0.0014	0.0113268
Otu361	Otu442	0.256257	0.0022	0.0159467
Otu351	Otu452	0.256177	0.0017	0.0130938
Otu368	Otu440	0.255866	0.0017	0.0130938
Otu363	Otu368	0.255715	0.0017	0.0130938
Otu351	Otu442	0.255335	0.002	0.0148159
Otu423	Otu450	0.25507	0.0001	0.00138087
Otu370	Otu411	0.254952	0.001	0.00878103
Otu445	Otu452	0.254261	0.0021	0.0153809
Otu413	Otu438	0.254159	1.66115e-07	2.75276e-06
Otu341	Otu434	0.253639	0.001	0.00878103
Otu342	Otu363	0.253277	0.0028	0.0191182
Otu342	Otu392	0.253076	0.0016	0.0125109
Otu354	Otu452	0.252328	0.0016	0.0125109
Otu428	Otu439	0.251927	1.66115e-07	2.75276e-06
Otu433	Otu450	0.2519	0.0002	0.00247021
Otu445	Otu450	0.250195	0.0021	0.0153809
Otu370	Otu386	0.249749	0.0007	0.00669262
Otu344	Otu346	0.249079	0.0043	0.0261821
Otu365	Otu452	0.248995	0.0028	0.0191182
Otu339	Otu374	0.248893	0.0007	0.00669262
Otu412	Otu414	0.248495	1.66115e-07	2.75276e-06
Otu387	Otu444	0.248401	0.0016	0.0125109
Otu342	Otu357	0.247586	0.0021	0.0153809
Otu359	Otu433	0.247491	0.0005	0.00515914
Otu319	Otu373	0.247293	0.0018	0.0136636
Otu412	Otu416	0.246766	1.66115e-07	2.75276e-06
Otu440	Otu451	0.245919	0.0039	0.0244085
Otu367	Otu390	0.245505	0.0024	0.0170523
Otu388	Otu438	0.245046	1.66115e-07	2.75276e-06
Otu319	Otu329	0.244672	0.0014	0.0113268
Otu361	Otu380	0.244619	0.0043	0.0261821
Otu351	Otu370	0.244352	0.0036	0.0230307
Otu375	Otu387	0.244338	0.0015	0.0119349
Otu371	Otu376	0.243994	0.0031	0.0206434
Otu322	Otu377	0.243989	0.0013	0.010715
Otu341	Otu452	0.243861	0.0035	0.0225616
Otu354	Otu370	0.243602	0.0025	0.0175798
Otu384	Otu407	0.243451	1.66115e-07	2.75276e-06
Otu337	Otu415	0.243327	0.0005	0.00515914
Otu351	Otu390	0.243237	0.0026	0.0181064
Otu364	Otu390	0.24322	0.0038	0.0239599
Otu339	Otu365	0.242895	0.0026	0.0181064
Otu341	Otu373	0.242764	0.0013	0.010715
Otu324	Otu447	0.242572	0.0011	0.0094326
Otu332	Otu420	0.242547	0.0005	0.00515914
Otu390	Otu419	0.242455	0.0027	0.0186129
Otu357	Otu417	0.241878	0.0006	0.0059499
Otu354	Otu365	0.241725	0.0029	0.0196269
Otu367	Otu371	0.241547	0.0041	0.0253075
Otu436	Otu442	0.24115	0.0028	0.0191182
Otu377	Otu440	0.241144	0.0037	0.023522
Otu341	Otu377	0.24102	0.0017	0.0130938
Otu420	Otu452	0.240859	0.0003	0.00343897
Otu444	Otu452	0.240769	0.0029	0.0196269
Otu357	Otu420	0.240204	0.0005	0.00515914
Otu375	Otu411	0.240185	0.0012	0.0100882
Otu308	Otu413	0.23945	1.66115e-07	2.75276e-06
Otu385	Otu450	0.239211	0.0004	0.00432614
Otu320	Otu368	0.239168	0.0016	0.0125109
Otu306	Otu346	0.238869	0.0054	0.0307972
Otu412	Otu450	0.238753	1.66115e-07	2.75276e-06
Otu338	Otu446	0.237479	1.66115e-07	2.75276e-06
Otu438	Otu445	0.23736	0.0037	0.023522
Otu326	Otu357	0.237303	0.0009	0.00810166
Otu345	Otu416	0.236472	1.66115e-07	2.75276e-06
Otu371	Otu379	0.235794	0.0023	0.0164975
Otu342	Otu442	0.235776	0.004	0.0248747
Otu383	Otu419	0.235736	0.0022	0.0159467
Otu329	Otu443	0.235713	0.0001	0.00138087
Otu316	Otu323	0.235626	0.0022	0.0159467
Otu367	Otu374	0.23492	0.0046	0.0274824
Otu333	Otu359	0.23478	0.0082	0.041314
Otu411	Otu423	0.23471	0.0006	0.0059499
Otu360	Otu376	0.234575	0.0026	0.0181064
Otu320	Otu337	0.234529	0.0037	0.023522
Otu340	Otu361	0.234365	0.0055	0.031199
Otu359	Otu371	0.233846	0.0052	0.030033
Otu387	Otu442	0.233128	0.0039	0.0244085
Otu339	Otu366	0.233121	0.0021	0.0153809
Otu382	Otu390	0.232752	0.0045	0.0270333
Otu384	Otu418	0.232275	0.0001	0.00138087
Otu420	Otu449	0.23123	0.0001	0.00138087
Otu412	Otu413	0.230765	1.66115e-07	2.75276e-06
Otu347	Otu361	0.230726	0.0071	0.0374085
Otu375	Otu389	0.230674	0.0005	0.00515914
Otu365	Otu376	0.230655	0.0051	0.0295991
Otu360	Otu381	0.230326	0.0012	0.0100882
Otu370	Otu444	0.230198	0.0032	0.0211307
Otu342	Otu364	0.230142	0.0057	0.0319914
Otu352	Otu433	0.230004	0.0008	0.00739993
Otu443	Otu445	0.229799	0.0008	0.00739993
Otu412	Otu417	0.229752	0.0002	0.00247021
Otu332	Otu418	0.22888	0.0004	0.00432614
Otu398	Otu431	0.228018	1.66115e-07	2.75276e-06
Otu389	Otu443	0.227932	0.0002	0.00247021
Otu323	Otu452	0.227671	0.0049	0.0287612
Otu384	Otu429	0.227341	0.0006	0.0059499
Otu357	Otu449	0.227272	0.0007	0.00669262
Otu420	Otu446	0.227168	0.0004	0.00432614
Otu389	Otu431	0.22685	1.66115e-07	2.75276e-06
Otu337	Otu387	0.226666	0.0055	0.031199
Otu337	Otu347	0.226287	0.0069	0.0366946
Otu392	Otu444	0.226014	0.0026	0.0181064
Otu407	Otu412	0.225504	1.66115e-07	2.75276e-06
Otu342	Otu387	0.224831	0.0068	0.0363118
Otu375	Otu437	0.224727	0.0011	0.0094326
Otu357	Otu373	0.224669	0.0035	0.0225616
Otu350	Otu357	0.224513	0.0003	0.00343897
Otu398	Otu402	0.224466	1.66115e-07	2.75276e-06
Otu337	Otu374	0.223766	0.0073	0.038115
Otu320	Otu442	0.223755	0.0038	0.0239599
Otu451	Otu452	0.223705	0.007	0.0370379
Otu332	Otu359	0.22369	0.0036	0.0230307
Otu437	Otu438	0.22354	0.0025	0.0175798
Otu363	Otu376	0.223501	0.0055	0.031199
Otu320	Otu341	0.223102	0.0037	0.023522
Otu328	Otu383	0.222975	0.0053	0.0303945
Otu361	Otu450	0.222918	0.0056	0.0315894
Otu341	Otu409	0.222551	0.0029	0.0196269
Otu388	Otu420	0.222389	1.66115e-07	2.75276e-06
Otu345	Otu406	0.222198	1.66115e-07	2.75276e-06
Otu425	Otu437	0.222042	0.0001	0.00138087
Otu324	Otu331	0.222002	0.0039	0.0244085
Otu345	Otu389	0.221881	1.66115e-07	2.75276e-06
Otu330	Otu389	0.22169	1.66115e-07	2.75276e-06
Otu354	Otu444	0.220843	0.0028	0.0191182
Otu341	Otu342	0.220763	0.008	0.0406141
Otu308	Otu309	0.220298	1.66115e-07	2.75276e-06
Otu375	Otu445	0.220264	0.0057	0.0319914
Otu319	Otu445	0.220228	0.0079	0.0402662
Otu308	Otu314	0.220101	1.66115e-07	2.75276e-06
Otu382	Otu452	0.220037	0.0076	0.03917
Otu371	Otu445	0.220023	0.0086	0.0426637
Otu352	Otu425	0.219872	0.0003	0.00343897
Otu318	Otu450	0.219746	1.66115e-07	2.75276e-06
Otu359	Otu423	0.219679	0.0024	0.0170523
Otu376	Otu390	0.219458	0.0056	0.0315894
Otu330	Otu342	0.219371	0.0023	0.0164975
Otu380	Otu451	0.219217	0.005	0.0291908
Otu327	Otu434	0.218968	0.0053	0.0303945
Otu433	Otu438	0.218805	0.0031	0.0206434
Otu339	Otu440	0.218737	0.0035	0.0225616
Otu373	Otu437	0.218047	0.0011	0.0094326
Otu355	Otu379	0.218042	0.0015	0.0119349
Otu370	Otu382	0.217745	0.0066	0.0355236
Otu307	Otu357	0.217664	0.0024	0.0170523
Otu413	Otu420	0.217569	0.0001	0.00138087
Otu314	Otu358	0.217207	1.66115e-07	2.75276e-06
Otu323	Otu353	0.217032	0.0026	0.0181064
Otu330	Otu449	0.216801	0.0004	0.00432614
Otu433	Otu446	0.216763	0.0008	0.00739993
Otu438	Otu443	0.216149	0.0035	0.0225616
Otu413	Otu450	0.216026	1.66115e-07	2.75276e-06
Otu341	Otu374	0.21573	0.0076	0.03917
Otu338	Otu422	0.215534	0.0008	0.00739993
Otu337	Otu370	0.215447	0.0094	0.0453534
Otu305	Otu412	0.215439	0.0001	0.00138087
Otu372	Otu380	0.215134	0.003	0.020132
Otu346	Otu351	0.214954	0.0089	0.0437009
Otu352	Otu452	0.214835	0.0043	0.0261821
Otu364	Otu434	0.214735	0.0062	0.0339653
Otu382	Otu383	0.214661	0.0064	0.0347596
Otu320	Otu347	0.214495	0.0058	0.0323946
Otu328	Otu337	0.214315	0.0106	0.0493164
Otu420	Otu445	0.213993	0.0014	0.0113268
Otu357	Otu389	0.21349	0.0004	0.00432614
Otu337	Otu376	0.212828	0.0107	0.0496283
Otu332	Otu337	0.212791	0.0074	0.0384762
Otu330	Otu437	0.212667	0.0009	0.00810166
Otu330	Otu375	0.212596	0.0012	0.0100882
Otu352	Otu375	0.212541	0.0029	0.0196269
Otu354	Otu378	0.212433	0.0074	0.0384762
Otu351	Otu396	0.212383	0.0083	0.041664
Otu412	Otu420	0.212208	0.0002	0.00247021
Otu389	Otu438	0.212078	0.0006	0.0059499
Otu414	Otu416	0.211915	1.66115e-07	2.75276e-06
Otu341	Otu361	0.211862	0.0106	0.0493164
Otu388	Otu414	0.211646	1.66115e-07	2.75276e-06
Otu373	Otu416	0.211643	1.66115e-07	2.75276e-06
Otu351	Otu444	0.211554	0.0053	0.0303945
Otu438	Otu452	0.211552	0.0105	0.0489981
Otu323	Otu324	0.211431	0.0061	0.0335485
Otu321	Otu341	0.211345	0.0041	0.0253075
Otu389	Otu420	0.21111	0.0002	0.00247021
Otu332	Otu450	0.211004	0.0055	0.031199
Otu384	Otu413	0.210935	1.66115e-07	2.75276e-06
Otu370	Otu374	0.210785	0.0075	0.0388109
Otu314	Otu413	0.210509	1.66115e-07	2.75276e-06
Otu305	Otu428	0.210496	0.0002	0.00247021
Otu308	Otu438	0.210456	1.66115e-07	2.75276e-06
Otu345	Otu453	0.21043	1.66115e-07	2.75276e-06
Otu342	Otu370	0.210401	0.0097	0.0463465
Otu357	Otu432	0.210178	0.0002	0.00247021
Otu391	Otu423	0.210049	0.002	0.0148159
Otu333	Otu408	0.209902	0.0066	0.0355236
Otu363	Otu442	0.209627	0.008	0.0406141
Otu407	Otu438	0.209609	0.0003	0.00343897
Otu337	Otu373	0.209333	0.009	0.0440399
Otu402	Otu431	0.20908	1.66115e-07	2.75276e-06
Otu330	Otu420	0.208953	0.001	0.00878103
Otu341	Otu364	0.208785	0.0095	0.0456723
Otu362	Otu400	0.208546	0.0016	0.0125109
Otu421	Otu427	0.208385	1.66115e-07	2.75276e-06
Otu329	Otu425	0.208159	0.0011	0.0094326
Otu407	Otu450	0.207989	1.66115e-07	2.75276e-06
Otu321	Otu374	0.207564	0.0042	0.0257508
Otu341	Otu376	0.20752	0.0071	0.0374085
Otu354	Otu436	0.207245	0.0088	0.0433346
Otu345	Otu431	0.206991	1.66115e-07	2.75276e-06
Otu332	Otu424	0.206943	0.0009	0.00810166
Otu413	Otu416	0.206743	1.66115e-07	2.75276e-06
Otu389	Otu411	0.206542	0.0008	0.00739993
Otu316	Otu317	0.206335	0.0036	0.0230307
Otu385	Otu420	0.20588	0.0006	0.0059499
Otu424	Otu432	0.205857	1.66115e-07	2.75276e-06
Otu365	Otu442	0.205807	0.0094	0.0453534
Otu385	Otu428	0.20542	0.0003	0.00343897
Otu345	Otu357	0.205322	0.0007	0.00669262
Otu308	Otu358	0.205295	1.66115e-07	2.75276e-06
Otu345	Otu355	0.205245	0.0002	0.00247021
Otu345	Otu413	0.204857	1.66115e-07	2.75276e-06
Otu387	Otu447	0.204741	0.0061	0.0335485
Otu354	Otu390	0.204666	0.0075	0.0388109
Otu372	Otu381	0.204517	0.0028	0.0191182
Otu345	Otu417	0.204464	0.0004	0.00432614
Otu370	Otu396	0.204463	0.0103	0.0483491
Otu364	Otu444	0.204214	0.0081	0.0409674
Otu318	Otu345	0.204212	1.66115e-07	2.75276e-06
Otu318	Otu413	0.204098	1.66115e-07	2.75276e-06
Otu376	Otu377	0.204077	0.01	0.0473665
Otu335	Otu412	0.203809	1.66115e-07	2.75276e-06
Otu380	Otu444	0.20379	0.0051	0.0295991
Otu331	Otu339	0.203745	0.0058	0.0323946
Otu402	Otu413	0.203319	1.66115e-07	2.75276e-06
Otu322	Otu411	0.203085	0.005	0.0291908
Otu345	Otu407	0.203033	1.66115e-07	2.75276e-06
Otu339	Otu360	0.20303	0.0085	0.0423255
Otu401	Otu417	0.202952	0.001	0.00878103
Otu384	Otu438	0.202827	0.0108	0.0499157
Otu390	Otu442	0.202542	0.009	0.0440399
Otu321	Otu365	0.202438	0.0057	0.0319914
Otu343	Otu373	0.202401	0.0019	0.0142483
Otu327	Otu446	0.202041	0.0048	0.0283645
Otu332	Otu375	0.201997	0.0071	0.0374085
Otu392	Otu411	0.201955	0.0044	0.0266341
Otu335	Otu406	0.201874	1.66115e-07	2.75276e-06
Otu368	Otu374	0.201838	0.009	0.0440399
Otu365	Otu420	0.201586	0.0033	0.0216375
Otu330	Otu412	0.201517	0.0001	0.00138087
Otu385	Otu437	0.201508	0.0005	0.00515914
Otu413	Otu431	0.20082	1.66115e-07	2.75276e-06
Otu357	Otu438	0.200603	0.01	0.0473665
Otu345	Otu433	0.200568	0.0003	0.00343897
Otu388	Otu416	0.200533	1.66115e-07	2.75276e-06
Otu336	Otu352	0.200016	0.0044	0.0266341
Otu305	Otu375	0.199375	0.0034	0.0221203
Otu395	Otu405	0.199292	0.0026	0.0181064
Otu413	Otu414	0.199114	1.66115e-07	2.75276e-06
Otu330	Otu444	0.198828	0.0028	0.0191182
Otu314	Otu398	0.198554	1.66115e-07	2.75276e-06
Otu345	Otu401	0.198552	1.66115e-07	2.75276e-06
Otu337	Otu379	0.198055	0.0077	0.0395659
Otu340	Otu397	0.198009	0.0016	0.0125109
Otu418	Otu433	0.197879	0.0005	0.00515914
Otu388	Otu393	0.197872	1.66115e-07	2.75276e-06
Otu339	Otu368	0.197578	0.0073	0.038115
Otu388	Otu413	0.197362	1.66115e-07	2.75276e-06
Otu332	Otu370	0.197361	0.0093	0.0450109
Otu320	Otu373	0.197318	0.0057	0.0319914
Otu360	Otu420	0.197144	0.0034	0.0221203
Otu309	Otu340	0.197142	1.66115e-07	2.75276e-06
Otu339	Otu371	0.197016	0.0101	0.0476792
Otu339	Otu383	0.196984	0.0074	0.0384762
Otu412	Otu431	0.19696	0.0001	0.00138087
Otu324	Otu359	0.196779	0.0108	0.0499157
Otu323	Otu373	0.196778	0.0086	0.0426637
Otu373	Otu412	0.196724	0.001	0.00878103
Otu322	Otu375	0.196496	0.0087	0.0429765
Otu330	Otu443	0.196272	0.0013	0.010715
Otu332	Otu357	0.196234	0.0083	0.041664
Otu402	Otu412	0.196192	1.66115e-07	2.75276e-06
Otu381	Otu432	0.196103	0.0009	0.00810166
Otu411	Otu449	0.19607	0.0033	0.0216375
Otu352	Otu447	0.196059	0.0034	0.0221203
Otu330	Otu452	0.195585	0.0067	0.0358995
Otu335	Otu413	0.195512	1.66115e-07	2.75276e-06
Otu308	Otu435	0.19544	1.66115e-07	2.75276e-06
Otu437	Otu452	0.195171	0.0053	0.0303945
Otu314	Otu417	0.195139	1.66115e-07	2.75276e-06
Otu351	Otu352	0.195078	0.0064	0.0347596
Otu373	Otu444	0.19504	0.0098	0.0466892
Otu332	Otu345	0.19498	0.0007	0.00669262
Otu373	Otu446	0.19493	0.0056	0.0315894
Otu411	Otu444	0.194891	0.0091	0.0443638
Otu352	Otu385	0.194739	0.0006	0.0059499
Otu420	Otu441	0.194615	0.0003	0.00343897
Otu391	Otu433	0.194347	0.0043	0.0261821
Otu351	Otu368	0.194155	0.0102	0.0479941
Otu398	Otu412	0.193983	1.66115e-07	2.75276e-06
Otu407	Otu418	0.193927	0.0001	0.00138087
Otu388	Otu427	0.193731	1.66115e-07	2.75276e-06
Otu357	Otu437	0.193567	0.006	0.0331983
Otu349	Otu372	0.193551	0.0026	0.0181064
Otu326	Otu331	0.1934	0.0043	0.0261821
Otu314	Otu412	0.193357	1.66115e-07	2.75276e-06
Otu345	Otu350	0.192572	0.0001	0.00138087
Otu393	Otu420	0.192568	0.0005	0.00515914
Otu358	Otu418	0.192529	1.66115e-07	2.75276e-06
Otu416	Otu435	0.191903	1.66115e-07	2.75276e-06
Otu330	Otu411	0.191744	0.0037	0.023522
Otu324	Otu443	0.191559	0.0042	0.0257508
Otu358	Otu416	0.191379	1.66115e-07	2.75276e-06
Otu353	Otu357	0.191349	0.0055	0.031199
Otu412	Otu437	0.19115	0.0002	0.00247021
Otu307	Otu445	0.190616	0.0103	0.0483491
Otu308	Otu318	0.190518	1.66115e-07	2.75276e-06
Otu308	Otu412	0.190327	1.66115e-07	2.75276e-06
Otu408	Otu448	0.190122	0.0107	0.0496283
Otu322	Otu380	0.190065	0.0107	0.0496283
Otu321	Otu409	0.190024	0.0046	0.0274824
Otu360	Otu446	0.190016	0.0056	0.0315894
Otu335	Otu407	0.18962	1.66115e-07	2.75276e-06
Otu416	Otu427	0.189593	1.66115e-07	2.75276e-06
Otu318	Otu401	0.189211	1.66115e-07	2.75276e-06
Otu384	Otu428	0.189063	0.0019	0.0142483
Otu320	Otu380	0.188806	0.0095	0.0456723
Otu314	Otu345	0.188799	1.66115e-07	2.75276e-06
Otu326	Otu423	0.188096	0.0027	0.0186129
Otu321	Otu451	0.187815	0.0091	0.0443638
Otu371	Otu415	0.187327	0.006	0.0331983
Otu358	Otu388	0.187008	1.66115e-07	2.75276e-06
Otu314	Otu435	0.186979	1.66115e-07	2.75276e-06
Otu418	Otu450	0.186811	0.0016	0.0125109
Otu318	Otu416	0.186796	1.66115e-07	2.75276e-06
Otu323	Otu425	0.186656	0.0059	0.0327992
Otu332	Otu432	0.186541	0.0011	0.0094326
Otu318	Otu418	0.186538	1.66115e-07	2.75276e-06
Otu350	Otu450	0.186501	0.0024	0.0170523
Otu358	Otu412	0.186207	1.66115e-07	2.75276e-06
Otu355	Otu395	0.18615	0.0103	0.0483491
Otu388	Otu426	0.186125	1.66115e-07	2.75276e-06
Otu417	Otu431	0.186002	0.0005	0.00515914
Otu309	Otu402	0.185763	1.66115e-07	2.75276e-06
Otu332	Otu407	0.185742	0.0002	0.00247021
Otu307	Otu329	0.185638	0.0055	0.031199
Otu375	Otu443	0.185416	0.0058	0.0323946
Otu324	Otu453	0.185308	0.0023	0.0164975
Otu412	Otu427	0.185107	0.0001	0.00138087
Otu352	Otu373	0.185015	0.0089	0.0437009
Otu398	Otu414	0.184977	1.66115e-07	2.75276e-06
Otu402	Otu441	0.184908	1.66115e-07	2.75276e-06
Otu352	Otu420	0.184783	0.0031	0.0206434
Otu335	Otu420	0.184653	0.0008	0.00739993
Otu350	Otu381	0.184518	0.0007	0.00669262
Otu342	Otu449	0.184499	0.0067	0.0358995
Otu342	Otu389	0.184486	0.0037	0.023522
Otu416	Otu431	0.184387	1.66115e-07	2.75276e-06
Otu310	Otu322	0.183888	0.006	0.0331983
Otu375	Otu420	0.183854	0.0052	0.030033
Otu362	Otu419	0.183722	0.005	0.0291908
Otu357	Otu407	0.183672	0.0002	0.00247021
Otu375	Otu412	0.182975	0.001	0.00878103
Otu389	Otu437	0.18297	0.0008	0.00739993
Otu345	Otu420	0.182917	0.0011	0.0094326
Otu311	Otu335	0.182848	0.0001	0.00138087
Otu388	Otu431	0.182526	1.66115e-07	2.75276e-06
Otu372	Otu449	0.18237	0.0035	0.0225616
Otu338	Otu342	0.182036	0.0078	0.0399135
Otu335	Otu426	0.181947	1.66115e-07	2.75276e-06
Otu413	Otu437	0.181894	0.0003	0.00343897
Otu358	Otu413	0.181754	1.66115e-07	2.75276e-06
Otu343	Otu375	0.181695	0.0048	0.0283645
Otu342	Otu345	0.181691	0.0023	0.0164975
Otu345	Otu402	0.181018	1.66115e-07	2.75276e-06
Otu416	Otu417	0.181006	0.0001	0.00138087
Otu412	Otu445	0.180984	0.0023	0.0164975
Otu338	Otu430	0.180801	0.0036	0.0230307
Otu307	Otu425	0.180694	0.0042	0.0257508
Otu389	Otu407	0.180627	0.0002	0.00247021
Otu444	Otu446	0.180433	0.0072	0.0377682
Otu318	Otu421	0.180356	1.66115e-07	2.75276e-06
Otu388	Otu433	0.180266	0.0003	0.00343897
Otu407	Otu417	0.180053	0.0005	0.00515914
Otu358	Otu431	0.179826	1.66115e-07	2.75276e-06
Otu318	Otu402	0.179669	1.66115e-07	2.75276e-06
Otu308	Otu427	0.179402	1.66115e-07	2.75276e-06
Otu305	Otu335	0.179386	0.0006	0.0059499
Otu405	Otu445	0.17933	0.0082	0.041314
Otu350	Otu401	0.17926	0.0007	0.00669262
Otu401	Otu438	0.179259	0.0027	0.0186129
Otu398	Otu416	0.179247	1.66115e-07	2.75276e-06
Otu398	Otu413	0.179199	1.66115e-07	2.75276e-06
Otu317	Otu401	0.179161	0.0012	0.0100882
Otu420	Otu425	0.179059	0.0032	0.0211307
Otu318	Otu453	0.178963	0.0002	0.00247021
Otu350	Otu414	0.178876	1.66115e-07	2.75276e-06
Otu401	Otu413	0.178799	1.66115e-07	2.75276e-06
Otu342	Otu381	0.178391	0.0105	0.0489981
Otu407	Otu431	0.178314	0.0001	0.00138087
Otu342	Otu385	0.178136	0.0062	0.0339653
Otu385	Otu424	0.177921	0.001	0.00878103
Otu380	Otu433	0.177796	0.0088	0.0433346
Otu381	Otu424	0.177786	0.0017	0.0130938
Otu323	Otu362	0.17763	0.0102	0.0479941
Otu324	Otu356	0.177629	0.0074	0.0384762
Otu308	Otu394	0.17735	1.66115e-07	2.75276e-06
Otu362	Otu425	0.177198	0.0048	0.0283645
Otu350	Otu402	0.177013	1.66115e-07	2.75276e-06
Otu413	Otu427	0.176868	0.0001	0.00138087
Otu357	Otu453	0.176743	0.0033	0.0216375
Otu394	Otu412	0.176281	1.66115e-07	2.75276e-06
Otu385	Otu412	0.176013	0.001	0.00878103
Otu336	Otu449	0.175856	0.0074	0.0384762
Otu311	Otu429	0.175654	1.66115e-07	2.75276e-06
Otu318	Otu398	0.175439	1.66115e-07	2.75276e-06
Otu309	Otu421	0.175372	1.66115e-07	2.75276e-06
Otu318	Otu338	0.17533	0.0001	0.00138087
Otu357	Otu424	0.175144	0.0046	0.0274824
Otu407	Otu416	0.175143	1.66115e-07	2.75276e-06
Otu402	Otu417	0.17483	0.0005	0.00515914
Otu309	Otu433	0.174744	1.66115e-07	2.75276e-06
Otu357	Otu413	0.174609	0.0002	0.00247021
Otu389	Otu421	0.174592	0.0004	0.00432614
Otu388	Otu412	0.174568	0.0001	0.00138087
Otu388	Otu450	0.174171	0.0003	0.00343897
Otu352	Otu401	0.173904	0.0021	0.0153809
Otu309	Otu418	0.173713	1.66115e-07	2.75276e-06
Otu318	Otu412	0.173414	1.66115e-07	2.75276e-06
Otu397	Otu429	0.173105	0.0012	0.0100882
Otu332	Otu449	0.173066	0.006	0.0331983
Otu358	Otu429	0.173029	1.66115e-07	2.75276e-06
Otu342	Otu420	0.172968	0.0098	0.0466892
Otu375	Otu416	0.172918	1.66115e-07	2.75276e-06
Otu358	Otu394	0.172723	1.66115e-07	2.75276e-06
Otu338	Otu380	0.172723	0.0079	0.0402662
Otu326	Otu411	0.17252	0.0075	0.0388109
Otu393	Otu427	0.172449	1.66115e-07	2.75276e-06
Otu313	Otu425	0.172296	0.0018	0.0136636
Otu330	Otu357	0.172239	0.0102	0.0479941
Otu389	Otu413	0.171856	1.66115e-07	2.75276e-06
Otu313	Otu363	0.17173	0.0072	0.0377682
Otu314	Otu416	0.171539	1.66115e-07	2.75276e-06
Otu318	Otu431	0.171524	1.66115e-07	2.75276e-06
Otu358	Otu402	0.17147	1.66115e-07	2.75276e-06
Otu330	Otu332	0.170826	0.0081	0.0409674
Otu448	Otu449	0.170806	0.0099	0.0470212
Otu391	Otu429	0.17069	0.0046	0.0274824
Otu388	Otu445	0.170675	0.0008	0.00739993
Otu343	Otu381	0.170651	0.0037	0.023522
Otu352	Otu446	0.170578	0.0065	0.0351424
Otu429	Otu450	0.170341	0.0063	0.0343605
Otu335	Otu427	0.170324	0.0003	0.00343897
Otu358	Otu405	0.169768	1.66115e-07	2.75276e-06
Otu394	Otu416	0.169574	1.66115e-07	2.75276e-06
Otu413	Otu417	0.169482	0.0009	0.00810166
Otu311	Otu402	0.169394	1.66115e-07	2.75276e-06
Otu324	Otu449	0.169316	0.008	0.0406141
Otu318	Otu335	0.169002	0.0001	0.00138087
Otu338	Otu412	0.168972	0.0013	0.010715
Otu360	Otu385	0.168888	0.007	0.0370379
Otu334	Otu433	0.168883	0.0038	0.0239599
Otu345	Otu352	0.168872	0.0014	0.0113268
Otu308	Otu421	0.168825	1.66115e-07	2.75276e-06
Otu365	Otu449	0.16881	0.0104	0.0486579
Otu418	Otu429	0.168793	0.0012	0.0100882
Otu314	Otu431	0.168699	1.66115e-07	2.75276e-06
Otu314	Otu357	0.168645	1.66115e-07	2.75276e-06
Otu412	Otu418	0.168546	0.0003	0.00343897
Otu317	Otu412	0.168468	0.0016	0.0125109
Otu424	Otu428	0.168401	0.0011	0.0094326
Otu304	Otu411	0.168294	0.0042	0.0257508
Otu330	Otu338	0.167872	0.0039	0.0244085
Otu445	Otu453	0.167838	0.0057	0.0319914
Otu415	Otu420	0.167765	0.0033	0.0216375
Otu330	Otu413	0.167718	0.0001	0.00138087
Otu373	Otu385	0.167671	0.0071	0.0374085
Otu418	Otu437	0.167448	0.0029	0.0196269
Otu335	Otu389	0.167392	0.0008	0.00739993
Otu414	Otu417	0.167392	0.0013	0.010715
Otu317	Otu413	0.167328	0.0005	0.00515914
Otu401	Otu402	0.167268	1.66115e-07	2.75276e-06
Otu414	Otu427	0.167209	0.0002	0.00247021
Otu412	Otu453	0.167178	0.0001	0.00138087
Otu353	Otu413	0.167172	0.0005	0.00515914
Otu335	Otu421	0.167099	1.66115e-07	2.75276e-06
Otu432	Otu450	0.166921	0.0056	0.0315894
Otu388	Otu402	0.166902	1.66115e-07	2.75276e-06
Otu385	Otu442	0.166856	0.0064	0.0347596
Otu314	Otu407	0.166832	1.66115e-07	2.75276e-06
Otu415	Otu433	0.166649	0.005	0.0291908
Otu335	Otu358	0.166512	0.0002	0.00247021
Otu413	Otu426	0.166388	0.0001	0.00138087
Otu407	Otu414	0.166328	0.0001	0.00138087
Otu394	Otu428	0.166265	0.0003	0.00343897
Otu427	Otu435	0.166253	1.66115e-07	2.75276e-06
Otu388	Otu411	0.166233	0.0004	0.00432614
Otu401	Otu412	0.166232	0.0008	0.00739993
Otu385	Otu401	0.166061	0.002	0.0148159
Otu340	Otu407	0.165921	0.0009	0.00810166
Otu304	Otu316	0.165756	0.0051	0.0295991
Otu322	Otu423	0.16567	0.0106	0.0493164
Otu350	Otu449	0.165544	0.0017	0.0130938
Otu309	Otu412	0.16551	0.0001	0.00138087
Otu416	Otu450	0.1655	1.66115e-07	2.75276e-06
Otu306	Otu435	0.165443	1.66115e-07	2.75276e-06
Otu416	Otu445	0.165302	0.0002	0.00247021
Otu373	Otu441	0.165188	0.0039	0.0244085
Otu343	Otu438	0.165089	0.0106	0.0493164
Otu413	Otu435	0.165024	1.66115e-07	2.75276e-06
Otu332	Otu358	0.164736	0.0003	0.00343897
Otu350	Otu389	0.164703	0.0009	0.00810166
Otu375	Otu424	0.164688	0.0066	0.0355236
Otu362	Otu449	0.164569	0.0046	0.0274824
Otu413	Otu429	0.164514	0.0001	0.00138087
Otu385	Otu413	0.164312	0.0002	0.00247021
Otu354	Otu420	0.164157	0.0085	0.0423255
Otu389	Otu433	0.164144	0.0039	0.0244085
Otu330	Otu388	0.164125	0.0009	0.00810166
Otu402	Otu450	0.163983	0.0002	0.00247021
Otu412	Otu433	0.163935	0.0022	0.0159467
Otu388	Otu401	0.163745	0.0004	0.00432614
Otu424	Otu450	0.163677	0.0056	0.0315894
Otu389	Otu449	0.163611	0.002	0.0148159
Otu381	Otu401	0.163567	0.0033	0.0216375
Otu406	Otu453	0.16349	0.0015	0.0119349
Otu343	Otu388	0.163408	0.0003	0.00343897
Otu322	Otu406	0.163395	0.0069	0.0366946
Otu373	Otu403	0.163349	0.0044	0.0266341
Otu397	Otu450	0.16323	0.0085	0.0423255
Otu359	Otu385	0.163201	0.0082	0.041314
Otu359	Otu414	0.163187	0.0028	0.0191182
Otu350	Otu431	0.163157	0.0001	0.00138087
Otu308	Otu384	0.163131	1.66115e-07	2.75276e-06
Otu345	Otu429	0.163007	0.001	0.00878103
Otu340	Otu345	0.163002	0.0034	0.0221203
Otu358	Otu417	0.16299	0.0023	0.0164975
Otu358	Otu438	0.162882	0.0015	0.0119349
Otu338	Otu431	0.16254	0.0002	0.00247021
Otu414	Otu431	0.162526	0.0001	0.00138087
Otu402	Otu407	0.162498	0.0001	0.00138087
Otu332	Otu350	0.162457	0.0039	0.0244085
Otu394	Otu413	0.162402	1.66115e-07	2.75276e-06
Otu314	Otu394	0.162401	1.66115e-07	2.75276e-06
Otu310	Otu426	0.16224	0.0023	0.0164975
Otu384	Otu416	0.162134	1.66115e-07	2.75276e-06
Otu320	Otu349	0.162097	0.0104	0.0486579
Otu412	Otu435	0.162074	1.66115e-07	2.75276e-06
Otu330	Otu431	0.162027	1.66115e-07	2.75276e-06
Otu330	Otu345	0.161975	0.0024	0.0170523
Otu398	Otu427	0.161928	0.0002	0.00247021
Otu404	Otu428	0.161873	0.0093	0.0450109
Otu401	Otu416	0.161723	0.0001	0.00138087
Otu357	Otu427	0.16165	0.0018	0.0136636
Otu310	Otu408	0.16165	0.0093	0.0450109
Otu353	Otu420	0.161604	0.0057	0.0319914
Otu401	Otu421	0.161537	0.0005	0.00515914
Otu345	Otu358	0.161402	0.0003	0.00343897
Otu358	Otu435	0.161292	0.0001	0.00138087
Otu330	Otu405	0.161291	0.0072	0.0377682
Otu388	Otu407	0.161284	1.66115e-07	2.75276e-06
Otu417	Otu449	0.161242	0.0087	0.0429765
Otu352	Otu432	0.161236	0.0031	0.0206434
Otu357	Otu388	0.160845	0.0017	0.0130938
Otu413	Otu433	0.160826	0.0005	0.00515914
Otu384	Otu426	0.160634	0.0045	0.0270333
Otu309	Otu424	0.160592	0.0004	0.00432614
Otu332	Otu388	0.160366	0.0013	0.010715
Otu317	Otu385	0.160363	0.0043	0.0261821
Otu353	Otu417	0.160336	0.0107	0.0496283
Otu393	Otu397	0.160319	0.001	0.00878103
Otu308	Otu317	0.160254	1.66115e-07	2.75276e-06
Otu431	Otu437	0.159747	0.0003	0.00343897
Otu407	Otu429	0.159718	0.0005	0.00515914
Otu335	Otu428	0.159674	0.0017	0.0130938
Otu345	Otu398	0.159671	0.0003	0.00343897
Otu340	Otu388	0.159643	0.0002	0.00247021
Otu388	Otu417	0.159551	0.0019	0.0142483
Otu326	Otu358	0.159481	0.0004	0.00432614
Otu393	Otu398	0.159417	0.0002	0.00247021
Otu389	Otu418	0.159286	0.0014	0.0113268
Otu309	Otu413	0.159182	1.66115e-07	2.75276e-06
Otu357	Otu431	0.159131	0.0011	0.0094326
Otu401	Otu450	0.158969	0.0051	0.0295991
Otu345	Otu393	0.158949	0.0006	0.0059499
Otu318	Otu389	0.158609	0.0001	0.00138087
Otu416	Otu418	0.158241	1.66115e-07	2.75276e-06
Otu402	Otu435	0.158222	1.66115e-07	2.75276e-06
Otu309	Otu352	0.158063	0.0012	0.0100882
Otu375	Otu431	0.158042	0.0015	0.0119349
Otu416	Otu438	0.157865	0.0003	0.00343897
Otu334	Otu427	0.157853	0.0002	0.00247021
Otu305	Otu345	0.157842	0.0025	0.0175798
Otu340	Otu428	0.157794	0.0102	0.0479941
Otu397	Otu433	0.157764	0.0054	0.0307972
Otu398	Otu450	0.157447	0.0005	0.00515914
Otu417	Otu429	0.157392	0.0055	0.031199
Otu335	Otu441	0.157315	0.0014	0.0113268
Otu330	Otu432	0.157205	0.0038	0.0239599
Otu385	Otu402	0.157052	1.66115e-07	2.75276e-06
Otu305	Otu310	0.156997	0.0099	0.0470212
Otu411	Otu418	0.156965	0.0069	0.0366946
Otu385	Otu447	0.156908	0.008	0.0406141
Otu357	Otu418	0.156868	0.0067	0.0358995
Otu427	Otu431	0.156741	1.66115e-07	2.75276e-06
Otu345	Otu397	0.156466	0.0017	0.0130938
Otu437	Otu453	0.156449	0.0028	0.0191182
Otu318	Otu435	0.156356	1.66115e-07	2.75276e-06
Otu425	Otu446	0.156256	0.0096	0.0459975
Otu308	Otu417	0.15624	1.66115e-07	2.75276e-06
Otu393	Otu406	0.156221	0.0017	0.0130938
Otu326	Otu432	0.156146	0.0035	0.0225616
Otu335	Otu394	0.156067	0.0001	0.00138087
Otu352	Otu412	0.156053	0.0038	0.0239599
Otu389	Otu417	0.156027	0.007	0.0370379
Otu330	Otu350	0.15596	0.0033	0.0216375
Otu393	Otu424	0.155824	0.0014	0.0113268
Otu370	Otu424	0.155612	0.0083	0.041664
Otu407	Otu449	0.155606	0.0014	0.0113268
Otu338	Otu393	0.15546	0.0031	0.0206434
Otu308	Otu407	0.155435	1.66115e-07	2.75276e-06
Otu412	Otu424	0.155168	0.0014	0.0113268
Otu340	Otu350	0.155108	0.0052	0.030033
Otu375	Otu385	0.155028	0.0106	0.0493164
Otu412	Otu421	0.154985	0.0004	0.00432614
Otu432	Otu439	0.154845	0.0027	0.0186129
Otu412	Otu446	0.154711	0.0024	0.0170523
Otu393	Otu438	0.154687	0.0095	0.0456723
Otu342	Otu388	0.154684	0.0022	0.0159467
Otu393	Otu413	0.154646	0.0004	0.00432614
Otu332	Otu389	0.154539	0.0068	0.0363118
Otu343	Otu446	0.154426	0.0045	0.0270333
Otu418	Otu420	0.154369	0.0029	0.0196269
Otu352	Otu407	0.154211	0.0021	0.0153809
Otu317	Otu415	0.154193	0.0069	0.0366946
Otu358	Otu414	0.154079	0.0001	0.00138087
Otu401	Otu433	0.153908	0.0059	0.0327992
Otu358	Otu389	0.15388	0.0003	0.00343897
Otu350	Otu432	0.153862	0.0013	0.010715
Otu357	Otu416	0.153769	0.0004	0.00432614
Otu402	Otu406	0.153758	0.0002	0.00247021
Otu345	Otu384	0.153602	0.0053	0.0303945
Otu358	Otu393	0.153549	0.0003	0.00343897
Otu321	Otu334	0.153436	0.0098	0.0466892
Otu308	Otu402	0.153421	1.66115e-07	2.75276e-06
Otu385	Otu449	0.153382	0.0045	0.0270333
Otu308	Otu418	0.153097	1.66115e-07	2.75276e-06
Otu309	Otu358	0.152778	0.0001	0.00138087
Otu309	Otu384	0.152739	0.0006	0.0059499
Otu318	Otu417	0.152154	0.0014	0.0113268
Otu401	Otu424	0.151904	0.0039	0.0244085
Otu385	Otu389	0.151854	0.0029	0.0196269
Otu309	Otu318	0.1518	1.66115e-07	2.75276e-06
Otu308	Otu431	0.151565	1.66115e-07	2.75276e-06
Otu304	Otu318	0.151532	0.0013	0.010715
Otu375	Otu401	0.151471	0.0095	0.0456723
Otu311	Otu381	0.151406	0.0019	0.0142483
Otu389	Otu428	0.151393	0.0045	0.0270333
Otu313	Otu453	0.151265	0.0031	0.0206434
Otu342	Otu393	0.150944	0.0085	0.0423255
Otu335	Otu417	0.15094	0.0068	0.0363118
Otu317	Otu416	0.150893	0.0001	0.00138087
Otu309	Otu401	0.150834	0.0003	0.00343897
Otu335	Otu384	0.150791	0.0082	0.041314
Otu345	Otu391	0.150736	0.0031	0.0206434
Otu350	Otu360	0.15068	0.0104	0.0486579
Otu338	Otu449	0.150661	0.0075	0.0388109
Otu397	Otu424	0.150613	0.0043	0.0261821
Otu407	Otu411	0.150538	0.0036	0.0230307
Otu332	Otu393	0.150362	0.0086	0.0426637
Otu407	Otu427	0.150194	0.0001	0.00138087
Otu312	Otu326	0.150171	0.0017	0.0130938
Otu335	Otu418	0.150163	0.0026	0.0181064
Otu393	Otu429	0.150089	0.0025	0.0175798
Otu342	Otu413	0.149951	0.0032	0.0211307
Otu402	Otu416	0.149841	1.66115e-07	2.75276e-06
Otu389	Otu393	0.149778	0.0014	0.0113268
Otu340	Otu426	0.149737	0.0081	0.0409674
Otu314	Otu388	0.149713	1.66115e-07	2.75276e-06
Otu309	Otu394	0.149342	1.66115e-07	2.75276e-06
Otu431	Otu443	0.149318	0.001	0.00878103
Otu309	Otu317	0.149309	0.0008	0.00739993
Otu308	Otu401	0.149292	1.66115e-07	2.75276e-06
Otu407	Otu413	0.149187	0.0001	0.00138087
Otu304	Otu338	0.149117	0.0045	0.0270333
Otu401	Otu429	0.149072	0.0039	0.0244085
Otu384	Otu402	0.14907	0.0007	0.00669262
Otu345	Otu445	0.149024	0.009	0.0440399
Otu416	Otu420	0.148965	0.0003	0.00343897
Otu381	Otu412	0.148897	0.0041	0.0253075
Otu318	Otu414	0.148794	1.66115e-07	2.75276e-06
Otu335	Otu398	0.148752	0.0003	0.00343897
Otu412	Otu426	0.148739	0.0015	0.0119349
Otu389	Otu406	0.148703	0.0038	0.0239599
Otu398	Otu425	0.14864	0.0005	0.00515914
Otu388	Otu398	0.148423	1.66115e-07	2.75276e-06
Otu388	Otu441	0.148376	0.0002	0.00247021
Otu350	Otu352	0.148348	0.0058	0.0323946
Otu309	Otu398	0.148246	1.66115e-07	2.75276e-06
Otu350	Otu398	0.148214	0.0001	0.00138087
Otu340	Otu431	0.148091	0.0009	0.00810166
Otu373	Otu414	0.14799	0.0058	0.0323946
Otu393	Otu415	0.147913	0.003	0.020132
Otu308	Otu340	0.1479	1.66115e-07	2.75276e-06
Otu381	Otu385	0.147843	0.0083	0.041664
Otu394	Otu431	0.147746	1.66115e-07	2.75276e-06
Otu314	Otu401	0.147704	1.66115e-07	2.75276e-06
Otu345	Otu388	0.147576	0.0008	0.00739993
Otu431	Otu438	0.147533	0.0022	0.0159467
Otu412	Otu438	0.147516	0.0087	0.0429765
Otu402	Otu443	0.147442	0.0006	0.0059499
Otu318	Otu428	0.147437	0.0011	0.0094326
Otu340	Otu416	0.147058	0.0001	0.00138087
Otu340	Otu413	0.146954	0.0017	0.0130938
Otu425	Otu435	0.146953	0.0004	0.00432614
Otu317	Otu318	0.146711	0.0011	0.0094326
Otu398	Otu435	0.146589	1.66115e-07	2.75276e-06
Otu311	Otu394	0.146498	0.0003	0.00343897
Otu326	Otu394	0.146176	0.0006	0.0059499
Otu413	Otu443	0.146141	0.0022	0.0159467
Otu309	Otu435	0.146055	0.0001	0.00138087
Otu385	Otu421	0.145783	0.0009	0.00810166
Otu393	Otu446	0.14548	0.0043	0.0261821
Otu389	Otu414	0.14533	0.0013	0.010715
Otu397	Otu423	0.145232	0.0085	0.0423255
Otu412	Otu423	0.145214	0.0042	0.0257508
Otu304	Otu317	0.14497	0.01	0.0473665
Otu350	Otu397	0.144955	0.0034	0.0221203
Otu345	Otu414	0.144931	0.0014	0.0113268
Otu345	Otu370	0.144913	0.0096	0.0459975
Otu350	Otu413	0.144912	0.0005	0.00515914
Otu381	Otu406	0.144636	0.0063	0.0343605
Otu393	Otu416	0.1446	1.66115e-07	2.75276e-06
Otu373	Otu431	0.144534	0.002	0.0148159
Otu314	Otu340	0.144421	1.66115e-07	2.75276e-06
Otu317	Otu389	0.144407	0.0064	0.0347596
Otu381	Otu431	0.144363	0.0008	0.00739993
Otu309	Otu414	0.144357	0.0003	0.00343897
Otu318	Otu394	0.14428	1.66115e-07	2.75276e-06
Otu349	Otu358	0.144276	0.0015	0.0119349
Otu421	Otu438	0.144261	0.0039	0.0244085
Otu345	Otu449	0.144233	0.0039	0.0244085
Otu357	Otu441	0.144215	0.0085	0.0423255
Otu441	Otu446	0.144132	0.0051	0.0295991
Otu388	Otu418	0.144112	0.001	0.00878103
Otu335	Otu416	0.144042	0.0001	0.00138087
Otu350	Otu384	0.143843	0.0089	0.0437009
Otu394	Otu407	0.143479	1.66115e-07	2.75276e-06
Otu311	Otu318	0.143109	0.0002	0.00247021
Otu431	Otu441	0.143077	0.0004	0.00432614
Otu309	Otu416	0.143002	1.66115e-07	2.75276e-06
Otu334	Otu358	0.142937	0.0009	0.00810166
Otu424	Otu435	0.142832	0.0003	0.00343897
Otu318	Otu385	0.142829	0.0007	0.00669262
Otu311	Otu334	0.142446	0.0011	0.0094326
Otu413	Otu441	0.142367	0.0005	0.00515914
Otu335	Otu338	0.142354	0.0054	0.0307972
Otu322	Otu403	0.142233	0.0102	0.0479941
Otu335	Otu433	0.142214	0.0082	0.041314
Otu394	Otu435	0.142211	1.66115e-07	2.75276e-06
Otu406	Otu431	0.142095	0.001	0.00878103
Otu398	Otu418	0.141916	0.0004	0.00432614
Otu385	Otu407	0.141777	0.0023	0.0164975
Otu359	Otu416	0.141263	0.0003	0.00343897
Otu312	Otu397	0.141214	0.001	0.00878103
Otu314	Otu427	0.141146	1.66115e-07	2.75276e-06
Otu314	Otu414	0.141036	1.66115e-07	2.75276e-06
Otu428	Otu441	0.140943	0.0029	0.0196269
Otu389	Otu402	0.140935	0.0004	0.00432614
Otu416	Otu426	0.140783	0.0001	0.00138087
Otu345	Otu432	0.140755	0.0031	0.0206434
Otu402	Otu414	0.140742	1.66115e-07	2.75276e-06
Otu358	Otu437	0.140679	0.0017	0.0130938
Otu311	Otu431	0.140668	0.0005	0.00515914
Otu308	Otu426	0.14055	0.0001	0.00138087
Otu308	Otu420	0.140514	0.0001	0.00138087
Otu350	Otu416	0.140512	0.0002	0.00247021
Otu345	Otu421	0.140419	0.001	0.00878103
Otu330	Otu393	0.140279	0.0061	0.0335485
Otu308	Otu416	0.140224	1.66115e-07	2.75276e-06
Otu402	Otu438	0.140189	0.0019	0.0142483
Otu304	Otu309	0.139896	0.0005	0.00515914
Otu312	Otu348	0.139648	0.0017	0.0130938
Otu311	Otu437	0.139628	0.0032	0.0211307
Otu308	Otu414	0.139612	1.66115e-07	2.75276e-06
Otu318	Otu403	0.139473	0.0003	0.00343897
Otu318	Otu420	0.139461	0.0028	0.0191182
Otu426	Otu441	0.139409	0.0025	0.0175798
Otu335	Otu345	0.139393	0.0023	0.0164975
Otu359	Otu388	0.139371	0.0043	0.0261821
Otu332	Otu412	0.139336	0.0104	0.0486579
Otu312	Otu314	0.139311	1.66115e-07	2.75276e-06
Otu312	Otu321	0.139117	0.0031	0.0206434
Otu397	Otu449	0.139008	0.0094	0.0453534
Otu412	Otu428	0.138833	0.0038	0.0239599
Otu360	Otu388	0.138729	0.0061	0.0335485
Otu318	Otu393	0.138695	0.0007	0.00669262
Otu312	Otu358	0.138614	0.0002	0.00247021
Otu350	Otu412	0.13861	0.0029	0.0196269
Otu345	Otu379	0.138531	0.0091	0.0443638
Otu314	Otu418	0.138491	1.66115e-07	2.75276e-06
Otu385	Otu427	0.138449	0.0038	0.0239599
Otu308	Otu385	0.138422	1.66115e-07	2.75276e-06
Otu318	Otu332	0.138359	0.0029	0.0196269
Otu318	Otu407	0.138355	0.0005	0.00515914
Otu318	Otu358	0.138263	0.0003	0.00343897
Otu334	Otu431	0.138182	0.001	0.00878103
Otu358	Otu398	0.138091	0.0003	0.00343897
Otu312	Otu435	0.1379	0.0001	0.00138087
Otu403	Otu426	0.137847	0.0031	0.0206434
Otu394	Otu426	0.137835	0.0003	0.00343897
Otu358	Otu426	0.137814	0.0008	0.00739993
Otu318	Otu433	0.13774	0.0032	0.0211307
Otu345	Otu395	0.137532	0.0094	0.0453534
Otu335	Otu388	0.137494	0.001	0.00878103
Otu402	Otu421	0.137468	0.0006	0.0059499
Otu373	Otu388	0.13728	0.0056	0.0315894
Otu357	Otu414	0.137259	0.0076	0.03917
Otu314	Otu402	0.137174	1.66115e-07	2.75276e-06
Otu358	Otu421	0.136957	0.0004	0.00432614
Otu309	Otu314	0.136898	1.66115e-07	2.75276e-06
Otu317	Otu345	0.136749	0.009	0.0440399
Otu335	Otu431	0.136726	0.0008	0.00739993
Otu353	Otu388	0.136551	0.0027	0.0186129
Otu353	Otu403	0.136527	0.0107	0.0496283
Otu412	Otu443	0.136502	0.008	0.0406141
Otu343	Otu385	0.136271	0.009	0.0440399
Otu388	Otu446	0.136144	0.0028	0.0191182
Otu427	Otu438	0.136097	0.0091	0.0443638
Otu332	Otu414	0.136073	0.0072	0.0377682
Otu318	Otu427	0.13591	0.0009	0.00810166
Otu414	Otu418	0.135883	0.0028	0.0191182
Otu420	Otu431	0.135755	0.0031	0.0206434
Otu428	Otu431	0.135607	0.0015	0.0119349
Otu388	Otu403	0.135429	0.0008	0.00739993
Otu427	Otu430	0.135161	0.0036	0.0230307
Otu350	Otu441	0.135153	0.0016	0.0125109
Otu413	Otu453	0.134781	0.0021	0.0153809
Otu335	Otu429	0.134758	0.005	0.0291908
Otu427	Otu441	0.134673	0.0017	0.0130938
Otu385	Otu418	0.13465	0.0067	0.0358995
Otu350	Otu385	0.134618	0.0053	0.0303945
Otu304	Otu439	0.134489	0.0094	0.0453534
Otu358	Otu450	0.134367	0.0034	0.0221203
Otu358	Otu420	0.134306	0.0037	0.023522
Otu345	Otu418	0.134133	0.0034	0.0221203
Otu326	Otu388	0.134047	0.0036	0.0230307
Otu393	Otu412	0.133993	0.0031	0.0206434
Otu338	Otu424	0.133952	0.0104	0.0486579
Otu431	Otu450	0.133928	0.0051	0.0295991
Otu357	Otu358	0.133919	0.0041	0.0253075
Otu355	Otu413	0.133883	0.0043	0.0261821
Otu371	Otu388	0.133676	0.0099	0.0470212
Otu309	Otu450	0.133425	0.0034	0.0221203
Otu307	Otu407	0.133282	0.0065	0.0351424
Otu318	Otu425	0.133073	0.0022	0.0159467
Otu373	Otu407	0.132773	0.0095	0.0456723
Otu335	Otu402	0.132694	0.001	0.00878103
Otu421	Otu433	0.132618	0.0059	0.0327992
Otu352	Otu421	0.132171	0.0045	0.0270333
Otu318	Otu384	0.131746	0.0045	0.0270333
Otu305	Otu309	0.13134	0.0025	0.0175798
Otu307	Otu309	0.131266	0.0036	0.0230307
Otu401	Otu426	0.131263	0.0059	0.0327992
Otu394	Otu421	0.131205	0.0001	0.00138087
Otu402	Otu424	0.131189	0.0014	0.0113268
Otu311	Otu384	0.130984	0.0086	0.0426637
Otu308	Otu398	0.130967	1.66115e-07	2.75276e-06
Otu398	Otu443	0.130936	0.0032	0.0211307
Otu314	Otu350	0.130855	1.66115e-07	2.75276e-06
Otu389	Otu394	0.130841	0.0009	0.00810166
Otu304	Otu401	0.13057	0.0072	0.0377682
Otu381	Otu441	0.130556	0.0093	0.0450109
Otu318	Otu381	0.130502	0.0043	0.0261821
Otu360	Otu413	0.130458	0.0075	0.0388109
Otu358	Otu415	0.130389	0.0035	0.0225616
Otu426	Otu427	0.130387	0.0027	0.0186129
Otu314	Otu433	0.130323	0.0005	0.00515914
Otu418	Otu428	0.130323	0.0104	0.0486579
Otu431	Otu435	0.130297	0.0003	0.00343897
Otu326	Otu412	0.130271	0.008	0.0406141
Otu338	Otu345	0.129956	0.0094	0.0453534
Otu384	Otu431	0.129907	0.0045	0.0270333
Otu357	Otu394	0.12948	0.0049	0.0287612
Otu416	Otu441	0.129464	0.0001	0.00138087
Otu365	Otu388	0.129201	0.0092	0.0446875
Otu353	Otu407	0.129082	0.0061	0.0335485
Otu308	Otu450	0.129004	0.0003	0.00343897
Otu394	Otu418	0.128886	0.0012	0.0100882
Otu311	Otu421	0.128861	0.0009	0.00810166
Otu311	Otu441	0.128772	0.0018	0.0136636
Otu394	Otu403	0.12876	0.0004	0.00432614
Otu397	Otu401	0.128739	0.0101	0.0476792
Otu350	Otu388	0.128706	0.0021	0.0153809
Otu305	Otu413	0.128595	0.0047	0.0279267
Otu314	Otu420	0.128492	0.0001	0.00138087
Otu431	Otu453	0.128437	0.0013	0.010715
Otu406	Otu412	0.128428	0.0066	0.0355236
Otu350	Otu427	0.128311	0.0029	0.0196269
Otu308	Otu443	0.128266	0.0003	0.00343897
Otu385	Otu441	0.128104	0.0059	0.0327992
Otu421	Otu443	0.128081	0.0058	0.0323946
Otu388	Otu406	0.127717	0.003	0.020132
Otu406	Otu427	0.127672	0.0048	0.0283645
Otu403	Otu453	0.127491	0.0067	0.0358995
Otu385	Otu416	0.127463	0.0009	0.00810166
Otu388	Otu435	0.127412	0.0003	0.00343897
Otu311	Otu427	0.127262	0.0017	0.0130938
Otu398	Otu401	0.127075	0.0016	0.0125109
Otu414	Otu429	0.127062	0.005	0.0291908
Otu309	Otu388	0.12682	0.0009	0.00810166
Otu385	Otu431	0.126639	0.0032	0.0211307
Otu345	Otu427	0.126542	0.0028	0.0191182
Otu305	Otu407	0.126507	0.0073	0.038115
Otu316	Otu416	0.126503	0.0015	0.0119349
Otu412	Otu429	0.126491	0.009	0.0440399
Otu431	Otu433	0.126469	0.004	0.0248747
Otu421	Otu432	0.12636	0.002	0.0148159
Otu313	Otu318	0.126305	0.0037	0.023522
Otu413	Otu421	0.126229	0.0012	0.0100882
Otu340	Otu398	0.126116	0.0044	0.0266341
Otu314	Otu421	0.126051	0.0001	0.00138087
Otu398	Otu406	0.126036	0.0019	0.0142483
Otu314	Otu450	0.125961	1.66115e-07	2.75276e-06
Otu401	Otu427	0.125958	0.0062	0.0339653
Otu384	Otu398	0.125708	0.0051	0.0295991
Otu389	Otu401	0.125707	0.0098	0.0466892
Otu343	Otu431	0.125698	0.0025	0.0175798
Otu402	Otu427	0.125306	0.0012	0.0100882
Otu350	Otu453	0.12524	0.0091	0.0443638
Otu358	Otu441	0.125155	0.002	0.0148159
Otu318	Otu350	0.125126	0.0017	0.0130938
Otu381	Otu388	0.125091	0.006	0.0331983
Otu375	Otu388	0.125049	0.008	0.0406141
Otu402	Otu426	0.12487	0.001	0.00878103
Otu304	Otu431	0.12485	0.0034	0.0221203
Otu432	Otu441	0.124779	0.006	0.0331983
Otu343	Otu416	0.12474	0.0007	0.00669262
Otu312	Otu424	0.124707	0.004	0.0248747
Otu407	Otu428	0.12461	0.0057	0.0319914
Otu402	Otu420	0.124336	0.0026	0.0181064
Otu424	Otu427	0.124308	0.0056	0.0315894
Otu309	Otu438	0.124237	0.0077	0.0395659
Otu375	Otu413	0.124199	0.0097	0.0463465
Otu309	Otu437	0.124111	0.0036	0.0230307
Otu308	Otu389	0.123863	0.0004	0.00432614
Otu345	Otu385	0.123844	0.009	0.0440399
Otu335	Otu414	0.123812	0.0039	0.0244085
Otu403	Otu439	0.123786	0.0095	0.0456723
Otu314	Otu426	0.123738	0.0001	0.00138087
Otu393	Otu431	0.123557	0.0016	0.0125109
Otu398	Otu429	0.123512	0.003	0.020132
Otu358	Otu384	0.123467	0.0054	0.0307972
Otu330	Otu358	0.123466	0.006	0.0331983
Otu309	Otu359	0.123085	0.0071	0.0374085
Otu309	Otu431	0.123006	0.0007	0.00669262
Otu411	Otu416	0.122984	0.0025	0.0175798
Otu406	Otu421	0.122949	0.0041	0.0253075
Otu385	Otu393	0.122827	0.0084	0.041991
Otu397	Otu421	0.122756	0.0041	0.0253075
Otu318	Otu424	0.122523	0.0041	0.0253075
Otu318	Otu437	0.122414	0.0055	0.031199
Otu334	Otu407	0.122175	0.0057	0.0319914
Otu309	Otu312	0.122087	0.0009	0.00810166
Otu308	Otu428	0.122072	0.0006	0.0059499
Otu412	Otu441	0.121926	0.0048	0.0283645
Otu314	Otu425	0.12187	0.0003	0.00343897
Otu407	Otu424	0.121654	0.0065	0.0351424
Otu317	Otu402	0.121603	0.0038	0.0239599
Otu318	Otu388	0.121138	0.0013	0.010715
Otu334	Otu421	0.120953	0.0061	0.0335485
Otu311	Otu358	0.120927	0.0014	0.0113268
Otu416	Otu425	0.120841	0.0014	0.0113268
Otu332	Otu416	0.120681	0.0017	0.0130938
Otu402	Otu445	0.120674	0.0076	0.03917
Otu318	Otu340	0.120417	0.009	0.0440399
Otu381	Otu421	0.120362	0.0079	0.0402662
Otu406	Otu416	0.120246	0.0011	0.0094326
Otu310	Otu388	0.120052	0.0075	0.0388109
Otu412	Otu432	0.120006	0.0094	0.0453534
Otu416	Otu429	0.119779	0.0013	0.010715
Otu312	Otu403	0.119769	0.0025	0.0175798
Otu316	Otu394	0.119697	0.0071	0.0374085
Otu314	Otu384	0.119663	0.0004	0.00432614
Otu334	Otu394	0.119383	0.0025	0.0175798
Otu334	Otu441	0.119378	0.0089	0.0437009
Otu427	Otu432	0.118974	0.0064	0.0347596
Otu312	Otu388	0.118948	0.0014	0.0113268
Otu398	Otu426	0.118925	0.0034	0.0221203
Otu388	Otu389	0.118903	0.0067	0.0358995
Otu340	Otu358	0.118843	0.0054	0.0307972
Otu358	Otu427	0.118665	0.0022	0.0159467
Otu401	Otu435	0.118512	0.002	0.0148159
Otu418	Otu435	0.118484	0.0018	0.0136636
Otu311	Otu401	0.118281	0.005	0.0291908
Otu416	Otu433	0.117828	0.0021	0.0153809
Otu362	Otu388	0.117776	0.0058	0.0323946
Otu334	Otu416	0.117657	0.0017	0.0130938
Otu413	Otu449	0.11765	0.0067	0.0358995
Otu330	Otu402	0.117614	0.0045	0.0270333
Otu402	Otu418	0.11756	0.0023	0.0164975
Otu352	Otu402	0.117554	0.0049	0.0287612
Otu311	Otu413	0.117539	0.0023	0.0164975
Otu381	Otu402	0.117504	0.0035	0.0225616
Otu332	Otu413	0.11748	0.0104	0.0486579
Otu308	Otu433	0.117191	0.0007	0.00669262
Otu398	Otu446	0.117159	0.0054	0.0307972
Otu305	Otu431	0.116601	0.0063	0.0343605
Otu309	Otu316	0.116511	0.0078	0.0399135
Otu394	Otu453	0.116249	0.0026	0.0181064
Otu388	Otu391	0.116207	0.0093	0.0450109
Otu345	Otu426	0.11599	0.0088	0.0433346
Otu322	Otu402	0.115956	0.0074	0.0384762
Otu312	Otu401	0.115831	0.0054	0.0307972
Otu318	Otu426	0.115524	0.0035	0.0225616
Otu312	Otu334	0.115339	0.0081	0.0409674
Otu398	Otu417	0.115191	0.0099	0.0470212
Otu314	Otu438	0.115179	0.0009	0.00810166
Otu358	Otu407	0.114951	0.0026	0.0181064
Otu314	Otu348	0.114854	0.0007	0.00669262
Otu373	Otu402	0.114816	0.0096	0.0459975
Otu394	Otu439	0.114777	0.0059	0.0327992
Otu416	Otu421	0.114558	0.0007	0.00669262
Otu429	Otu435	0.114445	0.0023	0.0164975
Otu398	Otu407	0.114361	0.0016	0.0125109
Otu314	Otu335	0.114276	0.0008	0.00739993
Otu416	Otu428	0.114148	0.0032	0.0211307
Otu394	Otu398	0.11386	0.0009	0.00810166
Otu311	Otu406	0.113631	0.01	0.0473665
Otu308	Otu388	0.113623	0.0005	0.00515914
Otu431	Otu449	0.113286	0.0063	0.0343605
Otu402	Otu437	0.113277	0.0048	0.0283645
Otu386	Otu394	0.113055	0.0095	0.0456723
Otu394	Otu401	0.113048	0.0046	0.0274824
Otu305	Otu421	0.113045	0.0102	0.0479941
Otu394	Otu443	0.112937	0.0065	0.0351424
Otu314	Otu389	0.112895	0.0005	0.00515914
Otu309	Otu420	0.112778	0.0087	0.0429765
Otu314	Otu317	0.112664	0.0009	0.00810166
Otu314	Otu393	0.112552	0.0001	0.00138087
Otu310	Otu318	0.11228	0.0101	0.0476792
Otu406	Otu407	0.112255	0.0082	0.041314
Otu389	Otu416	0.111962	0.0021	0.0153809
Otu416	Otu446	0.111917	0.0031	0.0206434
Otu405	Otu431	0.111486	0.0101	0.0476792
Otu357	Otu402	0.111469	0.0101	0.0476792
Otu402	Otu429	0.111408	0.0034	0.0221203
Otu402	Otu433	0.111375	0.0084	0.041991
Otu350	Otu407	0.111155	0.0059	0.0327992
Otu385	Otu398	0.111145	0.0057	0.0319914
Otu358	Otu428	0.111113	0.0074	0.0384762
Otu414	Otu421	0.110931	0.0046	0.0274824
Otu394	Otu433	0.110793	0.0094	0.0453534
Otu308	Otu393	0.11054	0.0006	0.0059499
Otu394	Otu402	0.110473	0.0013	0.010715
Otu307	Otu402	0.110431	0.0076	0.03917
Otu353	Otu431	0.110287	0.0105	0.0489981
Otu318	Otu406	0.110163	0.0092	0.0446875
Otu358	Otu401	0.110094	0.0093	0.0450109
Otu326	Otu416	0.109834	0.0036	0.0230307
Otu314	Otu453	0.109546	0.0005	0.00515914
Otu403	Otu407	0.109526	0.007	0.0370379
Otu403	Otu413	0.109486	0.006	0.0331983
Otu314	Otu318	0.109432	0.0003	0.00343897
Otu402	Otu447	0.109366	0.0092	0.0446875
Otu308	Otu316	0.109188	0.0024	0.0170523
Otu307	Otu435	0.108897	0.0058	0.0323946
Otu318	Otu429	0.108824	0.009	0.0440399
Otu401	Otu431	0.108662	0.0064	0.0347596
Otu311	Otu398	0.108584	0.0027	0.0186129
Otu311	Otu397	0.108511	0.0106	0.0493164
Otu416	Otu437	0.108389	0.0042	0.0257508
Otu397	Otu435	0.108162	0.004	0.0248747
Otu350	Otu435	0.107827	0.0031	0.0206434
Otu308	Otu312	0.10774	0.0003	0.00343897
Otu314	Otu381	0.1077	0.0011	0.0094326
Otu309	Otu439	0.107579	0.0103	0.0483491
Otu394	Otu427	0.107539	0.0029	0.0196269
Otu402	Otu403	0.107421	0.0029	0.0196269
Otu353	Otu402	0.107192	0.0087	0.0429765
Otu308	Otu359	0.106994	0.0026	0.0181064
Otu397	Otu431	0.106784	0.0087	0.0429765
Otu388	Otu394	0.106426	0.002	0.0148159
Otu308	Otu326	0.106185	0.0012	0.0100882
Otu308	Otu429	0.106114	0.0012	0.0100882
Otu426	Otu431	0.106048	0.0085	0.0423255
Otu350	Otu358	0.105515	0.0072	0.0377682
Otu388	Otu424	0.105313	0.0098	0.0466892
Otu309	Otu397	0.104477	0.0093	0.0450109
Otu398	Otu403	0.104329	0.005	0.0291908
Otu413	Otu418	0.10403	0.0101	0.0476792
Otu314	Otu429	0.103916	0.001	0.00878103
Otu308	Otu345	0.10361	0.0023	0.0164975
Otu309	Otu350	0.103386	0.0064	0.0347596
Otu314	Otu326	0.103114	0.0011	0.0094326
Otu397	Otu416	0.102518	0.0036	0.0230307
Otu416	Otu453	0.10251	0.0042	0.0257508
Otu431	Otu432	0.102138	0.01	0.0473665
Otu384	Otu435	0.101878	0.0087	0.0429765
Otu314	Otu423	0.101844	0.0015	0.0119349
Otu381	Otu416	0.101416	0.0056	0.0315894
Otu414	Otu435	0.101251	0.0035	0.0225616
Otu330	Otu416	0.100341	0.0072	0.0377682
Otu314	Otu443	0.10028	0.0015	0.0119349
Otu421	Otu441	0.100279	0.0093	0.0450109
Otu314	Otu403	0.100128	0.0017	0.0130938
Otu345	Otu394	0.099987	0.0064	0.0347596
Otu314	Otu406	0.099923	0.0014	0.0113268
Otu308	Otu352	0.099545	0.004	0.0248747
Otu355	Otu416	0.099281	0.0098	0.0466892
Otu308	Otu357	0.09904	0.0049	0.0287612
Otu304	Otu314	0.098721	0.0017	0.0130938
Otu393	Otu402	0.098183	0.0081	0.0409674
Otu308	Otu335	0.09743	0.0028	0.0191182
Otu398	Otu421	0.097378	0.0046	0.0274824
Otu314	Otu441	0.097305	0.0015	0.0119349
Otu311	Otu388	0.097165	0.0069	0.0366946
Otu393	Otu435	0.097082	0.0057	0.0319914
Otu402	Otu428	0.097069	0.0101	0.0476792
Otu314	Otu375	0.096432	0.003	0.020132
Otu308	Otu403	0.096028	0.0026	0.0181064
Otu421	Otu431	0.095867	0.0056	0.0315894
Otu416	Otu443	0.09514	0.0104	0.0486579
Otu432	Otu435	0.094416	0.0075	0.0388109
Otu312	Otu413	0.094074	0.0107	0.0496283
Otu338	Otu416	0.093791	0.01	0.0473665
Otu311	Otu435	0.093578	0.0056	0.0315894
Otu308	Otu334	0.09337	0.004	0.0248747
Otu308	Otu353	0.093067	0.0056	0.0315894
Otu312	Otu394	0.092463	0.0076	0.03917
Otu313	Otu416	0.092049	0.0092	0.0446875
Otu308	Otu445	0.091963	0.0088	0.0433346
Otu305	Otu314	0.091878	0.0045	0.0270333
Otu416	Otu424	0.091861	0.0088	0.0433346
Otu314	Otu353	0.091137	0.0043	0.0261821
Otu421	Otu435	0.090685	0.0047	0.0279267
Otu314	Otu439	0.089452	0.0045	0.0270333
Otu308	Otu311	0.088565	0.004	0.0248747
Otu313	Otu314	0.087085	0.0054	0.0307972
Otu314	Otu437	0.086859	0.0052	0.030033
Otu308	Otu338	0.086037	0.0087	0.0429765
Otu314	Otu397	0.085542	0.0057	0.0319914
Otu308	Otu310	0.085507	0.0076	0.03917
Otu314	Otu343	0.083911	0.007	0.0370379
Otu308	Otu441	0.083827	0.0067	0.0358995
Otu308	Otu424	0.083341	0.0084	0.041991
Otu308	Otu404	-0.072481	0.0096	0.0459975
Otu314	Otu336	-0.074515	0.0081	0.0409674
Otu314	Otu351	-0.074709	0.0096	0.0459975
Otu314	Otu442	-0.074929	0.0078	0.0399135
Otu314	Otu399	-0.075178	0.0071	0.0374085
Otu314	Otu396	-0.076514	0.009	0.0440399
Otu314	Otu444	-0.078667	0.0045	0.0270333
Otu308	Otu399	-0.080466	0.0072	0.0377682
Otu314	Otu451	-0.082124	0.0054	0.0307972
Otu314	Otu367	-0.082919	0.0052	0.030033
Otu308	Otu382	-0.083898	0.0075	0.0388109
Otu308	Otu368	-0.088575	0.0041	0.0253075
Otu314	Otu419	-0.088608	0.0018	0.0136636
Otu368	Otu416	-0.090028	0.0078	0.0399135
Otu308	Otu436	-0.091195	0.0061	0.0335485
Otu328	Otu416	-0.094302	0.007	0.0370379
Otu308	Otu337	-0.094511	0.0028	0.0191182
Otu337	Otu435	-0.094948	0.0096	0.0459975
Otu314	Otu400	-0.095852	0.0008	0.00739993
Otu339	Otu435	-0.096838	0.0047	0.0279267
Otu308	Otu351	-0.09805	0.0023	0.0164975
Otu341	Otu435	-0.099865	0.0057	0.0319914
Otu390	Otu416	-0.101121	0.0045	0.0270333
Otu308	Otu390	-0.101681	0.0019	0.0142483
Otu308	Otu331	-0.102598	0.0014	0.0113268
Otu314	Otu361	-0.103164	0.0008	0.00739993
Otu396	Otu416	-0.103308	0.0051	0.0295991
Otu394	Otu444	-0.105096	0.0059	0.0327992
Otu371	Otu435	-0.1079	0.0065	0.0351424
Otu377	Otu435	-0.108046	0.0033	0.0216375
Otu400	Otu427	-0.108294	0.0107	0.0496283
Otu314	Otu333	-0.109431	0.001	0.00878103
Otu315	Otu402	-0.110127	0.0092	0.0446875
Otu366	Otu416	-0.110347	0.0042	0.0257508
Otu309	Otu337	-0.111056	0.0067	0.0358995
Otu354	Otu394	-0.111149	0.0077	0.0395659
Otu367	Otu402	-0.11121	0.0076	0.03917
Otu314	Otu337	-0.111342	0.0004	0.00432614
Otu308	Otu328	-0.111552	0.0004	0.00432614
Otu364	Otu431	-0.112928	0.01	0.0473665
Otu394	Otu396	-0.113773	0.0074	0.0384762
Otu368	Otu413	-0.114707	0.0083	0.041664
Otu374	Otu431	-0.114919	0.0101	0.0476792
Otu435	Otu451	-0.115074	0.0038	0.0239599
Otu308	Otu315	-0.115933	0.0006	0.0059499
Otu416	Otu440	-0.11695	0.002	0.0148159
Otu312	Otu325	-0.117041	0.0103	0.0483491
Otu382	Otu435	-0.117119	0.0021	0.0153809
Otu378	Otu398	-0.118038	0.0103	0.0483491
Otu413	Otu419	-0.118073	0.0074	0.0384762
Otu394	Otu436	-0.118551	0.0061	0.0335485
Otu308	Otu367	-0.118697	0.0004	0.00432614
Otu309	Otu390	-0.120213	0.005	0.0291908
Otu398	Otu440	-0.120449	0.0045	0.0270333
Otu309	Otu347	-0.121093	0.0054	0.0307972
Otu333	Otu398	-0.121144	0.0099	0.0470212
Otu314	Otu328	-0.122461	0.0002	0.00247021
Otu314	Otu436	-0.123192	0.0001	0.00138087
Otu333	Otu431	-0.12335	0.01	0.0473665
Otu364	Otu398	-0.124516	0.0055	0.031199
Otu308	Otu396	-0.124614	0.0004	0.00432614
Otu390	Otu435	-0.126438	0.0008	0.00739993
Otu368	Otu388	-0.126644	0.0059	0.0327992
Otu344	Otu358	-0.126834	0.0096	0.0459975
Otu367	Otu413	-0.127117	0.0072	0.0377682
Otu318	Otu382	-0.12749	0.0059	0.0327992
Otu435	Otu442	-0.12764	0.0006	0.0059499
Otu364	Otu421	-0.127885	0.0076	0.03917
Otu374	Otu435	-0.128211	0.0019	0.0142483
Otu327	Otu394	-0.128374	0.0038	0.0239599
Otu364	Otu416	-0.1291	0.0015	0.0119349
Otu315	Otu431	-0.129343	0.005	0.0291908
Otu383	Otu402	-0.129473	0.0025	0.0175798
Otu364	Otu413	-0.129722	0.0057	0.0319914
Otu314	Otu327	-0.129902	0.0001	0.00138087
Otu399	Otu427	-0.130429	0.0036	0.0230307
Otu383	Otu388	-0.130699	0.0043	0.0261821
Otu308	Otu440	-0.131619	0.0002	0.00247021
Otu308	Otu327	-0.131741	0.0004	0.00432614
Otu383	Otu416	-0.132728	0.0003	0.00343897
Otu314	Otu390	-0.132826	0.0001	0.00138087
Otu435	Otu440	-0.133575	0.0016	0.0125109
Otu333	Otu358	-0.133664	0.0072	0.0377682
Otu315	Otu414	-0.134342	0.0085	0.0423255
Otu311	Otu333	-0.134697	0.0098	0.0466892
Otu314	Otu374	-0.135125	1.66115e-07	2.75276e-06
Otu382	Otu394	-0.135166	0.0024	0.0170523
Otu309	Otu440	-0.135386	0.0039	0.0244085
Otu311	Otu378	-0.135508	0.0087	0.0429765
Otu308	Otu366	-0.136134	1.66115e-07	2.75276e-06
Otu318	Otu374	-0.13686	0.0049	0.0287612
Otu318	Otu333	-0.136917	0.007	0.0370379
Otu401	Otu409	-0.137276	0.0057	0.0319914
Otu351	Otu394	-0.13905	0.002	0.0148159
Otu366	Otu394	-0.139354	0.0019	0.0142483
Otu366	Otu421	-0.13938	0.0075	0.0388109
Otu374	Otu402	-0.139399	0.0017	0.0130938
Otu308	Otu374	-0.139642	0.0002	0.00247021
Otu314	Otu378	-0.139773	0.0001	0.00138087
Otu383	Otu421	-0.140367	0.0026	0.0181064
Otu314	Otu366	-0.140515	1.66115e-07	2.75276e-06
Otu358	Otu364	-0.140516	0.0026	0.0181064
Otu407	Otu440	-0.14056	0.0048	0.0283645
Otu345	Otu390	-0.140677	0.0081	0.0409674
Otu308	Otu378	-0.141023	1.66115e-07	2.75276e-06
Otu329	Otu432	-0.141079	0.0046	0.0274824
Otu413	Otu440	-0.14115	0.0037	0.023522
Otu315	Otu416	-0.141673	0.0001	0.00138087
Otu312	Otu364	-0.14226	0.0035	0.0225616
Otu312	Otu351	-0.142947	0.0036	0.0230307
Otu327	Otu402	-0.143466	0.0007	0.00669262
Otu358	Otu390	-0.143524	0.0012	0.0100882
Otu383	Otu427	-0.14404	0.0024	0.0170523
Otu394	Otu451	-0.144151	0.0014	0.0113268
Otu309	Otu366	-0.144389	0.0024	0.0170523
Otu309	Otu383	-0.1444	0.0009	0.00810166
Otu399	Otu403	-0.145077	0.0047	0.0279267
Otu327	Otu413	-0.14544	0.0022	0.0159467
Otu315	Otu394	-0.14729	0.0011	0.0094326
Otu315	Otu318	-0.147635	0.0027	0.0186129
Otu327	Otu412	-0.14807	0.0072	0.0377682
Otu351	Otu418	-0.150314	0.008	0.0406141
Otu314	Otu440	-0.150437	1.66115e-07	2.75276e-06
Otu309	Otu378	-0.150554	0.0019	0.0142483
Otu358	Otu396	-0.150703	0.0014	0.0113268
Otu309	Otu327	-0.151065	0.0015	0.0119349
Otu390	Otu394	-0.151819	0.0005	0.00515914
Otu383	Otu431	-0.152677	0.0008	0.00739993
Otu364	Otu435	-0.152704	0.0003	0.00343897
Otu333	Otu394	-0.15305	0.002	0.0148159
Otu313	Otu369	-0.153336	0.0086	0.0426637
Otu378	Otu421	-0.154429	0.0018	0.0136636
Otu328	Otu398	-0.155192	0.0007	0.00669262
Otu311	Otu440	-0.15535	0.0032	0.0211307
Otu392	Otu453	-0.155794	0.0041	0.0253075
Otu328	Otu429	-0.157318	0.0091	0.0443638
Otu333	Otu416	-0.158803	0.0003	0.00343897
Otu314	Otu315	-0.15885	1.66115e-07	2.75276e-06
Otu309	Otu374	-0.159421	0.0009	0.00810166
Otu383	Otu398	-0.159483	0.0001	0.00138087
Otu374	Otu416	-0.159527	0.0002	0.00247021
Otu334	Otu336	-0.160327	0.008	0.0406141
Otu324	Otu349	-0.16068	0.0098	0.0466892
Otu379	Otu409	-0.160849	0.0089	0.0437009
Otu351	Otu439	-0.161367	0.0105	0.0489981
Otu312	Otu387	-0.161583	0.001	0.00878103
Otu390	Otu429	-0.162288	0.0075	0.0388109
Otu436	Otu453	-0.162445	0.0062	0.0339653
Otu333	Otu435	-0.162446	0.001	0.00878103
Otu378	Otu394	-0.162508	0.0011	0.0094326
Otu333	Otu403	-0.163361	0.0052	0.030033
Otu382	Otu439	-0.163791	0.0077	0.0395659
Otu417	Otu419	-0.164494	0.0106	0.0493164
Otu305	Otu331	-0.164771	0.0097	0.0463465
Otu383	Otu435	-0.166316	0.0002	0.00247021
Otu314	Otu383	-0.166378	1.66115e-07	2.75276e-06
Otu329	Otu384	-0.16645	0.0102	0.0479941
Otu308	Otu383	-0.166514	1.66115e-07	2.75276e-06
Otu364	Otu394	-0.167807	0.0002	0.00247021
Otu374	Otu394	-0.168141	0.0002	0.00247021
Otu348	Otu436	-0.168266	0.0102	0.0479941
Otu364	Otu418	-0.16845	0.0043	0.0261821
Otu396	Otu401	-0.168804	0.0029	0.0196269
Otu412	Otu440	-0.169038	0.0022	0.0159467
Otu328	Otu394	-0.171237	1.66115e-07	2.75276e-06
Otu345	Otu374	-0.172468	0.0026	0.0181064
Otu351	Otu358	-0.172729	0.0003	0.00343897
Otu348	Otu377	-0.173273	0.0056	0.0315894
Otu325	Otu379	-0.173335	0.0107	0.0496283
Otu333	Otu439	-0.173689	0.0094	0.0453534
Otu328	Otu423	-0.175943	0.0092	0.0446875
Otu383	Otu413	-0.176987	0.0001	0.00138087
Otu315	Otu317	-0.177252	0.0102	0.0479941
Otu355	Otu409	-0.179939	0.0069	0.0366946
Otu355	Otu362	-0.180094	0.0047	0.0279267
Otu378	Otu439	-0.180652	0.0054	0.0307972
Otu417	Otu440	-0.180663	0.01	0.0473665
Otu309	Otu328	-0.180689	1.66115e-07	2.75276e-06
Otu402	Otu440	-0.182742	1.66115e-07	2.75276e-06
Otu378	Otu428	-0.183768	0.0047	0.0279267
Otu378	Otu435	-0.185198	0.0002	0.00247021
Otu386	Otu409	-0.187632	0.0057	0.0319914
Otu383	Otu394	-0.188185	1.66115e-07	2.75276e-06
Otu316	Otu390	-0.190108	0.0095	0.0456723
Otu308	Otu364	-0.190892	1.66115e-07	2.75276e-06
Otu316	Otu342	-0.191377	0.0103	0.0483491
Otu383	Otu391	-0.192025	0.0067	0.0358995
Otu309	Otu367	-0.192398	1.66115e-07	2.75276e-06
Otu344	Otu355	-0.192613	0.0087	0.0429765
Otu346	Otu439	-0.192668	0.0037	0.023522
Otu316	Otu360	-0.192939	0.0102	0.0479941
Otu326	Otu440	-0.193711	0.0054	0.0307972
Otu317	Otu364	-0.196264	0.0063	0.0343605
Otu328	Otu408	-0.19651	0.0086	0.0426637
Otu314	Otu364	-0.198177	1.66115e-07	2.75276e-06
Otu411	Otu440	-0.198823	0.0101	0.0476792
Otu434	Otu450	-0.199135	0.0087	0.0429765
Otu357	Otu383	-0.199178	0.0088	0.0433346
Otu339	Otu369	-0.19927	0.0047	0.0279267
Otu346	Otu395	-0.200406	0.0083	0.041664
Otu364	Otu412	-0.204777	0.0007	0.00669262
Otu346	Otu391	-0.20536	0.0061	0.0335485
Otu309	Otu364	-0.205713	0.0001	0.00138087
Otu396	Otu404	-0.206223	0.0054	0.0307972
Otu371	Otu408	-0.206263	0.0052	0.030033
Otu325	Otu340	-0.206712	0.0053	0.0303945
Otu374	Otu417	-0.207021	0.0046	0.0274824
Otu315	Otu413	-0.208318	0.0001	0.00138087
Otu383	Otu438	-0.208638	0.007	0.0370379
Otu326	Otu383	-0.208991	0.0016	0.0125109
Otu306	Otu451	-0.2094	0.0097	0.0463465
Otu307	Otu315	-0.210527	0.0036	0.0230307
Otu419	Otu445	-0.210951	0.0061	0.0335485
Otu363	Otu384	-0.211495	0.0051	0.0295991
Otu340	Otu387	-0.214212	0.0051	0.0295991
Otu350	Otu383	-0.214354	0.0002	0.00247021
Otu327	Otu384	-0.215914	0.0067	0.0358995
Otu440	Otu443	-0.219996	0.0023	0.0164975
Otu306	Otu361	-0.220551	0.0069	0.0366946
Otu367	Otu408	-0.221472	0.0035	0.0225616
Otu306	Otu391	-0.222568	0.0039	0.0244085
Otu346	Otu405	-0.222601	0.0017	0.0130938
Otu333	Otu453	-0.227389	0.0002	0.00247021
Otu344	Otu370	-0.228157	0.0039	0.0244085
Otu328	Otu384	-0.228964	0.0036	0.0230307
Otu340	Otu374	-0.229111	0.0033	0.0216375
Otu344	Otu363	-0.229843	0.0056	0.0315894
Otu327	Otu408	-0.230857	0.0036	0.0230307
Otu396	Otu438	-0.233227	0.003	0.020132
Otu319	Otu391	-0.234137	0.002	0.0148159
Otu355	Otu400	-0.234375	0.0005	0.00515914
Otu436	Otu448	-0.234617	0.0022	0.0159467
Otu319	Otu384	-0.234882	0.0042	0.0257508
Otu357	Otu419	-0.235009	0.0019	0.0142483
Otu364	Otu384	-0.248597	0.0019	0.0142483
Otu306	Otu423	-0.249628	0.0007	0.00669262
Otu364	Otu450	-0.25556	0.0018	0.0136636
Otu329	Otu340	-0.260157	0.0003	0.00343897
Otu328	Otu340	-0.264463	0.0006	0.0059499
Otu395	Otu396	-0.266801	0.0006	0.0059499
Otu319	Otu340	-0.270823	0.0007	0.00669262
Otu340	Otu396	-0.27213	0.0002	0.00247021
Otu359	Otu396	-0.278057	0.0003	0.00343897
Otu363	Otu408	-0.278475	0.0001	0.00138087
Otu340	Otu364	-0.296787	0.0002	0.00247021
Otu340	Otu363	-0.313261	0.0001	0.00138087
Otu306	Otu340	-0.314456	1.66115e-07	2.75276e-06
Otu319	Otu395	-0.35459	1.66115e-07	2.75276e-06
Otu306	Otu315	-0.359918	1.66115e-07	2.75276e-06
Otu306	Otu380	-0.364374	1.66115e-07	2.75276e-06
Otu306	Otu395	-0.389886	1.66115e-07	2.75276e-06
