# Supplementary material
Source: HighWire-hosted journal article supplement (https://gut.bmj.com/content/gutjnl-2018-317178)
Supplement: inline-supplementary-material-20 [file inline-supplementary-material-20.docx]

Supplementary table 16

Differential ecological network in control and CRC at family taxonomic level in European validation cohort V2.

Differential bacterial-fungal inter-kingdom co-exclusive interactions in control and CRC

| Diagnosis | Correlation coefficients >0.2 | Correlation coefficients < -0.2 | P value |
| --- | --- | --- | --- |
| Control | 1915 | 1325 | <0.00001 |
| CRC | 1230 | 3048 |

| Diagnosis | Correlation coefficients >0.3 | Correlation coefficients < -0.3 | P value |
| --- | --- | --- | --- |
| Control | 449 | 352 | 0.0023 |
| CRC | 389 | 414 |

| Diagnosis | Correlation coefficients >0.4 | Correlation coefficients < -0.4 | P value |
| --- | --- | --- | --- |
| Control | 83 | 40 | 0.0043 |
| CRC | 34 | 40 |

| Diagnosis | Correlation coefficients >0.5 | Correlation coefficients < -0.5 | P value |
| --- | --- | --- | --- |
| Control | 9 | - | NA |
| CRC | 2 | - |

Differential intra-fungal co-occurrence interactions in control and CRC

| Diagnosis | Correlation coefficients >0.2 | Correlation coefficients < -0.2 | P value |
| --- | --- | --- | --- |
| Control | 115 | 28 | 0.00006 |
| CRC | 389 | 32 |

| Diagnosis | Correlation coefficients >0.3 | Correlation coefficients < -0.3 | P value |
| --- | --- | --- | --- |
| Control | 35 | - | NA |
| CRC | 99 | - |

| Diagnosis | Correlation coefficients >0.4 | Correlation coefficients < -0.4 | P value |
| --- | --- | --- | --- |
| Control | 4 | - | NA |
| CRC | 27 | - |

| Diagnosis | Correlation coefficients >0.5 | Correlation coefficients < -0.5 | P value |
| --- | --- | --- | --- |
| Control | 2 | - | NA |
| CRC | 12 | - |

Fisher’s exact test was performed to compare the ratio of significant co-occurrence and co-excluding correlation coefficients (>0.2 or < -0.2, >0.3 or < -0.3, >0.4 or < -0.4, 0.5 or < -0.5. FDR < 0.05) Control; n=64, CRC; n=88
