# Supplementary material
Source: HighWire-hosted journal article supplement (https://gut.bmj.com/content/gutjnl-2018-317178)
Supplement: inline-supplementary-material-24 [file inline-supplementary-material-24.xls]

## Sheet: Supplementary table 20
Supplementary table 20: Correlations among bacterial and fungal familes in European cohort V2_CRC
Otuid_1	Otuid_2	Correlation_coefficient	P_value	Q_value
Otu167	Otu340	0.506782	1.66115e-07	1.20751e-06
Otu228	Otu346	0.506769	1.66115e-07	1.20751e-06
Otu060	Otu366	0.499396	1.66115e-07	1.20751e-06
Otu135	Otu306	0.495708	1.66115e-07	1.20751e-06
Otu157	Otu340	0.485321	1.66115e-07	1.20751e-06
Otu010	Otu322	0.477809	1.66115e-07	1.20751e-06
Otu085	Otu315	0.457431	1.66115e-07	1.20751e-06
Otu066	Otu366	0.443865	1.66115e-07	1.20751e-06
Otu189	Otu306	0.433827	1.66115e-07	1.20751e-06
Otu245	Otu396	0.431031	1.66115e-07	1.20751e-06
Otu245	Otu440	0.430406	1.66115e-07	1.20751e-06
Otu242	Otu378	0.423443	0.002	0.0116299
Otu173	Otu436	0.42291	1.66115e-07	1.20751e-06
Otu211	Otu395	0.421473	1.66115e-07	1.20751e-06
Otu259	Otu395	0.419973	1.66115e-07	1.20751e-06
Otu084	Otu436	0.417991	1.66115e-07	1.20751e-06
Otu068	Otu390	0.417884	1.66115e-07	1.20751e-06
Otu287	Otu340	0.417222	1.66115e-07	1.20751e-06
Otu202	Otu306	0.413902	1.66115e-07	1.20751e-06
Otu167	Otu359	0.412171	1.66115e-07	1.20751e-06
Otu102	Otu395	0.410735	1.66115e-07	1.20751e-06
Otu259	Otu390	0.407381	1.66115e-07	1.20751e-06
Otu033	Otu306	0.406224	1.66115e-07	1.20751e-06
Otu084	Otu315	0.405972	1.66115e-07	1.20751e-06
Otu222	Otu327	0.40581	1.66115e-07	1.20751e-06
Otu251	Otu396	0.405127	1.66115e-07	1.20751e-06
Otu228	Otu366	0.404015	1.66115e-07	1.20751e-06
Otu088	Otu366	0.403503	1.66115e-07	1.20751e-06
Otu260	Otu396	0.402541	1.66115e-07	1.20751e-06
Otu066	Otu346	0.402539	1.66115e-07	1.20751e-06
Otu173	Otu315	0.401559	0.002	0.0116299
Otu098	Otu366	0.401302	1.66115e-07	1.20751e-06
Otu297	Otu396	0.400371	1.66115e-07	1.20751e-06
Otu212	Otu390	0.40012	1.66115e-07	1.20751e-06
Otu251	Otu440	0.399208	1.66115e-07	1.20751e-06
Otu066	Otu390	0.398628	1.66115e-07	1.20751e-06
Otu215	Otu395	0.396954	1.66115e-07	1.20751e-06
Otu218	Otu327	0.396431	1.66115e-07	1.20751e-06
Otu256	Otu436	0.396386	1.66115e-07	1.20751e-06
Otu059	Otu315	0.395738	1.66115e-07	1.20751e-06
Otu264	Otu344	0.394283	1.66115e-07	1.20751e-06
Otu068	Otu396	0.394065	1.66115e-07	1.20751e-06
Otu040	Otu331	0.393147	1.66115e-07	1.20751e-06
Otu250	Otu366	0.392849	1.66115e-07	1.20751e-06
Otu091	Otu436	0.390583	1.66115e-07	1.20751e-06
Otu021	Otu374	0.39005	1.66115e-07	1.20751e-06
Otu106	Otu315	0.389759	1.66115e-07	1.20751e-06
Otu094	Otu436	0.389385	1.66115e-07	1.20751e-06
Otu176	Otu436	0.389355	1.66115e-07	1.20751e-06
Otu115	Otu357	0.388453	1.66115e-07	1.20751e-06
Otu297	Otu366	0.387814	1.66115e-07	1.20751e-06
Otu052	Otu395	0.387476	1.66115e-07	1.20751e-06
Otu225	Otu396	0.387125	1.66115e-07	1.20751e-06
Otu066	Otu440	0.386867	1.66115e-07	1.20751e-06
Otu099	Otu315	0.386534	0.002	0.0116299
Otu095	Otu395	0.386257	1.66115e-07	1.20751e-06
Otu165	Otu340	0.385725	1.66115e-07	1.20751e-06
Otu180	Otu315	0.385698	1.66115e-07	1.20751e-06
Otu176	Otu315	0.384922	1.66115e-07	1.20751e-06
Otu060	Otu306	0.384591	1.66115e-07	1.20751e-06
Otu085	Otu436	0.384085	1.66115e-07	1.20751e-06
Otu068	Otu366	0.383222	1.66115e-07	1.20751e-06
Otu250	Otu390	0.381356	1.66115e-07	1.20751e-06
Otu095	Otu366	0.38111	1.66115e-07	1.20751e-06
Otu303	Otu346	0.381033	1.66115e-07	1.20751e-06
Otu070	Otu315	0.380856	1.66115e-07	1.20751e-06
Otu243	Otu440	0.380083	1.66115e-07	1.20751e-06
Otu068	Otu315	0.380075	1.66115e-07	1.20751e-06
Otu066	Otu344	0.380002	1.66115e-07	1.20751e-06
Otu251	Otu390	0.378127	1.66115e-07	1.20751e-06
Otu042	Otu438	0.377243	0.002	0.0116299
Otu259	Otu436	0.376894	1.66115e-07	1.20751e-06
Otu228	Otu344	0.376745	1.66115e-07	1.20751e-06
Otu261	Otu396	0.376498	1.66115e-07	1.20751e-06
Otu154	Otu340	0.376352	1.66115e-07	1.20751e-06
Otu095	Otu390	0.376126	1.66115e-07	1.20751e-06
Otu245	Otu366	0.376027	1.66115e-07	1.20751e-06
Otu060	Otu374	0.375605	1.66115e-07	1.20751e-06
Otu266	Otu440	0.375574	1.66115e-07	1.20751e-06
Otu099	Otu436	0.37556	1.66115e-07	1.20751e-06
Otu167	Otu450	0.375467	1.66115e-07	1.20751e-06
Otu055	Otu440	0.374899	1.66115e-07	1.20751e-06
Otu072	Otu315	0.374852	1.66115e-07	1.20751e-06
Otu052	Otu390	0.374554	1.66115e-07	1.20751e-06
Otu072	Otu366	0.374173	1.66115e-07	1.20751e-06
Otu025	Otu390	0.373865	1.66115e-07	1.20751e-06
Otu082	Otu315	0.373475	1.66115e-07	1.20751e-06
Otu117	Otu396	0.373409	1.66115e-07	1.20751e-06
Otu266	Otu374	0.372665	1.66115e-07	1.20751e-06
Otu056	Otu315	0.37155	1.66115e-07	1.20751e-06
Otu105	Otu315	0.371357	1.66115e-07	1.20751e-06
Otu194	Otu322	0.369981	1.66115e-07	1.20751e-06
Otu297	Otu390	0.369492	1.66115e-07	1.20751e-06
Otu095	Otu440	0.368674	1.66115e-07	1.20751e-06
Otu297	Otu344	0.368396	1.66115e-07	1.20751e-06
Otu259	Otu366	0.368119	1.66115e-07	1.20751e-06
Otu190	Otu315	0.367658	1.66115e-07	1.20751e-06
Otu247	Otu396	0.367628	1.66115e-07	1.20751e-06
Otu001	Otu331	0.367413	1.66115e-07	1.20751e-06
Otu082	Otu344	0.366779	1.66115e-07	1.20751e-06
Otu260	Otu315	0.366766	1.66115e-07	1.20751e-06
Otu250	Otu378	0.366724	1.66115e-07	1.20751e-06
Otu084	Otu378	0.366724	1.66115e-07	1.20751e-06
Otu082	Otu378	0.366242	1.66115e-07	1.20751e-06
Otu131	Otu390	0.365862	1.66115e-07	1.20751e-06
Otu067	Otu374	0.365763	1.66115e-07	1.20751e-06
Otu084	Otu395	0.365566	1.66115e-07	1.20751e-06
Otu207	Otu306	0.365258	1.66115e-07	1.20751e-06
Otu256	Otu396	0.365136	1.66115e-07	1.20751e-06
Otu208	Otu323	0.364953	1.66115e-07	1.20751e-06
Otu118	Otu396	0.3647	1.66115e-07	1.20751e-06
Otu260	Otu436	0.364659	1.66115e-07	1.20751e-06
Otu066	Otu378	0.363861	1.66115e-07	1.20751e-06
Otu251	Otu366	0.363055	1.66115e-07	1.20751e-06
Otu245	Otu390	0.362511	1.66115e-07	1.20751e-06
Otu093	Otu344	0.362504	1.66115e-07	1.20751e-06
Otu259	Otu396	0.361882	1.66115e-07	1.20751e-06
Otu082	Otu395	0.361512	1.66115e-07	1.20751e-06
Otu088	Otu315	0.361226	1.66115e-07	1.20751e-06
Otu016	Otu374	0.360863	1.66115e-07	1.20751e-06
Otu264	Otu396	0.360661	1.66115e-07	1.20751e-06
Otu260	Otu390	0.359552	1.66115e-07	1.20751e-06
Otu287	Otu450	0.359318	1.66115e-07	1.20751e-06
Otu114	Otu395	0.358545	1.66115e-07	1.20751e-06
Otu072	Otu344	0.35813	1.66115e-07	1.20751e-06
Otu056	Otu440	0.357603	1.66115e-07	1.20751e-06
Otu245	Otu378	0.357427	1.66115e-07	1.20751e-06
Otu201	Otu346	0.357367	1.66115e-07	1.20751e-06
Otu226	Otu395	0.35684	1.66115e-07	1.20751e-06
Otu028	Otu395	0.356282	1.66115e-07	1.20751e-06
Otu097	Otu440	0.356057	1.66115e-07	1.20751e-06
Otu243	Otu396	0.355669	1.66115e-07	1.20751e-06
Otu089	Otu315	0.355618	1.66115e-07	1.20751e-06
Otu225	Otu395	0.355602	1.66115e-07	1.20751e-06
Otu251	Otu378	0.35526	0.004	0.0206293
Otu092	Otu436	0.355242	1.66115e-07	1.20751e-06
Otu303	Otu306	0.354984	1.66115e-07	1.20751e-06
Otu016	Otu390	0.354527	1.66115e-07	1.20751e-06
Otu259	Otu315	0.354304	1.66115e-07	1.20751e-06
Otu247	Otu390	0.354157	1.66115e-07	1.20751e-06
Otu157	Otu450	0.353815	1.66115e-07	1.20751e-06
Otu096	Otu315	0.353501	1.66115e-07	1.20751e-06
Otu154	Otu359	0.353484	1.66115e-07	1.20751e-06
Otu260	Otu395	0.353477	1.66115e-07	1.20751e-06
Otu052	Otu436	0.353359	1.66115e-07	1.20751e-06
Otu226	Otu396	0.35296	1.66115e-07	1.20751e-06
Otu068	Otu344	0.351716	1.66115e-07	1.20751e-06
Otu226	Otu315	0.35152	1.66115e-07	1.20751e-06
Otu215	Otu436	0.351291	1.66115e-07	1.20751e-06
Otu267	Otu436	0.350766	1.66115e-07	1.20751e-06
Otu015	Otu390	0.350163	1.66115e-07	1.20751e-06
Otu094	Otu315	0.350122	1.66115e-07	1.20751e-06
Otu088	Otu440	0.349889	1.66115e-07	1.20751e-06
Otu070	Otu440	0.349564	1.66115e-07	1.20751e-06
Otu016	Otu395	0.349551	0.002	0.0116299
Otu071	Otu440	0.349231	1.66115e-07	1.20751e-06
Otu056	Otu396	0.348658	1.66115e-07	1.20751e-06
Otu139	Otu436	0.34853	1.66115e-07	1.20751e-06
Otu098	Otu315	0.348161	1.66115e-07	1.20751e-06
Otu169	Otu340	0.348109	1.66115e-07	1.20751e-06
Otu259	Otu440	0.348041	1.66115e-07	1.20751e-06
Otu226	Otu436	0.347961	1.66115e-07	1.20751e-06
Otu066	Otu374	0.347925	1.66115e-07	1.20751e-06
Otu082	Otu366	0.34783	1.66115e-07	1.20751e-06
Otu303	Otu366	0.347227	1.66115e-07	1.20751e-06
Otu030	Otu306	0.346362	1.66115e-07	1.20751e-06
Otu082	Otu390	0.346113	1.66115e-07	1.20751e-06
Otu212	Otu395	0.345808	1.66115e-07	1.20751e-06
Otu158	Otu395	0.345497	1.66115e-07	1.20751e-06
Otu218	Otu319	0.345139	1.66115e-07	1.20751e-06
Otu176	Otu396	0.344617	1.66115e-07	1.20751e-06
Otu228	Otu306	0.344333	1.66115e-07	1.20751e-06
Otu256	Otu440	0.343994	1.66115e-07	1.20751e-06
Otu144	Otu395	0.343585	1.66115e-07	1.20751e-06
Otu242	Otu440	0.343554	1.66115e-07	1.20751e-06
Otu302	Otu340	0.342938	1.66115e-07	1.20751e-06
Otu005	Otu396	0.342767	1.66115e-07	1.20751e-06
Otu016	Otu378	0.342657	0.002	0.0116299
Otu068	Otu395	0.342481	1.66115e-07	1.20751e-06
Otu245	Otu374	0.342352	1.66115e-07	1.20751e-06
Otu271	Otu374	0.342249	1.66115e-07	1.20751e-06
Otu084	Otu344	0.34222	1.66115e-07	1.20751e-06
Otu173	Otu395	0.341848	1.66115e-07	1.20751e-06
Otu015	Otu378	0.341752	1.66115e-07	1.20751e-06
Otu024	Otu395	0.341551	1.66115e-07	1.20751e-06
Otu090	Otu346	0.341196	1.66115e-07	1.20751e-06
Otu249	Otu390	0.340487	1.66115e-07	1.20751e-06
Otu067	Otu366	0.340405	0.002	0.0116299
Otu052	Otu396	0.340326	0.002	0.0116299
Otu094	Otu395	0.340255	1.66115e-07	1.20751e-06
Otu264	Otu390	0.340181	1.66115e-07	1.20751e-06
Otu092	Otu315	0.339682	1.66115e-07	1.20751e-06
Otu091	Otu315	0.339038	1.66115e-07	1.20751e-06
Otu264	Otu366	0.338912	1.66115e-07	1.20751e-06
Otu068	Otu374	0.338558	0.002	0.0116299
Otu066	Otu396	0.338549	1.66115e-07	1.20751e-06
Otu250	Otu395	0.338534	1.66115e-07	1.20751e-06
Otu139	Otu315	0.338507	1.66115e-07	1.20751e-06
Otu108	Otu315	0.33786	1.66115e-07	1.20751e-06
Otu264	Otu374	0.337612	1.66115e-07	1.20751e-06
Otu087	Otu436	0.337536	1.66115e-07	1.20751e-06
Otu273	Otu378	0.337531	1.66115e-07	1.20751e-06
Otu080	Otu440	0.33744	1.66115e-07	1.20751e-06
Otu052	Otu440	0.336968	1.66115e-07	1.20751e-06
Otu229	Otu340	0.336952	1.66115e-07	1.20751e-06
Otu016	Otu366	0.336221	1.66115e-07	1.20751e-06
Otu052	Otu315	0.33598	1.66115e-07	1.20751e-06
Otu098	Otu396	0.335901	1.66115e-07	1.20751e-06
Otu258	Otu378	0.335723	1.66115e-07	1.20751e-06
Otu061	Otu344	0.334666	1.66115e-07	1.20751e-06
Otu250	Otu440	0.334599	1.66115e-07	1.20751e-06
Otu087	Otu366	0.334269	1.66115e-07	1.20751e-06
Otu250	Otu396	0.334009	0.002	0.0116299
Otu011	Otu319	0.333716	1.66115e-07	1.20751e-06
Otu089	Otu436	0.333443	1.66115e-07	1.20751e-06
Otu241	Otu344	0.332781	0.002	0.0116299
Otu072	Otu395	0.332102	0.006	0.0283936
Otu035	Otu319	0.331559	0.002	0.0116299
Otu091	Otu395	0.331253	1.66115e-07	1.20751e-06
Otu248	Otu315	0.331098	1.66115e-07	1.20751e-06
Otu224	Otu357	0.331	1.66115e-07	1.20751e-06
Otu164	Otu340	0.330796	1.66115e-07	1.20751e-06
Otu055	Otu366	0.330652	1.66115e-07	1.20751e-06
Otu019	Otu366	0.330647	1.66115e-07	1.20751e-06
Otu245	Otu344	0.330495	0.002	0.0116299
Otu263	Otu378	0.33043	0.002	0.0116299
Otu251	Otu436	0.330146	1.66115e-07	1.20751e-06
Otu022	Otu440	0.330079	1.66115e-07	1.20751e-06
Otu053	Otu374	0.329706	1.66115e-07	1.20751e-06
Otu056	Otu395	0.329244	0.002	0.0116299
Otu025	Otu366	0.329024	1.66115e-07	1.20751e-06
Otu054	Otu333	0.328877	1.66115e-07	1.20751e-06
Otu056	Otu390	0.328768	1.66115e-07	1.20751e-06
Otu207	Otu419	0.328723	1.66115e-07	1.20751e-06
Otu186	Otu306	0.328343	0.002	0.0116299
Otu245	Otu436	0.328004	1.66115e-07	1.20751e-06
Otu015	Otu366	0.327709	1.66115e-07	1.20751e-06
Otu235	Otu347	0.327548	1.66115e-07	1.20751e-06
Otu180	Otu436	0.327408	1.66115e-07	1.20751e-06
Otu070	Otu390	0.32737	1.66115e-07	1.20751e-06
Otu016	Otu436	0.327246	1.66115e-07	1.20751e-06
Otu158	Otu340	0.327111	1.66115e-07	1.20751e-06
Otu185	Otu307	0.325948	1.66115e-07	1.20751e-06
Otu256	Otu395	0.325854	0.002	0.0116299
Otu090	Otu344	0.325773	1.66115e-07	1.20751e-06
Otu212	Otu396	0.325166	0.002	0.0116299
Otu225	Otu390	0.32492	0.004	0.0206293
Otu016	Otu440	0.324845	1.66115e-07	1.20751e-06
Otu081	Otu436	0.324815	1.66115e-07	1.20751e-06
Otu242	Otu374	0.324688	0.002	0.0116299
Otu192	Otu327	0.324362	1.66115e-07	1.20751e-06
Otu092	Otu395	0.324211	0.002	0.0116299
Otu270	Otu395	0.324151	1.66115e-07	1.20751e-06
Otu070	Otu436	0.32392	0.002	0.0116299
Otu260	Otu440	0.323873	1.66115e-07	1.20751e-06
Otu041	Otu390	0.323099	1.66115e-07	1.20751e-06
Otu055	Otu374	0.322988	1.66115e-07	1.20751e-06
Otu071	Otu436	0.322935	1.66115e-07	1.20751e-06
Otu243	Otu374	0.322931	1.66115e-07	1.20751e-06
Otu104	Otu436	0.322663	1.66115e-07	1.20751e-06
Otu226	Otu374	0.322113	1.66115e-07	1.20751e-06
Otu243	Otu344	0.321708	1.66115e-07	1.20751e-06
Otu005	Otu344	0.3216	0.002	0.0116299
Otu052	Otu374	0.321592	1.66115e-07	1.20751e-06
Otu070	Otu396	0.32113	1.66115e-07	1.20751e-06
Otu167	Otu391	0.320867	1.66115e-07	1.20751e-06
Otu094	Otu390	0.320703	1.66115e-07	1.20751e-06
Otu191	Otu306	0.320691	1.66115e-07	1.20751e-06
Otu156	Otu331	0.320399	1.66115e-07	1.20751e-06
Otu041	Otu344	0.319929	1.66115e-07	1.20751e-06
Otu088	Otu344	0.318986	1.66115e-07	1.20751e-06
Otu056	Otu436	0.318809	1.66115e-07	1.20751e-06
Otu211	Otu315	0.31874	1.66115e-07	1.20751e-06
Otu146	Otu315	0.318705	1.66115e-07	1.20751e-06
Otu067	Otu315	0.318621	0.002	0.0116299
Otu060	Otu440	0.318298	1.66115e-07	1.20751e-06
Otu002	Otu306	0.318281	0.002	0.0116299
Otu226	Otu440	0.31804	0.004	0.0206293
Otu069	Otu315	0.317845	1.66115e-07	1.20751e-06
Otu085	Otu378	0.317836	0.002	0.0116299
Otu226	Otu366	0.317392	0.002	0.0116299
Otu157	Otu451	0.317009	1.66115e-07	1.20751e-06
Otu005	Otu366	0.317005	0.002	0.0116299
Otu055	Otu390	0.316682	1.66115e-07	1.20751e-06
Otu204	Otu316	0.31665	1.66115e-07	1.20751e-06
Otu061	Otu395	0.316535	0.002	0.0116299
Otu054	Otu440	0.316141	0.002	0.0116299
Otu072	Otu440	0.316081	1.66115e-07	1.20751e-06
Otu139	Otu395	0.315883	1.66115e-07	1.20751e-06
Otu266	Otu378	0.315707	1.66115e-07	1.20751e-06
Otu060	Otu344	0.315664	0.002	0.0116299
Otu094	Otu440	0.315531	1.66115e-07	1.20751e-06
Otu294	Otu451	0.315426	1.66115e-07	1.20751e-06
Otu208	Otu328	0.314989	0.002	0.0116299
Otu273	Otu440	0.314909	1.66115e-07	1.20751e-06
Otu087	Otu315	0.314601	1.66115e-07	1.20751e-06
Otu061	Otu315	0.314243	0.002	0.0116299
Otu005	Otu440	0.313894	0.004	0.0206293
Otu098	Otu374	0.31371	0.002	0.0116299
Otu233	Otu395	0.313432	1.66115e-07	1.20751e-06
Otu090	Otu366	0.313353	1.66115e-07	1.20751e-06
Otu118	Otu440	0.313315	1.66115e-07	1.20751e-06
Otu278	Otu323	0.313159	1.66115e-07	1.20751e-06
Otu250	Otu374	0.312995	1.66115e-07	1.20751e-06
Otu220	Otu396	0.312841	1.66115e-07	1.20751e-06
Otu267	Otu347	0.312743	1.66115e-07	1.20751e-06
Otu245	Otu395	0.312741	1.66115e-07	1.20751e-06
Otu099	Otu396	0.312726	1.66115e-07	1.20751e-06
Otu072	Otu390	0.312721	0.002	0.0116299
Otu005	Otu395	0.312682	1.66115e-07	1.20751e-06
Otu021	Otu390	0.3122	1.66115e-07	1.20751e-06
Otu035	Otu341	0.311782	1.66115e-07	1.20751e-06
Otu005	Otu436	0.31167	1.66115e-07	1.20751e-06
Otu061	Otu440	0.311653	0.004	0.0206293
Otu078	Otu344	0.311629	0.004	0.0206293
Otu276	Otu440	0.311433	1.66115e-07	1.20751e-06
Otu180	Otu440	0.31131	0.002	0.0116299
Otu035	Otu331	0.311304	0.002	0.0116299
Otu240	Otu344	0.31112	0.002	0.0116299
Otu142	Otu347	0.311021	1.66115e-07	1.20751e-06
Otu157	Otu388	0.310848	1.66115e-07	1.20751e-06
Otu228	Otu440	0.310686	0.002	0.0116299
Otu192	Otu324	0.310568	1.66115e-07	1.20751e-06
Otu167	Otu384	0.310531	1.66115e-07	1.20751e-06
Otu056	Otu366	0.310243	1.66115e-07	1.20751e-06
Otu270	Otu440	0.310084	0.002	0.0116299
Otu015	Otu396	0.310064	1.66115e-07	1.20751e-06
Otu095	Otu315	0.309705	0.004	0.0206293
Otu106	Otu395	0.309679	1.66115e-07	1.20751e-06
Otu226	Otu390	0.309544	0.002	0.0116299
Otu021	Otu366	0.309373	0.002	0.0116299
Otu157	Otu384	0.309284	1.66115e-07	1.20751e-06
Otu056	Otu378	0.309263	0.004	0.0206293
Otu247	Otu378	0.308985	1.66115e-07	1.20751e-06
Otu157	Otu308	0.308704	1.66115e-07	1.20751e-06
Otu218	Otu451	0.308535	1.66115e-07	1.20751e-06
Otu215	Otu315	0.308456	0.002	0.0116299
Otu156	Otu359	0.308432	1.66115e-07	1.20751e-06
Otu143	Otu390	0.308344	1.66115e-07	1.20751e-06
Otu278	Otu327	0.308075	0.002	0.0116299
Otu242	Otu396	0.307832	1.66115e-07	1.20751e-06
Otu091	Otu440	0.307762	1.66115e-07	1.20751e-06
Otu053	Otu344	0.307625	0.002	0.0116299
Otu187	Otu307	0.307473	1.66115e-07	1.20751e-06
Otu024	Otu315	0.307086	1.66115e-07	1.20751e-06
Otu053	Otu396	0.306565	1.66115e-07	1.20751e-06
Otu016	Otu344	0.30656	1.66115e-07	1.20751e-06
Otu067	Otu378	0.306417	1.66115e-07	1.20751e-06
Otu115	Otu337	0.306347	0.002	0.0116299
Otu098	Otu440	0.306318	0.002	0.0116299
Otu118	Otu378	0.306225	0.002	0.0116299
Otu218	Otu311	0.305715	1.66115e-07	1.20751e-06
Otu093	Otu378	0.30551	1.66115e-07	1.20751e-06
Otu260	Otu366	0.305374	0.002	0.0116299
Otu088	Otu395	0.305052	1.66115e-07	1.20751e-06
Otu115	Otu365	0.30496	1.66115e-07	1.20751e-06
Otu256	Otu366	0.304835	1.66115e-07	1.20751e-06
Otu021	Otu395	0.304787	1.66115e-07	1.20751e-06
Otu276	Otu378	0.304671	0.002	0.0116299
Otu184	Otu307	0.304642	1.66115e-07	1.20751e-06
Otu218	Otu314	0.304527	1.66115e-07	1.20751e-06
Otu197	Otu331	0.304452	1.66115e-07	1.20751e-06
Otu089	Otu395	0.304304	1.66115e-07	1.20751e-06
Otu278	Otu316	0.304182	1.66115e-07	1.20751e-06
Otu157	Otu391	0.304172	1.66115e-07	1.20751e-06
Otu022	Otu395	0.304102	0.004	0.0206293
Otu251	Otu374	0.303919	1.66115e-07	1.20751e-06
Otu118	Otu374	0.303755	1.66115e-07	1.20751e-06
Otu042	Otu365	0.303617	0.002	0.0116299
Otu104	Otu395	0.303356	0.002	0.0116299
Otu261	Otu315	0.302979	1.66115e-07	1.20751e-06
Otu067	Otu344	0.302946	0.006	0.0283936
Otu243	Otu390	0.302764	1.66115e-07	1.20751e-06
Otu226	Otu378	0.302536	1.66115e-07	1.20751e-06
Otu287	Otu384	0.302316	1.66115e-07	1.20751e-06
Otu225	Otu315	0.302315	1.66115e-07	1.20751e-06
Otu264	Otu440	0.302289	1.66115e-07	1.20751e-06
Otu190	Otu395	0.302009	1.66115e-07	1.20751e-06
Otu110	Otu365	0.302007	1.66115e-07	1.20751e-06
Otu098	Otu395	0.30178	1.66115e-07	1.20751e-06
Otu151	Otu440	0.301733	0.002	0.0116299
Otu099	Otu395	0.301446	0.002	0.0116299
Otu250	Otu315	0.301289	1.66115e-07	1.20751e-06
Otu130	Otu306	0.301204	0.002	0.0116299
Otu262	Otu395	0.300969	1.66115e-07	1.20751e-06
Otu162	Otu340	0.300919	0.004	0.0206293
Otu060	Otu390	0.300813	0.002	0.0116299
Otu199	Otu306	0.300396	1.66115e-07	1.20751e-06
Otu176	Otu395	0.30021	1.66115e-07	1.20751e-06
Otu204	Otu306	0.299986	0.006	0.0283936
Otu241	Otu378	0.299921	0.006	0.0283936
Otu087	Otu378	0.299548	0.004	0.0206293
Otu229	Otu450	0.299425	1.66115e-07	1.20751e-06
Otu098	Otu344	0.29941	0.006	0.0283936
Otu096	Otu395	0.299365	0.002	0.0116299
Otu085	Otu440	0.29934	0.002	0.0116299
Otu071	Otu366	0.298596	0.002	0.0116299
Otu025	Otu344	0.298428	0.002	0.0116299
Otu071	Otu374	0.298316	0.002	0.0116299
Otu067	Otu440	0.298313	0.004	0.0206293
Otu087	Otu344	0.298231	0.004	0.0206293
Otu071	Otu395	0.29799	1.66115e-07	1.20751e-06
Otu297	Otu374	0.297979	0.002	0.0116299
Otu053	Otu366	0.297963	0.002	0.0116299
Otu243	Otu366	0.297909	0.002	0.0116299
Otu119	Otu315	0.297904	1.66115e-07	1.20751e-06
Otu099	Otu390	0.297885	1.66115e-07	1.20751e-06
Otu157	Otu394	0.297784	1.66115e-07	1.20751e-06
Otu024	Otu436	0.297286	1.66115e-07	1.20751e-06
Otu277	Otu316	0.296856	1.66115e-07	1.20751e-06
Otu205	Otu315	0.296791	1.66115e-07	1.20751e-06
Otu085	Otu366	0.296653	0.002	0.0116299
Otu061	Otu390	0.296315	1.66115e-07	1.20751e-06
Otu061	Otu366	0.296117	1.66115e-07	1.20751e-06
Otu264	Otu315	0.295976	0.004	0.0206293
Otu043	Otu419	0.29595	1.66115e-07	1.20751e-06
Otu057	Otu390	0.295898	1.66115e-07	1.20751e-06
Otu061	Otu378	0.295878	0.002	0.0116299
Otu263	Otu440	0.295579	1.66115e-07	1.20751e-06
Otu079	Otu306	0.295346	0.012	0.0479766
Otu211	Otu390	0.295227	0.002	0.0116299
Otu144	Otu315	0.295166	1.66115e-07	1.20751e-06
Otu164	Otu359	0.294904	1.66115e-07	1.20751e-06
Otu084	Otu366	0.294895	1.66115e-07	1.20751e-06
Otu053	Otu390	0.294864	0.004	0.0206293
Otu256	Otu378	0.29475	1.66115e-07	1.20751e-06
Otu226	Otu344	0.294181	1.66115e-07	1.20751e-06
Otu215	Otu390	0.293935	0.002	0.0116299
Otu231	Otu378	0.293758	1.66115e-07	1.20751e-06
Otu025	Otu374	0.293675	0.002	0.0116299
Otu197	Otu445	0.293405	1.66115e-07	1.20751e-06
Otu158	Otu315	0.293088	1.66115e-07	1.20751e-06
Otu092	Otu396	0.292914	1.66115e-07	1.20751e-06
Otu078	Otu440	0.292904	1.66115e-07	1.20751e-06
Otu092	Otu440	0.292695	1.66115e-07	1.20751e-06
Otu225	Otu436	0.292492	1.66115e-07	1.20751e-06
Otu268	Otu315	0.292202	1.66115e-07	1.20751e-06
Otu184	Otu323	0.29219	1.66115e-07	1.20751e-06
Otu228	Otu333	0.292049	0.002	0.0116299
Otu042	Otu317	0.291961	0.002	0.0116299
Otu044	Otu306	0.291398	0.004	0.0206293
Otu101	Otu342	0.291309	0.002	0.0116299
Otu118	Otu390	0.291302	1.66115e-07	1.20751e-06
Otu144	Otu374	0.291294	1.66115e-07	1.20751e-06
Otu271	Otu395	0.291238	0.002	0.0116299
Otu208	Otu419	0.291206	1.66115e-07	1.20751e-06
Otu267	Otu395	0.290927	0.006	0.0283936
Otu217	Otu306	0.29085	0.004	0.0206293
Otu157	Otu309	0.290716	1.66115e-07	1.20751e-06
Otu098	Otu390	0.290599	0.004	0.0206293
Otu179	Otu340	0.289844	0.002	0.0116299
Otu240	Otu390	0.289833	0.002	0.0116299
Otu015	Otu344	0.289827	1.66115e-07	1.20751e-06
Otu239	Otu396	0.289662	1.66115e-07	1.20751e-06
Otu211	Otu396	0.289591	1.66115e-07	1.20751e-06
Otu084	Otu440	0.28954	1.66115e-07	1.20751e-06
Otu119	Otu395	0.289504	1.66115e-07	1.20751e-06
Otu061	Otu436	0.289294	1.66115e-07	1.20751e-06
Otu247	Otu366	0.288937	0.002	0.0116299
Otu147	Otu316	0.288638	1.66115e-07	1.20751e-06
Otu071	Otu396	0.288466	1.66115e-07	1.20751e-06
Otu025	Otu315	0.288429	0.002	0.0116299
Otu199	Otu316	0.288421	1.66115e-07	1.20751e-06
Otu163	Otu340	0.288357	1.66115e-07	1.20751e-06
Otu249	Otu315	0.288275	0.004	0.0206293
Otu251	Otu315	0.287977	0.002	0.0116299
Otu108	Otu390	0.287958	0.002	0.0116299
Otu180	Otu396	0.287199	1.66115e-07	1.20751e-06
Otu085	Otu344	0.287044	0.004	0.0206293
Otu085	Otu395	0.286838	0.004	0.0206293
Otu025	Otu395	0.286545	0.004	0.0206293
Otu144	Otu396	0.286261	1.66115e-07	1.20751e-06
Otu055	Otu315	0.286256	0.002	0.0116299
Otu015	Otu436	0.285852	1.66115e-07	1.20751e-06
Otu279	Otu307	0.285819	1.66115e-07	1.20751e-06
Otu233	Otu396	0.285801	0.004	0.0206293
Otu208	Otu365	0.285746	0.002	0.0116299
Otu169	Otu315	0.285391	0.002	0.0116299
Otu187	Otu316	0.285373	1.66115e-07	1.20751e-06
Otu264	Otu378	0.285271	0.002	0.0116299
Otu180	Otu366	0.285098	0.002	0.0116299
Otu180	Otu390	0.28501	1.66115e-07	1.20751e-06
Otu082	Otu436	0.285009	1.66115e-07	1.20751e-06
Otu070	Otu366	0.285007	0.002	0.0116299
Otu258	Otu436	0.284928	1.66115e-07	1.20751e-06
Otu070	Otu344	0.284816	0.006	0.0283936
Otu242	Otu366	0.284579	1.66115e-07	1.20751e-06
Otu280	Otu336	0.284502	0.002	0.0116299
Otu218	Otu388	0.283863	1.66115e-07	1.20751e-06
Otu052	Otu366	0.283676	0.002	0.0116299
Otu260	Otu347	0.283635	0.008	0.0354402
Otu235	Otu436	0.283171	1.66115e-07	1.20751e-06
Otu180	Otu395	0.282966	0.004	0.0206293
Otu286	Otu395	0.282873	0.004	0.0206293
Otu067	Otu390	0.282848	1.66115e-07	1.20751e-06
Otu043	Otu316	0.28269	1.66115e-07	1.20751e-06
Otu098	Otu436	0.282499	0.002	0.0116299
Otu102	Otu374	0.282495	0.006	0.0283936
Otu186	Otu307	0.282337	1.66115e-07	1.20751e-06
Otu268	Otu396	0.282279	0.002	0.0116299
Otu222	Otu339	0.282242	1.66115e-07	1.20751e-06
Otu228	Otu396	0.282044	1.66115e-07	1.20751e-06
Otu256	Otu315	0.282006	0.002	0.0116299
Otu054	Otu344	0.281982	0.006	0.0283936
Otu005	Otu390	0.281966	0.002	0.0116299
Otu068	Otu440	0.281771	1.66115e-07	1.20751e-06
Otu261	Otu436	0.281523	1.66115e-07	1.20751e-06
Otu021	Otu344	0.28124	0.002	0.0116299
Otu197	Otu419	0.281185	1.66115e-07	1.20751e-06
Otu121	Otu306	0.281047	1.66115e-07	1.20751e-06
Otu088	Otu396	0.280986	0.002	0.0116299
Otu212	Otu344	0.280929	0.002	0.0116299
Otu008	Otu383	0.280892	1.66115e-07	1.20751e-06
Otu053	Otu315	0.280883	0.002	0.0116299
Otu041	Otu378	0.280857	0.004	0.0206293
Otu091	Otu374	0.280706	0.002	0.0116299
Otu146	Otu378	0.280669	0.006	0.0283936
Otu082	Otu374	0.280645	0.004	0.0206293
Otu040	Otu306	0.280587	0.002	0.0116299
Otu256	Otu390	0.280389	0.004	0.0206293
Otu054	Otu366	0.280329	0.004	0.0206293
Otu201	Otu333	0.280328	0.002	0.0116299
Otu116	Otu357	0.280272	0.002	0.0116299
Otu218	Otu401	0.280261	1.66115e-07	1.20751e-06
Otu032	Otu440	0.280145	0.002	0.0116299
Otu084	Otu396	0.27988	0.002	0.0116299
Otu215	Otu396	0.279741	0.002	0.0116299
Otu286	Otu436	0.279405	1.66115e-07	1.20751e-06
Otu184	Otu316	0.27915	1.66115e-07	1.20751e-06
Otu259	Otu374	0.279074	1.66115e-07	1.20751e-06
Otu062	Otu306	0.278986	0.01	0.0419479
Otu042	Otu357	0.278674	0.004	0.0206293
Otu085	Otu390	0.27856	0.002	0.0116299
Otu241	Otu440	0.27843	0.002	0.0116299
Otu112	Otu306	0.278409	1.66115e-07	1.20751e-06
Otu303	Otu344	0.278332	0.002	0.0116299
Otu215	Otu347	0.278282	0.002	0.0116299
Otu053	Otu378	0.278122	0.012	0.0479766
Otu118	Otu436	0.278076	0.002	0.0116299
Otu102	Otu315	0.277842	1.66115e-07	1.20751e-06
Otu146	Otu395	0.277714	0.002	0.0116299
Otu025	Otu396	0.277688	1.66115e-07	1.20751e-06
Otu176	Otu390	0.277612	0.002	0.0116299
Otu260	Otu374	0.27745	1.66115e-07	1.20751e-06
Otu251	Otu395	0.277156	0.004	0.0206293
Otu252	Otu440	0.276838	0.002	0.0116299
Otu087	Otu395	0.276514	0.002	0.0116299
Otu072	Otu396	0.276335	0.006	0.0283936
Otu260	Otu378	0.276285	0.002	0.0116299
Otu157	Otu413	0.276273	1.66115e-07	1.20751e-06
Otu173	Otu440	0.276018	0.002	0.0116299
Otu076	Otu453	0.275868	1.66115e-07	1.20751e-06
Otu057	Otu440	0.275753	0.006	0.0283936
Otu204	Otu331	0.275677	0.004	0.0206293
Otu016	Otu315	0.275231	1.66115e-07	1.20751e-06
Otu261	Otu344	0.275108	0.002	0.0116299
Otu067	Otu396	0.275021	0.004	0.0206293
Otu090	Otu390	0.274916	0.002	0.0116299
Otu099	Otu366	0.274884	0.008	0.0354402
Otu016	Otu396	0.274848	0.006	0.0283936
Otu268	Otu390	0.274502	1.66115e-07	1.20751e-06
Otu115	Otu327	0.274458	0.002	0.0116299
Otu259	Otu344	0.274383	0.002	0.0116299
Otu080	Otu436	0.274345	1.66115e-07	1.20751e-06
Otu197	Otu307	0.274216	1.66115e-07	1.20751e-06
Otu006	Otu319	0.274067	0.004	0.0206293
Otu271	Otu396	0.274065	1.66115e-07	1.20751e-06
Otu225	Otu366	0.274053	1.66115e-07	1.20751e-06
Otu106	Otu436	0.273927	1.66115e-07	1.20751e-06
Otu250	Otu344	0.273475	1.66115e-07	1.20751e-06
Otu091	Otu396	0.273323	0.004	0.0206293
Otu208	Otu359	0.273279	0.004	0.0206293
Otu053	Otu440	0.273053	0.004	0.0206293
Otu220	Otu378	0.272643	0.002	0.0116299
Otu139	Otu396	0.272629	0.002	0.0116299
Otu071	Otu315	0.272308	0.004	0.0206293
Otu022	Otu374	0.27228	1.66115e-07	1.20751e-06
Otu042	Otu452	0.272227	0.006	0.0283936
Otu287	Otu359	0.272156	1.66115e-07	1.20751e-06
Otu055	Otu396	0.272128	1.66115e-07	1.20751e-06
Otu055	Otu344	0.272034	0.004	0.0206293
Otu272	Otu396	0.272026	0.002	0.0116299
Otu218	Otu369	0.271977	1.66115e-07	1.20751e-06
Otu065	Otu316	0.271638	1.66115e-07	1.20751e-06
Otu202	Otu419	0.271363	1.66115e-07	1.20751e-06
Otu088	Otu333	0.271102	0.008	0.0354402
Otu052	Otu378	0.27102	0.002	0.0116299
Otu208	Otu369	0.270912	1.66115e-07	1.20751e-06
Otu157	Otu435	0.270873	1.66115e-07	1.20751e-06
Otu160	Otu331	0.270866	0.004	0.0206293
Otu098	Otu333	0.27047	0.006	0.0283936
Otu231	Otu436	0.270464	0.002	0.0116299
Otu078	Otu366	0.270347	0.008	0.0354402
Otu271	Otu440	0.270253	0.004	0.0206293
Otu143	Otu440	0.270141	1.66115e-07	1.20751e-06
Otu251	Otu344	0.269763	0.004	0.0206293
Otu095	Otu436	0.269299	0.004	0.0206293
Otu192	Otu323	0.269266	0.004	0.0206293
Otu157	Otu433	0.269214	1.66115e-07	1.20751e-06
Otu247	Otu315	0.26897	0.002	0.0116299
Otu157	Otu416	0.268855	1.66115e-07	1.20751e-06
Otu249	Otu366	0.268555	0.004	0.0206293
Otu025	Otu440	0.268061	0.004	0.0206293
Otu279	Otu316	0.267981	1.66115e-07	1.20751e-06
Otu091	Otu372	0.267912	1.66115e-07	1.20751e-06
Otu074	Otu450	0.267898	0.004	0.0206293
Otu218	Otu437	0.267819	1.66115e-07	1.20751e-06
Otu114	Otu390	0.267783	1.66115e-07	1.20751e-06
Otu213	Otu306	0.267776	0.006	0.0283936
Otu090	Otu440	0.26774	0.01	0.0419479
Otu188	Otu306	0.26758	0.008	0.0354402
Otu015	Otu347	0.267531	0.002	0.0116299
Otu218	Otu313	0.267439	1.66115e-07	1.20751e-06
Otu176	Otu440	0.267337	0.004	0.0206293
Otu198	Otu316	0.267159	1.66115e-07	1.20751e-06
Otu220	Otu383	0.266981	1.66115e-07	1.20751e-06
Otu194	Otu438	0.266976	0.01	0.0419479
Otu297	Otu315	0.266725	0.004	0.0206293
Otu118	Otu344	0.266672	0.004	0.0206293
Otu164	Otu450	0.26666	0.002	0.0116299
Otu272	Otu390	0.266649	0.002	0.0116299
Otu093	Otu396	0.266042	0.002	0.0116299
Otu143	Otu315	0.266025	0.004	0.0206293
Otu274	Otu440	0.265832	0.008	0.0354402
Otu278	Otu419	0.265731	0.002	0.0116299
Otu059	Otu436	0.265705	0.004	0.0206293
Otu059	Otu396	0.265689	1.66115e-07	1.20751e-06
Otu092	Otu378	0.265623	1.66115e-07	1.20751e-06
Otu071	Otu390	0.26559	1.66115e-07	1.20751e-06
Otu292	Otu395	0.265584	0.004	0.0206293
Otu087	Otu374	0.265469	0.002	0.0116299
Otu087	Otu440	0.265101	1.66115e-07	1.20751e-06
Otu074	Otu340	0.264997	0.002	0.0116299
Otu079	Otu440	0.264984	1.66115e-07	1.20751e-06
Otu015	Otu315	0.264648	1.66115e-07	1.20751e-06
Otu045	Otu384	0.264326	0.002	0.0116299
Otu218	Otu318	0.264058	1.66115e-07	1.20751e-06
Otu151	Otu374	0.26405	1.66115e-07	1.20751e-06
Otu185	Otu316	0.263905	0.004	0.0206293
Otu290	Otu307	0.263815	1.66115e-07	1.20751e-06
Otu022	Otu378	0.26379	0.006	0.0283936
Otu205	Otu395	0.26362	1.66115e-07	1.20751e-06
Otu115	Otu444	0.263582	0.002	0.0116299
Otu209	Otu306	0.263374	0.006	0.0283936
Otu112	Otu365	0.263373	0.004	0.0206293
Otu157	Otu313	0.263316	1.66115e-07	1.20751e-06
Otu067	Otu436	0.263001	0.002	0.0116299
Otu280	Otu306	0.262869	0.01	0.0419479
Otu263	Otu366	0.262809	1.66115e-07	1.20751e-06
Otu228	Otu408	0.262764	1.66115e-07	1.20751e-06
Otu280	Otu316	0.262562	1.66115e-07	1.20751e-06
Otu225	Otu347	0.262536	0.002	0.0116299
Otu220	Otu366	0.262514	0.004	0.0206293
Otu257	Otu374	0.262465	0.008	0.0354402
Otu181	Otu400	0.262434	1.66115e-07	1.20751e-06
Otu143	Otu366	0.262157	0.006	0.0283936
Otu193	Otu307	0.261986	1.66115e-07	1.20751e-06
Otu260	Otu372	0.261982	1.66115e-07	1.20751e-06
Otu042	Otu359	0.261599	0.01	0.0419479
Otu154	Otu450	0.261332	0.002	0.0116299
Otu263	Otu395	0.261265	0.002	0.0116299
Otu268	Otu436	0.261071	1.66115e-07	1.20751e-06
Otu208	Otu453	0.261051	1.66115e-07	1.20751e-06
Otu076	Otu345	0.260938	1.66115e-07	1.20751e-06
Otu214	Otu306	0.26071	0.008	0.0354402
Otu095	Otu396	0.260684	0.004	0.0206293
Otu042	Otu445	0.260562	0.004	0.0206293
Otu059	Otu390	0.260503	0.006	0.0283936
Otu274	Otu378	0.26042	0.008	0.0354402
Otu088	Otu436	0.260399	1.66115e-07	1.20751e-06
Otu256	Otu374	0.260365	0.002	0.0116299
Otu190	Otu347	0.260276	0.002	0.0116299
Otu209	Otu382	0.260202	0.002	0.0116299
Otu202	Otu365	0.260038	0.006	0.0283936
Otu057	Otu306	0.260036	0.012	0.0479766
Otu048	Otu378	0.259978	1.66115e-07	1.20751e-06
Otu153	Otu435	0.259731	1.66115e-07	1.20751e-06
Otu094	Otu366	0.259709	0.004	0.0206293
Otu276	Otu374	0.259647	0.002	0.0116299
Otu095	Otu374	0.259607	0.004	0.0206293
Otu130	Otu331	0.259525	1.66115e-07	1.20751e-06
Otu250	Otu436	0.259481	0.006	0.0283936
Otu060	Otu396	0.259422	0.002	0.0116299
Otu142	Otu396	0.259366	1.66115e-07	1.20751e-06
Otu099	Otu374	0.259295	0.008	0.0354402
Otu157	Otu345	0.259167	1.66115e-07	1.20751e-06
Otu102	Otu390	0.259139	0.002	0.0116299
Otu042	Otu323	0.25905	1.66115e-07	1.20751e-06
Otu222	Otu446	0.258804	1.66115e-07	1.20751e-06
Otu092	Otu390	0.258657	1.66115e-07	1.20751e-06
Otu197	Otu316	0.258626	0.002	0.0116299
Otu091	Otu366	0.258572	0.006	0.0283936
Otu082	Otu346	0.25821	0.004	0.0206293
Otu013	Otu331	0.258	0.002	0.0116299
Otu239	Otu436	0.257915	0.002	0.0116299
Otu245	Otu315	0.257851	0.004	0.0206293
Otu110	Otu306	0.257725	0.006	0.0283936
Otu230	Otu396	0.257592	0.008	0.0354402
Otu004	Otu316	0.257433	1.66115e-07	1.20751e-06
Otu216	Otu396	0.257243	0.006	0.0283936
Otu091	Otu390	0.257236	0.002	0.0116299
Otu072	Otu378	0.257216	0.004	0.0206293
Otu068	Otu436	0.257197	1.66115e-07	1.20751e-06
Otu218	Otu312	0.257184	1.66115e-07	1.20751e-06
Otu021	Otu315	0.257165	0.006	0.0283936
Otu260	Otu344	0.256911	0.002	0.0116299
Otu053	Otu395	0.256769	0.006	0.0283936
Otu279	Otu323	0.256751	1.66115e-07	1.20751e-06
Otu108	Otu436	0.256503	0.002	0.0116299
Otu084	Otu374	0.256349	0.002	0.0116299
Otu169	Otu436	0.256245	0.002	0.0116299
Otu190	Otu396	0.256123	0.008	0.0354402
Otu240	Otu440	0.25609	0.002	0.0116299
Otu104	Otu315	0.256005	0.006	0.0283936
Otu187	Otu419	0.255854	1.66115e-07	1.20751e-06
Otu072	Otu436	0.255853	0.01	0.0419479
Otu241	Otu396	0.25585	0.004	0.0206293
Otu088	Otu390	0.255777	0.006	0.0283936
Otu215	Otu344	0.255719	0.002	0.0116299
Otu121	Otu316	0.255662	1.66115e-07	1.20751e-06
Otu084	Otu410	0.255579	1.66115e-07	1.20751e-06
Otu261	Otu372	0.255427	1.66115e-07	1.20751e-06
Otu181	Otu307	0.255337	1.66115e-07	1.20751e-06
Otu201	Otu344	0.255234	0.006	0.0283936
Otu217	Otu419	0.255033	0.002	0.0116299
Otu028	Otu396	0.254931	0.008	0.0354402
Otu297	Otu440	0.254817	0.008	0.0354402
Otu240	Otu366	0.254813	1.66115e-07	1.20751e-06
Otu218	Otu431	0.254784	1.66115e-07	1.20751e-06
Otu157	Otu359	0.254714	0.006	0.0283936
Otu250	Otu347	0.254625	0.004	0.0206293
Otu146	Otu436	0.254516	0.004	0.0206293
Otu080	Otu366	0.254488	0.002	0.0116299
Otu266	Otu366	0.254469	1.66115e-07	1.20751e-06
Otu239	Otu440	0.254269	0.004	0.0206293
Otu301	Otu367	0.254169	0.008	0.0354402
Otu249	Otu396	0.254155	0.002	0.0116299
Otu198	Otu419	0.254074	1.66115e-07	1.20751e-06
Otu186	Otu316	0.253966	0.006	0.0283936
Otu212	Otu436	0.253893	1.66115e-07	1.20751e-06
Otu263	Otu396	0.253755	0.002	0.0116299
Otu240	Otu333	0.253742	0.006	0.0283936
Otu179	Otu450	0.253724	1.66115e-07	1.20751e-06
Otu070	Otu378	0.253668	0.006	0.0283936
Otu209	Otu331	0.253591	0.002	0.0116299
Otu091	Otu347	0.25337	0.004	0.0206293
Otu117	Otu395	0.253351	0.004	0.0206293
Otu142	Otu436	0.253213	0.002	0.0116299
Otu190	Otu436	0.253095	0.01	0.0419479
Otu118	Otu315	0.253057	0.002	0.0116299
Otu015	Otu374	0.252898	0.006	0.0283936
Otu041	Otu366	0.25256	0.002	0.0116299
Otu067	Otu395	0.252407	0.004	0.0206293
Otu222	Otu408	0.252376	0.002	0.0116299
Otu042	Otu373	0.251794	0.002	0.0116299
Otu157	Otu401	0.251766	1.66115e-07	1.20751e-06
Otu222	Otu359	0.251749	0.002	0.0116299
Otu197	Otu323	0.251711	1.66115e-07	1.20751e-06
Otu142	Otu372	0.251669	1.66115e-07	1.20751e-06
Otu146	Otu390	0.251582	0.002	0.0116299
Otu155	Otu451	0.251334	1.66115e-07	1.20751e-06
Otu154	Otu384	0.251268	1.66115e-07	1.20751e-06
Otu258	Otu315	0.251146	0.006	0.0283936
Otu296	Otu331	0.251026	1.66115e-07	1.20751e-06
Otu043	Otu331	0.251006	0.002	0.0116299
Otu182	Otu340	0.250937	1.66115e-07	1.20751e-06
Otu056	Otu344	0.250896	0.006	0.0283936
Otu081	Otu305	0.250821	1.66115e-07	1.20751e-06
Otu071	Otu378	0.250784	0.004	0.0206293
Otu233	Otu440	0.250685	0.004	0.0206293
Otu086	Otu344	0.250383	0.002	0.0116299
Otu019	Otu346	0.250289	1.66115e-07	1.20751e-06
Otu080	Otu372	0.250269	0.002	0.0116299
Otu086	Otu448	0.250196	0.002	0.0116299
Otu157	Otu407	0.250159	1.66115e-07	1.20751e-06
Otu118	Otu366	0.249916	0.006	0.0283936
Otu095	Otu378	0.249876	0.008	0.0354402
Otu021	Otu396	0.249868	0.006	0.0283936
Otu097	Otu366	0.249832	0.006	0.0283936
Otu249	Otu344	0.249685	0.002	0.0116299
Otu025	Otu436	0.249543	0.008	0.0354402
Otu211	Otu347	0.249435	0.004	0.0206293
Otu015	Otu395	0.249295	0.012	0.0479766
Otu131	Otu374	0.249291	0.012	0.0479766
Otu056	Otu374	0.249222	1.66115e-07	1.20751e-06
Otu239	Otu390	0.249213	0.002	0.0116299
Otu199	Otu419	0.249174	1.66115e-07	1.20751e-06
Otu169	Otu450	0.249091	0.004	0.0206293
Otu207	Otu453	0.249078	1.66115e-07	1.20751e-06
Otu004	Otu307	0.249038	1.66115e-07	1.20751e-06
Otu225	Otu378	0.249037	0.002	0.0116299
Otu207	Otu318	0.249034	1.66115e-07	1.20751e-06
Otu069	Otu436	0.24868	1.66115e-07	1.20751e-06
Otu158	Otu391	0.24861	1.66115e-07	1.20751e-06
Otu207	Otu323	0.248519	0.01	0.0419479
Otu241	Otu315	0.248452	0.002	0.0116299
Otu088	Otu374	0.248228	0.004	0.0206293
Otu084	Otu390	0.248226	0.006	0.0283936
Otu252	Otu436	0.248161	0.006	0.0283936
Otu081	Otu380	0.248016	0.002	0.0116299
Otu094	Otu347	0.247942	0.004	0.0206293
Otu117	Otu366	0.247898	0.006	0.0283936
Otu094	Otu374	0.247857	0.002	0.0116299
Otu157	Otu386	0.247746	1.66115e-07	1.20751e-06
Otu245	Otu347	0.247735	0.004	0.0206293
Otu089	Otu440	0.247724	0.008	0.0354402
Otu061	Otu347	0.247722	0.002	0.0116299
Otu049	Otu395	0.247372	0.002	0.0116299
Otu271	Otu378	0.247328	0.01	0.0419479
Otu160	Otu364	0.246997	0.004	0.0206293
Otu266	Otu396	0.246885	0.008	0.0354402
Otu207	Otu331	0.246845	1.66115e-07	1.20751e-06
Otu218	Otu308	0.246771	1.66115e-07	1.20751e-06
Otu045	Otu410	0.246623	1.66115e-07	1.20751e-06
Otu010	Otu364	0.246485	0.002	0.0116299
Otu218	Otu445	0.246328	0.006	0.0283936
Otu179	Otu436	0.246327	0.004	0.0206293
Otu097	Otu436	0.246319	0.002	0.0116299
Otu231	Otu374	0.246156	0.008	0.0354402
Otu090	Otu315	0.246138	0.008	0.0354402
Otu204	Otu419	0.245964	0.002	0.0116299
Otu131	Otu396	0.24587	0.006	0.0283936
Otu231	Otu342	0.245831	0.004	0.0206293
Otu001	Otu445	0.245684	0.004	0.0206293
Otu076	Otu445	0.245651	1.66115e-07	1.20751e-06
Otu086	Otu315	0.245468	0.008	0.0354402
Otu171	Otu438	0.245445	0.006	0.0283936
Otu153	Otu343	0.24542	1.66115e-07	1.20751e-06
Otu044	Otu359	0.245218	0.002	0.0116299
Otu042	Otu453	0.245167	1.66115e-07	1.20751e-06
Otu263	Otu390	0.245127	0.004	0.0206293
Otu013	Otu445	0.244802	0.002	0.0116299
Otu194	Otu445	0.244664	0.004	0.0206293
Otu128	Otu316	0.244445	0.004	0.0206293
Otu207	Otu408	0.244433	1.66115e-07	1.20751e-06
Otu080	Otu315	0.244399	0.002	0.0116299
Otu109	Otu337	0.24437	0.004	0.0206293
Otu264	Otu436	0.244362	0.002	0.0116299
Otu166	Otu343	0.244073	1.66115e-07	1.20751e-06
Otu225	Otu374	0.244055	0.004	0.0206293
Otu015	Otu440	0.244	0.01	0.0419479
Otu248	Otu347	0.243648	0.002	0.0116299
Otu198	Otu306	0.2436	0.004	0.0206293
Otu273	Otu374	0.243185	0.004	0.0206293
Otu241	Otu366	0.243167	0.008	0.0354402
Otu144	Otu378	0.243089	0.004	0.0206293
Otu097	Otu374	0.24307	0.002	0.0116299
Otu069	Otu440	0.24281	0.002	0.0116299
Otu205	Otu396	0.242681	0.006	0.0283936
Otu222	Otu319	0.242548	0.004	0.0206293
Otu146	Otu440	0.242541	0.006	0.0283936
Otu218	Otu309	0.242386	1.66115e-07	1.20751e-06
Otu243	Otu378	0.242195	0.006	0.0283936
Otu203	Otu306	0.241993	0.006	0.0283936
Otu137	Otu372	0.241947	0.004	0.0206293
Otu217	Otu400	0.241628	0.002	0.0116299
Otu283	Otu307	0.241456	1.66115e-07	1.20751e-06
Otu252	Otu315	0.241404	0.004	0.0206293
Otu148	Otu316	0.241285	1.66115e-07	1.20751e-06
Otu291	Otu340	0.241064	0.008	0.0354402
Otu037	Otu395	0.241038	0.002	0.0116299
Otu214	Otu390	0.24098	0.004	0.0206293
Otu221	Otu432	0.240954	0.002	0.0116299
Otu301	Otu440	0.240787	0.008	0.0354402
Otu256	Otu347	0.240486	0.004	0.0206293
Otu240	Otu374	0.240468	1.66115e-07	1.20751e-06
Otu208	Otu318	0.240435	1.66115e-07	1.20751e-06
Otu223	Otu395	0.240377	0.008	0.0354402
Otu059	Otu395	0.240186	0.008	0.0354402
Otu208	Otu322	0.240162	0.012	0.0479766
Otu208	Otu353	0.240155	1.66115e-07	1.20751e-06
Otu165	Otu384	0.240095	0.004	0.0206293
Otu049	Otu347	0.240055	0.004	0.0206293
Otu261	Otu366	0.239814	0.01	0.0419479
Otu032	Otu374	0.239694	0.004	0.0206293
Otu019	Otu344	0.239564	0.008	0.0354402
Otu034	Otu326	0.23956	0.002	0.0116299
Otu115	Otu328	0.239371	0.006	0.0283936
Otu246	Otu396	0.239328	1.66115e-07	1.20751e-06
Otu173	Otu340	0.239176	0.004	0.0206293
Otu192	Otu453	0.239012	0.002	0.0116299
Otu272	Otu395	0.238748	0.006	0.0283936
Otu161	Otu340	0.238742	0.01	0.0419479
Otu223	Otu436	0.238585	0.004	0.0206293
Otu049	Otu374	0.238578	0.006	0.0283936
Otu234	Otu347	0.238553	0.002	0.0116299
Otu262	Otu390	0.238283	1.66115e-07	1.20751e-06
Otu157	Otu431	0.238202	1.66115e-07	1.20751e-06
Otu142	Otu378	0.238004	0.006	0.0283936
Otu174	Otu331	0.237912	0.006	0.0283936
Otu153	Otu394	0.237906	1.66115e-07	1.20751e-06
Otu115	Otu324	0.237809	0.008	0.0354402
Otu015	Otu346	0.237604	0.004	0.0206293
Otu097	Otu367	0.237562	0.006	0.0283936
Otu218	Otu353	0.237515	1.66115e-07	1.20751e-06
Otu104	Otu440	0.237384	0.01	0.0419479
Otu094	Otu378	0.237323	0.004	0.0206293
Otu051	Otu315	0.237213	0.008	0.0354402
Otu137	Otu436	0.237055	0.004	0.0206293
Otu266	Otu390	0.236772	0.002	0.0116299
Otu239	Otu315	0.236364	0.002	0.0116299
Otu245	Otu333	0.236156	0.004	0.0206293
Otu116	Otu316	0.236131	0.006	0.0283936
Otu225	Otu372	0.235961	1.66115e-07	1.20751e-06
Otu034	Otu307	0.235903	1.66115e-07	1.20751e-06
Otu182	Otu450	0.235883	0.006	0.0283936
Otu157	Otu314	0.23564	1.66115e-07	1.20751e-06
Otu204	Otu445	0.235637	0.008	0.0354402
Otu129	Otu316	0.23561	0.002	0.0116299
Otu240	Otu436	0.235521	0.002	0.0116299
Otu272	Otu374	0.235479	0.01	0.0419479
Otu115	Otu323	0.235471	0.01	0.0419479
Otu044	Otu340	0.235428	0.006	0.0283936
Otu264	Otu395	0.235118	0.01	0.0419479
Otu209	Otu323	0.235112	0.012	0.0479766
Otu256	Otu372	0.235026	0.002	0.0116299
Otu066	Otu315	0.234901	0.012	0.0479766
Otu028	Otu436	0.234851	0.004	0.0206293
Otu256	Otu344	0.234716	0.008	0.0354402
Otu091	Otu378	0.234657	0.004	0.0206293
Otu263	Otu347	0.234529	0.006	0.0283936
Otu257	Otu440	0.23442	0.01	0.0419479
Otu176	Otu374	0.23417	0.004	0.0206293
Otu249	Otu378	0.233962	0.012	0.0479766
Otu228	Otu374	0.233786	1.66115e-07	1.20751e-06
Otu178	Otu376	0.23371	0.002	0.0116299
Otu139	Otu372	0.233352	0.004	0.0206293
Otu077	Otu390	0.233337	0.002	0.0116299
Otu239	Otu395	0.233291	0.008	0.0354402
Otu101	Otu440	0.232963	0.008	0.0354402
Otu114	Otu315	0.232717	0.008	0.0354402
Otu129	Otu306	0.232463	0.006	0.0283936
Otu053	Otu436	0.232446	0.006	0.0283936
Otu196	Otu307	0.232385	0.002	0.0116299
Otu099	Otu344	0.232167	0.002	0.0116299
Otu135	Otu346	0.232163	0.01	0.0419479
Otu032	Otu390	0.232087	0.012	0.0479766
Otu022	Otu344	0.231953	0.006	0.0283936
Otu238	Otu338	0.231853	1.66115e-07	1.20751e-06
Otu154	Otu391	0.231767	0.002	0.0116299
Otu204	Otu322	0.23175	0.01	0.0419479
Otu220	Otu440	0.231379	0.012	0.0479766
Otu153	Otu339	0.231347	1.66115e-07	1.20751e-06
Otu213	Otu351	0.231286	0.008	0.0354402
Otu211	Otu372	0.231279	0.004	0.0206293
Otu045	Otu391	0.231265	0.002	0.0116299
Otu215	Otu374	0.231119	0.01	0.0419479
Otu042	Otu386	0.231044	0.002	0.0116299
Otu114	Otu396	0.230959	0.004	0.0206293
Otu278	Otu307	0.23076	0.002	0.0116299
Otu151	Otu396	0.230759	0.006	0.0283936
Otu297	Otu436	0.230748	0.004	0.0206293
Otu280	Otu419	0.23055	0.004	0.0206293
Otu163	Otu359	0.230474	0.004	0.0206293
Otu280	Otu328	0.230451	0.012	0.0479766
Otu165	Otu334	0.230193	1.66115e-07	1.20751e-06
Otu163	Otu450	0.230129	0.01	0.0419479
Otu242	Otu436	0.230047	0.004	0.0206293
Otu156	Otu360	0.229997	0.004	0.0206293
Otu266	Otu346	0.229647	0.006	0.0283936
Otu198	Otu307	0.229482	0.002	0.0116299
Otu042	Otu332	0.229297	0.004	0.0206293
Otu032	Otu396	0.229171	0.01	0.0419479
Otu127	Otu359	0.228856	0.012	0.0479766
Otu001	Otu307	0.22882	0.002	0.0116299
Otu276	Otu366	0.228817	0.008	0.0354402
Otu019	Otu315	0.228811	0.004	0.0206293
Otu093	Otu390	0.228705	0.006	0.0283936
Otu261	Otu390	0.22869	0.006	0.0283936
Otu016	Otu346	0.228622	0.012	0.0479766
Otu248	Otu395	0.228613	0.002	0.0116299
Otu045	Otu340	0.22859	0.004	0.0206293
Otu223	Otu390	0.22825	0.008	0.0354402
Otu016	Otu372	0.228239	0.002	0.0116299
Otu094	Otu396	0.228164	0.006	0.0283936
Otu115	Otu453	0.228158	1.66115e-07	1.20751e-06
Otu201	Otu396	0.228049	0.004	0.0206293
Otu279	Otu357	0.227931	0.002	0.0116299
Otu202	Otu322	0.227691	0.004	0.0206293
Otu181	Otu419	0.227671	0.004	0.0206293
Otu247	Otu395	0.227587	0.002	0.0116299
Otu157	Otu429	0.22757	1.66115e-07	1.20751e-06
Otu201	Otu366	0.227199	0.006	0.0283936
Otu184	Otu328	0.227043	0.01	0.0419479
Otu108	Otu396	0.226908	0.012	0.0479766
Otu292	Otu440	0.226896	0.01	0.0419479
Otu060	Otu346	0.226877	0.006	0.0283936
Otu087	Otu333	0.226657	0.01	0.0419479
Otu226	Otu372	0.226626	0.004	0.0206293
Otu093	Otu374	0.226564	0.008	0.0354402
Otu196	Otu316	0.22635	0.008	0.0354402
Otu280	Otu323	0.225865	0.008	0.0354402
Otu301	Otu378	0.225663	0.01	0.0419479
Otu115	Otu442	0.225423	0.01	0.0419479
Otu072	Otu374	0.225031	0.012	0.0479766
Otu218	Otu358	0.224887	1.66115e-07	1.20751e-06
Otu010	Otu367	0.224881	0.006	0.0283936
Otu224	Otu337	0.224802	0.012	0.0479766
Otu281	Otu331	0.224795	0.004	0.0206293
Otu270	Otu390	0.224682	0.012	0.0479766
Otu114	Otu374	0.224681	0.004	0.0206293
Otu262	Otu436	0.224675	0.004	0.0206293
Otu098	Otu378	0.224457	0.008	0.0354402
Otu227	Otu436	0.224267	0.002	0.0116299
Otu266	Otu367	0.224112	0.012	0.0479766
Otu054	Otu315	0.224097	0.012	0.0479766
Otu165	Otu391	0.223841	0.006	0.0283936
Otu017	Otu342	0.223664	0.01	0.0419479
Otu248	Otu390	0.223614	1.66115e-07	1.20751e-06
Otu226	Otu347	0.223591	0.01	0.0419479
Otu208	Otu451	0.223538	0.012	0.0479766
Otu261	Otu374	0.223456	0.006	0.0283936
Otu106	Otu347	0.223372	0.012	0.0479766
Otu167	Otu429	0.223348	1.66115e-07	1.20751e-06
Otu217	Otu323	0.22302	0.004	0.0206293
Otu063	Otu331	0.222877	0.008	0.0354402
Otu196	Otu445	0.222787	0.006	0.0283936
Otu103	Otu390	0.222756	0.006	0.0283936
Otu156	Otu339	0.222714	0.004	0.0206293
Otu196	Otu337	0.222641	0.008	0.0354402
Otu157	Otu358	0.222533	1.66115e-07	1.20751e-06
Otu239	Otu347	0.222412	0.008	0.0354402
Otu082	Otu396	0.222067	0.006	0.0283936
Otu061	Otu396	0.221761	0.004	0.0206293
Otu026	Otu346	0.221759	0.006	0.0283936
Otu196	Otu322	0.22147	0.008	0.0354402
Otu201	Otu408	0.221432	1.66115e-07	1.20751e-06
Otu271	Otu315	0.221153	0.012	0.0479766
Otu272	Otu436	0.221121	0.004	0.0206293
Otu018	Otu326	0.221095	1.66115e-07	1.20751e-06
Otu240	Otu396	0.221035	0.008	0.0354402
Otu277	Otu336	0.220971	0.008	0.0354402
Otu045	Otu395	0.220867	0.002	0.0116299
Otu042	Otu325	0.220566	0.012	0.0479766
Otu087	Otu390	0.22053	0.008	0.0354402
Otu218	Otu449	0.220443	0.002	0.0116299
Otu173	Otu397	0.220415	1.66115e-07	1.20751e-06
Otu212	Otu374	0.220364	0.004	0.0206293
Otu241	Otu346	0.220306	0.004	0.0206293
Otu218	Otu385	0.220215	1.66115e-07	1.20751e-06
Otu218	Otu453	0.220139	0.002	0.0116299
Otu296	Otu336	0.220107	0.006	0.0283936
Otu042	Otu442	0.220054	0.002	0.0116299
Otu009	Otu367	0.219988	0.012	0.0479766
Otu022	Otu396	0.219947	0.01	0.0419479
Otu028	Otu390	0.219918	0.002	0.0116299
Otu173	Otu396	0.219894	0.008	0.0354402
Otu071	Otu344	0.219893	0.012	0.0479766
Otu039	Otu322	0.219744	0.008	0.0354402
Otu231	Otu366	0.21973	0.008	0.0354402
Otu221	Otu376	0.219589	0.01	0.0419479
Otu157	Otu311	0.219507	1.66115e-07	1.20751e-06
Otu230	Otu347	0.219491	0.006	0.0283936
Otu156	Otu451	0.219482	0.008	0.0354402
Otu229	Otu439	0.219422	1.66115e-07	1.20751e-06
Otu115	Otu359	0.21911	0.006	0.0283936
Otu261	Otu395	0.21887	0.008	0.0354402
Otu154	Otu438	0.218755	0.012	0.0479766
Otu208	Otu311	0.218551	1.66115e-07	1.20751e-06
Otu060	Otu378	0.218417	0.006	0.0283936
Otu276	Otu347	0.218393	0.012	0.0479766
Otu202	Otu316	0.218375	0.004	0.0206293
Otu066	Otu436	0.218145	0.012	0.0479766
Otu081	Otu391	0.217982	0.002	0.0116299
Otu153	Otu335	0.217923	0.002	0.0116299
Otu229	Otu384	0.217917	0.002	0.0116299
Otu038	Otu322	0.217633	0.002	0.0116299
Otu225	Otu379	0.217289	0.002	0.0116299
Otu069	Otu395	0.21707	0.006	0.0283936
Otu137	Otu380	0.216958	0.01	0.0419479
Otu205	Otu390	0.216789	0.01	0.0419479
Otu157	Otu427	0.216635	1.66115e-07	1.20751e-06
Otu026	Otu389	0.216568	1.66115e-07	1.20751e-06
Otu081	Otu372	0.216566	0.006	0.0283936
Otu104	Otu390	0.216531	0.01	0.0419479
Otu181	Otu306	0.21651	0.01	0.0419479
Otu208	Otu448	0.216501	0.004	0.0206293
Otu218	Otu443	0.21645	0.002	0.0116299
Otu263	Otu315	0.216257	0.01	0.0419479
Otu042	Otu360	0.216198	0.01	0.0419479
Otu286	Otu390	0.216151	0.006	0.0283936
Otu152	Otu307	0.216051	0.002	0.0116299
Otu102	Otu436	0.215993	0.01	0.0419479
Otu020	Otu436	0.215904	0.006	0.0283936
Otu035	Otu343	0.215802	0.002	0.0116299
Otu155	Otu370	0.215777	0.008	0.0354402
Otu258	Otu396	0.215567	0.004	0.0206293
Otu218	Otu316	0.215499	0.012	0.0479766
Otu196	Otu453	0.215447	1.66115e-07	1.20751e-06
Otu294	Otu369	0.215367	1.66115e-07	1.20751e-06
Otu253	Otu396	0.215348	0.006	0.0283936
Otu094	Otu372	0.215247	0.006	0.0283936
Otu135	Otu331	0.215096	0.01	0.0419479
Otu153	Otu430	0.215046	1.66115e-07	1.20751e-06
Otu039	Otu307	0.214729	0.004	0.0206293
Otu153	Otu409	0.214464	0.006	0.0283936
Otu078	Otu436	0.214185	0.008	0.0354402
Otu105	Otu344	0.213981	0.008	0.0354402
Otu099	Otu372	0.21395	0.006	0.0283936
Otu167	Otu355	0.213911	0.004	0.0206293
Otu215	Otu372	0.21382	0.004	0.0206293
Otu102	Otu396	0.213773	0.012	0.0479766
Otu218	Otu402	0.213759	1.66115e-07	1.20751e-06
Otu196	Otu323	0.213733	0.01	0.0419479
Otu218	Otu394	0.213521	1.66115e-07	1.20751e-06
Otu280	Otu400	0.213495	0.01	0.0419479
Otu096	Otu390	0.213495	0.012	0.0479766
Otu128	Otu419	0.213346	0.002	0.0116299
Otu164	Otu384	0.213206	0.01	0.0419479
Otu293	Otu340	0.213181	0.008	0.0354402
Otu187	Otu447	0.212971	0.01	0.0419479
Otu184	Otu419	0.212545	0.012	0.0479766
Otu218	Otu350	0.212383	1.66115e-07	1.20751e-06
Otu046	Otu392	0.212275	0.006	0.0283936
Otu218	Otu435	0.212226	1.66115e-07	1.20751e-06
Otu008	Otu346	0.212197	0.004	0.0206293
Otu281	Otu307	0.212023	1.66115e-07	1.20751e-06
Otu050	Otu411	0.211972	0.008	0.0354402
Otu185	Otu343	0.211954	0.01	0.0419479
Otu220	Otu346	0.211934	0.012	0.0479766
Otu153	Otu418	0.211877	1.66115e-07	1.20751e-06
Otu021	Otu436	0.211775	0.012	0.0479766
Otu229	Otu391	0.211766	0.004	0.0206293
Otu157	Otu449	0.211758	1.66115e-07	1.20751e-06
Otu143	Otu436	0.211758	0.004	0.0206293
Otu173	Otu390	0.211544	0.008	0.0354402
Otu207	Otu369	0.211463	0.002	0.0116299
Otu157	Otu404	0.21145	1.66115e-07	1.20751e-06
Otu018	Otu312	0.211436	1.66115e-07	1.20751e-06
Otu265	Otu440	0.211367	0.004	0.0206293
Otu054	Otu390	0.211316	0.012	0.0479766
Otu132	Otu331	0.211159	0.004	0.0206293
Otu173	Otu391	0.211018	0.008	0.0354402
Otu157	Otu312	0.211017	1.66115e-07	1.20751e-06
Otu157	Otu412	0.210998	0.002	0.0116299
Otu218	Otu416	0.210946	1.66115e-07	1.20751e-06
Otu043	Otu445	0.210806	0.006	0.0283936
Otu042	Otu341	0.210619	0.01	0.0419479
Otu018	Otu311	0.210378	1.66115e-07	1.20751e-06
Otu208	Otu307	0.210364	0.002	0.0116299
Otu054	Otu396	0.210156	0.012	0.0479766
Otu144	Otu436	0.210128	0.006	0.0283936
Otu275	Otu419	0.210111	0.008	0.0354402
Otu157	Otu304	0.209981	1.66115e-07	1.20751e-06
Otu302	Otu391	0.209901	0.002	0.0116299
Otu195	Otu307	0.209836	0.008	0.0354402
Otu270	Otu347	0.209782	0.01	0.0419479
Otu253	Otu440	0.209773	0.008	0.0354402
Otu013	Otu370	0.209709	0.01	0.0419479
Otu018	Otu388	0.209565	1.66115e-07	1.20751e-06
Otu118	Otu395	0.209557	0.008	0.0354402
Otu276	Otu396	0.209453	0.01	0.0419479
Otu054	Otu378	0.209375	0.01	0.0419479
Otu192	Otu413	0.209281	1.66115e-07	1.20751e-06
Otu102	Otu347	0.209094	0.012	0.0479766
Otu207	Otu400	0.208939	0.008	0.0354402
Otu208	Otu339	0.208823	0.01	0.0419479
Otu280	Otu324	0.208792	0.01	0.0419479
Otu048	Otu347	0.208789	0.002	0.0116299
Otu271	Otu390	0.208655	0.012	0.0479766
Otu153	Otu360	0.208593	0.008	0.0354402
Otu289	Otu331	0.208496	0.006	0.0283936
Otu102	Otu410	0.208489	0.002	0.0116299
Otu021	Otu379	0.20842	0.006	0.0283936
Otu045	Otu306	0.207692	0.012	0.0479766
Otu270	Otu366	0.207594	0.012	0.0479766
Otu010	Otu328	0.207558	0.012	0.0479766
Otu080	Otu333	0.207519	0.006	0.0283936
Otu176	Otu366	0.207519	0.012	0.0479766
Otu105	Otu379	0.207247	0.006	0.0283936
Otu222	Otu429	0.207186	1.66115e-07	1.20751e-06
Otu022	Otu436	0.206993	0.01	0.0419479
Otu183	Otu342	0.206813	0.012	0.0479766
Otu157	Otu437	0.20679	1.66115e-07	1.20751e-06
Otu276	Otu390	0.206716	0.008	0.0354402
Otu222	Otu449	0.20666	1.66115e-07	1.20751e-06
Otu135	Otu408	0.206605	0.012	0.0479766
Otu054	Otu436	0.20623	0.01	0.0419479
Otu278	Otu331	0.205799	0.01	0.0419479
Otu065	Otu323	0.205784	0.012	0.0479766
Otu248	Otu378	0.205648	0.01	0.0419479
Otu208	Otu416	0.205635	1.66115e-07	1.20751e-06
Otu019	Otu378	0.205579	0.01	0.0419479
Otu076	Otu318	0.205495	1.66115e-07	1.20751e-06
Otu195	Otu415	0.205357	0.004	0.0206293
Otu049	Otu396	0.204947	0.01	0.0419479
Otu270	Otu374	0.204841	0.006	0.0283936
Otu153	Otu427	0.204776	1.66115e-07	1.20751e-06
Otu080	Otu392	0.204727	0.002	0.0116299
Otu247	Otu346	0.20466	0.012	0.0479766
Otu197	Otu453	0.204329	1.66115e-07	1.20751e-06
Otu255	Otu436	0.204032	0.002	0.0116299
Otu296	Otu419	0.203861	0.008	0.0354402
Otu208	Otu413	0.203703	1.66115e-07	1.20751e-06
Otu247	Otu374	0.203677	0.01	0.0419479
Otu222	Otu421	0.203675	1.66115e-07	1.20751e-06
Otu152	Otu419	0.203658	0.01	0.0419479
Otu277	Otu307	0.203645	0.006	0.0283936
Otu023	Otu316	0.203356	0.006	0.0283936
Otu267	Otu380	0.203303	0.01	0.0419479
Otu231	Otu372	0.203267	0.006	0.0283936
Otu232	Otu396	0.203227	0.006	0.0283936
Otu282	Otu307	0.203199	0.002	0.0116299
Otu110	Otu369	0.203061	1.66115e-07	1.20751e-06
Otu230	Otu378	0.203026	0.012	0.0479766
Otu127	Otu331	0.202886	0.012	0.0479766
Otu001	Otu419	0.202883	0.008	0.0354402
Otu278	Otu400	0.202731	0.008	0.0354402
Otu047	Otu331	0.202712	0.006	0.0283936
Otu253	Otu347	0.202655	0.006	0.0283936
Otu208	Otu326	0.202625	0.01	0.0419479
Otu049	Otu390	0.202547	0.008	0.0354402
Otu143	Otu374	0.202508	0.012	0.0479766
Otu011	Otu398	0.202169	1.66115e-07	1.20751e-06
Otu174	Otu439	0.202126	0.002	0.0116299
Otu018	Otu369	0.20205	1.66115e-07	1.20751e-06
Otu246	Otu374	0.202035	0.012	0.0479766
Otu218	Otu330	0.202005	0.008	0.0354402
Otu208	Otu425	0.201708	0.002	0.0116299
Otu034	Otu316	0.201564	0.006	0.0283936
Otu207	Otu312	0.201563	1.66115e-07	1.20751e-06
Otu270	Otu396	0.201377	0.008	0.0354402
Otu007	Otu445	0.2012	0.012	0.0479766
Otu171	Otu384	0.200981	0.008	0.0354402
Otu207	Otu307	0.200873	0.006	0.0283936
Otu296	Otu324	0.200547	0.008	0.0354402
Otu157	Otu385	0.200538	1.66115e-07	1.20751e-06
Otu218	Otu356	0.200462	0.004	0.0206293
Otu074	Otu391	0.200272	0.01	0.0419479
Otu163	Otu384	0.200232	0.01	0.0419479
Otu171	Otu439	0.199875	0.002	0.0116299
Otu112	Otu369	0.199855	1.66115e-07	1.20751e-06
Otu165	Otu416	0.19975	1.66115e-07	1.20751e-06
Otu115	Otu330	0.199505	0.004	0.0206293
Otu153	Otu340	0.199357	0.008	0.0354402
Otu218	Otu433	0.199331	0.002	0.0116299
Otu199	Otu307	0.199033	0.006	0.0283936
Otu246	Otu366	0.199012	0.01	0.0419479
Otu259	Otu372	0.198991	0.012	0.0479766
Otu182	Otu384	0.198976	0.012	0.0479766
Otu153	Otu308	0.198938	1.66115e-07	1.20751e-06
Otu207	Otu309	0.198879	1.66115e-07	1.20751e-06
Otu039	Otu326	0.198798	1.66115e-07	1.20751e-06
Otu144	Otu379	0.19868	0.004	0.0206293
Otu035	Otu339	0.198361	0.002	0.0116299
Otu192	Otu369	0.198344	0.002	0.0116299
Otu288	Otu368	0.198182	0.008	0.0354402
Otu152	Otu316	0.198034	0.004	0.0206293
Otu076	Otu437	0.198027	1.66115e-07	1.20751e-06
Otu167	Otu437	0.197992	0.006	0.0283936
Otu157	Otu415	0.197974	1.66115e-07	1.20751e-06
Otu153	Otu449	0.197972	1.66115e-07	1.20751e-06
Otu218	Otu421	0.197968	1.66115e-07	1.20751e-06
Otu115	Otu370	0.197876	0.01	0.0419479
Otu218	Otu398	0.197855	1.66115e-07	1.20751e-06
Otu019	Otu436	0.19779	0.012	0.0479766
Otu157	Otu421	0.197727	1.66115e-07	1.20751e-06
Otu218	Otu447	0.197707	0.012	0.0479766
Otu222	Otu352	0.197426	0.004	0.0206293
Otu219	Otu331	0.197332	0.012	0.0479766
Otu119	Otu436	0.19714	0.008	0.0354402
Otu238	Otu436	0.197075	0.01	0.0419479
Otu036	Otu316	0.196908	0.002	0.0116299
Otu165	Otu414	0.1969	1.66115e-07	1.20751e-06
Otu003	Otu331	0.196875	1.66115e-07	1.20751e-06
Otu181	Otu453	0.196713	0.002	0.0116299
Otu065	Otu419	0.196693	0.002	0.0116299
Otu278	Otu453	0.196164	1.66115e-07	1.20751e-06
Otu247	Otu436	0.195925	0.012	0.0479766
Otu103	Otu372	0.195858	0.004	0.0206293
Otu252	Otu372	0.195817	0.012	0.0479766
Otu183	Otu321	0.195793	0.004	0.0206293
Otu153	Otu404	0.195655	0.004	0.0206293
Otu076	Otu317	0.195573	1.66115e-07	1.20751e-06
Otu109	Otu413	0.195552	1.66115e-07	1.20751e-06
Otu030	Otu419	0.195454	0.006	0.0283936
Otu294	Otu388	0.195211	1.66115e-07	1.20751e-06
Otu157	Otu335	0.19485	1.66115e-07	1.20751e-06
Otu208	Otu330	0.194773	0.004	0.0206293
Otu292	Otu315	0.194669	0.008	0.0354402
Otu018	Otu418	0.194653	1.66115e-07	1.20751e-06
Otu153	Otu312	0.194638	1.66115e-07	1.20751e-06
Otu192	Otu328	0.194326	0.006	0.0283936
Otu059	Otu372	0.194156	0.008	0.0354402
Otu165	Otu430	0.194142	0.002	0.0116299
Otu295	Otu418	0.194026	1.66115e-07	1.20751e-06
Otu092	Otu366	0.194013	0.012	0.0479766
Otu018	Otu309	0.193686	1.66115e-07	1.20751e-06
Otu269	Otu380	0.193602	0.008	0.0354402
Otu264	Otu372	0.193568	0.008	0.0354402
Otu290	Otu331	0.193552	0.012	0.0479766
Otu207	Otu356	0.193438	1.66115e-07	1.20751e-06
Otu170	Otu434	0.193404	0.01	0.0419479
Otu204	Otu307	0.193381	0.008	0.0354402
Otu263	Otu344	0.193054	0.012	0.0479766
Otu044	Otu411	0.192902	0.012	0.0479766
Otu157	Otu414	0.192806	1.66115e-07	1.20751e-06
Otu004	Otu453	0.192677	0.002	0.0116299
Otu208	Otu433	0.192676	0.004	0.0206293
Otu090	Otu395	0.192646	0.012	0.0479766
Otu099	Otu379	0.19252	0.008	0.0354402
Otu145	Otu305	0.192506	0.002	0.0116299
Otu018	Otu368	0.192485	0.008	0.0354402
Otu218	Otu407	0.192193	0.002	0.0116299
Otu157	Otu425	0.192145	0.002	0.0116299
Otu018	Otu314	0.191686	1.66115e-07	1.20751e-06
Otu077	Otu436	0.191122	0.012	0.0479766
Otu208	Otu356	0.19105	1.66115e-07	1.20751e-06
Otu207	Otu421	0.190933	1.66115e-07	1.20751e-06
Otu299	Otu424	0.190774	1.66115e-07	1.20751e-06
Otu012	Otu353	0.190312	0.002	0.0116299
Otu218	Otu413	0.19027	1.66115e-07	1.20751e-06
Otu042	Otu437	0.19015	1.66115e-07	1.20751e-06
Otu275	Otu309	0.19002	1.66115e-07	1.20751e-06
Otu032	Otu391	0.189897	0.012	0.0479766
Otu035	Otu362	0.189847	0.006	0.0283936
Otu180	Otu392	0.189583	0.008	0.0354402
Otu157	Otu430	0.189376	0.002	0.0116299
Otu296	Otu316	0.189246	0.004	0.0206293
Otu059	Otu344	0.189117	0.01	0.0419479
Otu283	Otu441	0.188719	1.66115e-07	1.20751e-06
Otu167	Otu404	0.188683	0.01	0.0419479
Otu218	Otu345	0.188594	1.66115e-07	1.20751e-06
Otu186	Otu343	0.188541	0.01	0.0419479
Otu280	Otu307	0.188503	0.006	0.0283936
Otu222	Otu345	0.188294	1.66115e-07	1.20751e-06
Otu224	Otu453	0.188144	0.012	0.0479766
Otu218	Otu329	0.188116	0.006	0.0283936
Otu207	Otu394	0.187923	0.002	0.0116299
Otu218	Otu348	0.187829	0.008	0.0354402
Otu157	Otu402	0.187435	1.66115e-07	1.20751e-06
Otu222	Otu386	0.186818	0.006	0.0283936
Otu167	Otu407	0.186486	1.66115e-07	1.20751e-06
Otu042	Otu404	0.186402	0.002	0.0116299
Otu042	Otu433	0.186306	0.008	0.0354402
Otu116	Otu307	0.186226	0.008	0.0354402
Otu119	Otu396	0.186193	0.012	0.0479766
Otu028	Otu379	0.186042	0.012	0.0479766
Otu267	Otu372	0.185862	0.006	0.0283936
Otu253	Otu315	0.18564	0.012	0.0479766
Otu018	Otu449	0.185423	1.66115e-07	1.20751e-06
Otu195	Otu362	0.18505	0.008	0.0354402
Otu270	Otu379	0.18503	0.004	0.0206293
Otu153	Otu321	0.184934	0.006	0.0283936
Otu222	Otu335	0.184851	0.008	0.0354402
Otu303	Otu409	0.18472	0.012	0.0479766
Otu192	Otu353	0.18461	0.006	0.0283936
Otu165	Otu309	0.184202	1.66115e-07	1.20751e-06
Otu113	Otu307	0.184194	0.002	0.0116299
Otu255	Otu372	0.184187	0.012	0.0479766
Otu051	Otu436	0.184126	0.012	0.0479766
Otu289	Otu419	0.183969	0.012	0.0479766
Otu275	Otu418	0.18383	0.002	0.0116299
Otu176	Otu397	0.183822	0.01	0.0419479
Otu294	Otu311	0.183665	1.66115e-07	1.20751e-06
Otu288	Otu321	0.183329	1.66115e-07	1.20751e-06
Otu300	Otu346	0.183313	0.008	0.0354402
Otu267	Otu390	0.183139	0.01	0.0419479
Otu115	Otu353	0.183069	1.66115e-07	1.20751e-06
Otu224	Otu353	0.182835	0.006	0.0283936
Otu018	Otu421	0.182812	1.66115e-07	1.20751e-06
Otu076	Otu311	0.182449	1.66115e-07	1.20751e-06
Otu157	Otu417	0.182443	1.66115e-07	1.20751e-06
Otu302	Otu439	0.182173	0.004	0.0206293
Otu300	Otu331	0.181914	0.01	0.0419479
Otu145	Otu372	0.181868	0.004	0.0206293
Otu294	Otu308	0.181349	1.66115e-07	1.20751e-06
Otu295	Otu389	0.181236	0.004	0.0206293
Otu218	Otu304	0.18116	0.006	0.0283936
Otu218	Otu429	0.181142	1.66115e-07	1.20751e-06
Otu105	Otu409	0.181074	0.008	0.0354402
Otu285	Otu447	0.180929	0.002	0.0116299
Otu157	Otu389	0.180855	0.002	0.0116299
Otu192	Otu385	0.180716	0.002	0.0116299
Otu170	Otu355	0.180622	0.012	0.0479766
Otu179	Otu379	0.180441	0.01	0.0419479
Otu222	Otu388	0.180228	1.66115e-07	1.20751e-06
Otu150	Otu421	0.180213	1.66115e-07	1.20751e-06
Otu218	Otu427	0.180194	0.004	0.0206293
Otu102	Otu372	0.180019	0.012	0.0479766
Otu222	Otu406	0.179941	0.012	0.0479766
Otu285	Otu334	0.179929	1.66115e-07	1.20751e-06
Otu076	Otu407	0.179845	1.66115e-07	1.20751e-06
Otu157	Otu318	0.179808	1.66115e-07	1.20751e-06
Otu208	Otu385	0.179762	0.002	0.0116299
Otu081	Otu432	0.179678	0.002	0.0116299
Otu244	Otu327	0.179606	0.012	0.0479766
Otu076	Otu310	0.179001	1.66115e-07	1.20751e-06
Otu195	Otu443	0.17838	0.008	0.0354402
Otu283	Otu317	0.178335	1.66115e-07	1.20751e-06
Otu222	Otu430	0.178143	0.004	0.0206293
Otu300	Otu434	0.178125	0.01	0.0419479
Otu153	Otu429	0.178084	1.66115e-07	1.20751e-06
Otu018	Otu386	0.177887	1.66115e-07	1.20751e-06
Otu157	Otu356	0.177815	1.66115e-07	1.20751e-06
Otu208	Otu412	0.177612	0.006	0.0283936
Otu207	Otu425	0.177551	0.006	0.0283936
Otu178	Otu343	0.177173	0.012	0.0479766
Otu153	Otu416	0.177032	1.66115e-07	1.20751e-06
Otu001	Otu453	0.177031	0.004	0.0206293
Otu031	Otu343	0.176845	1.66115e-07	1.20751e-06
Otu207	Otu326	0.176744	0.01	0.0419479
Otu167	Otu389	0.176512	0.002	0.0116299
Otu006	Otu443	0.176293	0.006	0.0283936
Otu283	Otu401	0.176034	1.66115e-07	1.20751e-06
Otu291	Otu394	0.175955	0.002	0.0116299
Otu153	Otu362	0.175875	0.01	0.0419479
Otu113	Otu368	0.175864	0.002	0.0116299
Otu300	Otu423	0.175697	0.01	0.0419479
Otu218	Otu414	0.175315	1.66115e-07	1.20751e-06
Otu153	Otu314	0.175163	1.66115e-07	1.20751e-06
Otu065	Otu307	0.175133	0.012	0.0479766
Otu221	Otu339	0.17489	0.008	0.0354402
Otu222	Otu353	0.174877	0.004	0.0206293
Otu157	Otu403	0.174867	0.004	0.0206293
Otu011	Otu449	0.174854	0.004	0.0206293
Otu157	Otu310	0.174836	1.66115e-07	1.20751e-06
Otu012	Otu305	0.174833	0.008	0.0354402
Otu076	Otu314	0.174493	1.66115e-07	1.20751e-06
Otu042	Otu385	0.174327	0.008	0.0354402
Otu218	Otu412	0.174297	0.008	0.0354402
Otu222	Otu358	0.17428	1.66115e-07	1.20751e-06
Otu075	Otu317	0.173949	0.006	0.0283936
Otu218	Otu418	0.173832	0.002	0.0116299
Otu222	Otu318	0.173713	0.002	0.0116299
Otu194	Otu433	0.173371	0.012	0.0479766
Otu076	Otu319	0.173212	0.012	0.0479766
Otu157	Otu353	0.173156	1.66115e-07	1.20751e-06
Otu042	Otu429	0.173146	0.002	0.0116299
Otu154	Otu421	0.172955	1.66115e-07	1.20751e-06
Otu154	Otu326	0.172764	0.008	0.0354402
Otu157	Otu426	0.172698	0.002	0.0116299
Otu208	Otu312	0.172505	1.66115e-07	1.20751e-06
Otu113	Otu386	0.172364	0.006	0.0283936
Otu207	Otu362	0.171721	0.008	0.0354402
Otu275	Otu402	0.17134	1.66115e-07	1.20751e-06
Otu153	Otu398	0.17106	0.002	0.0116299
Otu294	Otu431	0.171019	1.66115e-07	1.20751e-06
Otu207	Otu402	0.170918	1.66115e-07	1.20751e-06
Otu018	Otu318	0.170578	1.66115e-07	1.20751e-06
Otu172	Otu381	0.170557	0.01	0.0419479
Otu177	Otu430	0.170494	0.004	0.0206293
Otu148	Otu350	0.170199	1.66115e-07	1.20751e-06
Otu029	Otu304	0.170016	1.66115e-07	1.20751e-06
Otu218	Otu310	0.169942	0.01	0.0419479
Otu140	Otu400	0.169928	0.008	0.0354402
Otu147	Otu307	0.169821	0.012	0.0479766
Otu302	Otu304	0.1695	0.006	0.0283936
Otu018	Otu408	0.169485	0.01	0.0419479
Otu167	Otu430	0.169264	0.006	0.0283936
Otu208	Otu335	0.169026	0.004	0.0206293
Otu208	Otu329	0.168889	0.008	0.0354402
Otu171	Otu435	0.168835	1.66115e-07	1.20751e-06
Otu165	Otu335	0.168642	0.002	0.0116299
Otu284	Otu447	0.168485	0.002	0.0116299
Otu029	Otu380	0.16827	0.012	0.0479766
Otu289	Otu356	0.168171	0.004	0.0206293
Otu167	Otu388	0.168117	1.66115e-07	1.20751e-06
Otu254	Otu411	0.168075	0.004	0.0206293
Otu157	Otu423	0.167975	0.01	0.0419479
Otu222	Otu412	0.167705	0.012	0.0479766
Otu299	Otu321	0.167574	0.01	0.0419479
Otu288	Otu409	0.167569	0.012	0.0479766
Otu192	Otu437	0.167525	0.006	0.0283936
Otu165	Otu314	0.167415	1.66115e-07	1.20751e-06
Otu018	Otu404	0.167404	0.004	0.0206293
Otu006	Otu345	0.167343	0.004	0.0206293
Otu036	Otu350	0.167252	0.006	0.0283936
Otu208	Otu407	0.166618	0.006	0.0283936
Otu194	Otu310	0.166279	0.006	0.0283936
Otu174	Otu321	0.166238	0.012	0.0479766
Otu294	Otu435	0.165949	1.66115e-07	1.20751e-06
Otu302	Otu401	0.16587	1.66115e-07	1.20751e-06
Otu185	Otu362	0.16587	0.008	0.0354402
Otu006	Otu329	0.165788	0.012	0.0479766
Otu153	Otu345	0.1657	1.66115e-07	1.20751e-06
Otu076	Otu443	0.165323	1.66115e-07	1.20751e-06
Otu165	Otu407	0.165246	0.002	0.0116299
Otu153	Otu350	0.165198	0.01	0.0419479
Otu120	Otu348	0.165141	0.004	0.0206293
Otu283	Otu329	0.164932	0.004	0.0206293
Otu165	Otu401	0.16488	0.002	0.0116299
Otu038	Otu307	0.164472	0.01	0.0419479
Otu160	Otu321	0.164441	0.012	0.0479766
Otu207	Otu311	0.164386	1.66115e-07	1.20751e-06
Otu167	Otu394	0.163912	1.66115e-07	1.20751e-06
Otu302	Otu394	0.163672	0.002	0.0116299
Otu207	Otu314	0.163665	1.66115e-07	1.20751e-06
Otu154	Otu394	0.163604	1.66115e-07	1.20751e-06
Otu294	Otu401	0.163506	0.002	0.0116299
Otu294	Otu313	0.163159	1.66115e-07	1.20751e-06
Otu141	Otu405	0.163117	0.008	0.0354402
Otu076	Otu404	0.163098	0.002	0.0116299
Otu300	Otu409	0.163021	0.004	0.0206293
Otu198	Otu400	0.162896	0.008	0.0354402
Otu165	Otu421	0.162887	1.66115e-07	1.20751e-06
Otu244	Otu409	0.162757	0.006	0.0283936
Otu157	Otu352	0.162706	0.004	0.0206293
Otu164	Otu409	0.162272	0.012	0.0479766
Otu026	Otu414	0.162166	1.66115e-07	1.20751e-06
Otu150	Otu388	0.161932	1.66115e-07	1.20751e-06
Otu208	Otu309	0.161873	1.66115e-07	1.20751e-06
Otu076	Otu385	0.161845	1.66115e-07	1.20751e-06
Otu192	Otu318	0.161655	0.002	0.0116299
Otu006	Otu398	0.16155	1.66115e-07	1.20751e-06
Otu036	Otu422	0.161547	0.004	0.0206293
Otu076	Otu308	0.1614	1.66115e-07	1.20751e-06
Otu026	Otu394	0.161308	1.66115e-07	1.20751e-06
Otu157	Otu330	0.161219	0.01	0.0419479
Otu288	Otu343	0.161195	0.008	0.0354402
Otu076	Otu328	0.161034	0.012	0.0479766
Otu148	Otu412	0.160772	0.002	0.0116299
Otu076	Otu392	0.160709	0.008	0.0354402
Otu208	Otu314	0.160291	1.66115e-07	1.20751e-06
Otu165	Otu427	0.159969	1.66115e-07	1.20751e-06
Otu201	Otu321	0.159482	0.012	0.0479766
Otu153	Otu309	0.159217	1.66115e-07	1.20751e-06
Otu122	Otu439	0.15889	0.012	0.0479766
Otu165	Otu389	0.158855	0.012	0.0479766
Otu018	Otu308	0.158691	1.66115e-07	1.20751e-06
Otu165	Otu433	0.158588	0.008	0.0354402
Otu283	Otu447	0.158392	0.008	0.0354402
Otu294	Otu416	0.158326	1.66115e-07	1.20751e-06
Otu157	Otu334	0.158225	0.004	0.0206293
Otu153	Otu414	0.158017	1.66115e-07	1.20751e-06
Otu207	Otu435	0.157762	1.66115e-07	1.20751e-06
Otu194	Otu415	0.157608	0.004	0.0206293
Otu018	Otu435	0.157604	1.66115e-07	1.20751e-06
Otu295	Otu314	0.157482	1.66115e-07	1.20751e-06
Otu167	Otu449	0.157398	0.006	0.0283936
Otu181	Otu310	0.157219	0.004	0.0206293
Otu153	Otu388	0.156711	1.66115e-07	1.20751e-06
Otu218	Otu415	0.156499	0.006	0.0283936
Otu207	Otu308	0.15647	1.66115e-07	1.20751e-06
Otu222	Otu401	0.156374	1.66115e-07	1.20751e-06
Otu038	Otu369	0.15633	0.006	0.0283936
Otu156	Otu421	0.156296	1.66115e-07	1.20751e-06
Otu218	Otu334	0.156104	0.008	0.0354402
Otu153	Otu431	0.156093	1.66115e-07	1.20751e-06
Otu291	Otu404	0.156068	0.006	0.0283936
Otu289	Otu307	0.15587	0.008	0.0354402
Otu026	Otu334	0.155845	0.008	0.0354402
Otu198	Otu453	0.155813	0.01	0.0419479
Otu302	Otu441	0.155329	0.002	0.0116299
Otu109	Otu353	0.154832	0.006	0.0283936
Otu156	Otu435	0.154596	1.66115e-07	1.20751e-06
Otu148	Otu419	0.154419	0.01	0.0419479
Otu076	Otu358	0.15405	1.66115e-07	1.20751e-06
Otu018	Otu356	0.154008	0.004	0.0206293
Otu113	Otu433	0.153888	0.002	0.0116299
Otu076	Otu429	0.153887	0.002	0.0116299
Otu050	Otu453	0.15385	0.01	0.0419479
Otu018	Otu310	0.153514	0.004	0.0206293
Otu076	Otu309	0.153473	1.66115e-07	1.20751e-06
Otu207	Otu388	0.153108	1.66115e-07	1.20751e-06
Otu224	Otu413	0.153085	0.008	0.0354402
Otu109	Otu394	0.153061	0.002	0.0116299
Otu222	Otu398	0.152871	0.01	0.0419479
Otu207	Otu313	0.152627	1.66115e-07	1.20751e-06
Otu153	Otu421	0.152558	1.66115e-07	1.20751e-06
Otu220	Otu432	0.15248	0.012	0.0479766
Otu076	Otu334	0.152431	1.66115e-07	1.20751e-06
Otu192	Otu443	0.15237	0.006	0.0283936
Otu157	Otu349	0.152103	0.01	0.0419479
Otu302	Otu425	0.152054	0.004	0.0206293
Otu153	Otu313	0.151808	1.66115e-07	1.20751e-06
Otu194	Otu449	0.151625	0.01	0.0419479
Otu275	Otu356	0.151538	0.01	0.0419479
Otu222	Otu426	0.151438	0.01	0.0419479
Otu156	Otu430	0.151231	0.002	0.0116299
Otu222	Otu414	0.150912	0.002	0.0116299
Otu222	Otu407	0.15079	0.008	0.0354402
Otu076	Otu386	0.150705	0.01	0.0419479
Otu165	Otu435	0.150701	1.66115e-07	1.20751e-06
Otu294	Otu402	0.15069	1.66115e-07	1.20751e-06
Otu120	Otu418	0.150597	0.002	0.0116299
Otu150	Otu425	0.150543	0.006	0.0283936
Otu018	Otu416	0.150522	1.66115e-07	1.20751e-06
Otu193	Otu418	0.150373	0.006	0.0283936
Otu156	Otu429	0.150356	0.006	0.0283936
Otu285	Otu404	0.150274	1.66115e-07	1.20751e-06
Otu275	Otu314	0.150274	1.66115e-07	1.20751e-06
Otu208	Otu418	0.15013	0.008	0.0354402
Otu026	Otu431	0.150114	1.66115e-07	1.20751e-06
Otu115	Otu413	0.150114	0.012	0.0479766
Otu018	Otu433	0.150059	0.008	0.0354402
Otu075	Otu307	0.149892	0.012	0.0479766
Otu299	Otu421	0.149752	1.66115e-07	1.20751e-06
Otu194	Otu431	0.149605	1.66115e-07	1.20751e-06
Otu026	Otu433	0.149341	0.004	0.0206293
Otu283	Otu449	0.149292	1.66115e-07	1.20751e-06
Otu018	Otu313	0.149013	1.66115e-07	1.20751e-06
Otu295	Otu405	0.148842	0.01	0.0419479
Otu076	Otu401	0.148837	0.002	0.0116299
Otu014	Otu352	0.148374	0.002	0.0116299
Otu208	Otu429	0.148358	0.004	0.0206293
Otu029	Otu433	0.148337	0.004	0.0206293
Otu192	Otu398	0.148201	0.002	0.0116299
Otu208	Otu421	0.14816	1.66115e-07	1.20751e-06
Otu148	Otu402	0.148005	1.66115e-07	1.20751e-06
Otu076	Otu312	0.147576	1.66115e-07	1.20751e-06
Otu290	Otu343	0.147553	0.012	0.0479766
Otu222	Otu415	0.147485	0.004	0.0206293
Otu217	Otu453	0.147337	0.012	0.0479766
Otu076	Otu388	0.146766	1.66115e-07	1.20751e-06
Otu156	Otu415	0.146749	0.012	0.0479766
Otu285	Otu338	0.146628	0.008	0.0354402
Otu165	Otu308	0.14656	1.66115e-07	1.20751e-06
Otu120	Otu441	0.146491	0.002	0.0116299
Otu207	Otu416	0.146312	0.002	0.0116299
Otu222	Otu394	0.146311	0.004	0.0206293
Otu207	Otu418	0.146295	0.006	0.0283936
Otu018	Otu394	0.146289	1.66115e-07	1.20751e-06
Otu042	Otu345	0.14625	0.002	0.0116299
Otu076	Otu305	0.1461	0.008	0.0354402
Otu299	Otu369	0.145936	0.004	0.0206293
Otu222	Otu312	0.145162	0.004	0.0206293
Otu285	Otu311	0.145139	1.66115e-07	1.20751e-06
Otu004	Otu435	0.144798	1.66115e-07	1.20751e-06
Otu153	Otu358	0.144786	1.66115e-07	1.20751e-06
Otu112	Otu418	0.144707	0.008	0.0354402
Otu207	Otu335	0.144675	0.006	0.0283936
Otu165	Otu398	0.144497	0.006	0.0283936
Otu018	Otu358	0.144487	1.66115e-07	1.20751e-06
Otu075	Otu453	0.144396	0.006	0.0283936
Otu150	Otu386	0.144354	0.002	0.0116299
Otu207	Otu449	0.144321	0.01	0.0419479
Otu076	Otu356	0.144133	0.004	0.0206293
Otu076	Otu413	0.144075	1.66115e-07	1.20751e-06
Otu298	Otu338	0.143481	0.008	0.0354402
Otu207	Otu431	0.14342	1.66115e-07	1.20751e-06
Otu275	Otu312	0.143335	1.66115e-07	1.20751e-06
Otu150	Otu416	0.14326	1.66115e-07	1.20751e-06
Otu030	Otu453	0.143115	0.012	0.0479766
Otu036	Otu310	0.143088	0.004	0.0206293
Otu026	Otu416	0.14282	1.66115e-07	1.20751e-06
Otu162	Otu394	0.142759	1.66115e-07	1.20751e-06
Otu285	Otu398	0.142754	0.002	0.0116299
Otu192	Otu311	0.142746	0.002	0.0116299
Otu150	Otu358	0.142696	1.66115e-07	1.20751e-06
Otu154	Otu388	0.142516	0.002	0.0116299
Otu284	Otu394	0.142485	1.66115e-07	1.20751e-06
Otu295	Otu449	0.14234	0.006	0.0283936
Otu076	Otu412	0.142286	0.006	0.0283936
Otu165	Otu350	0.141687	0.004	0.0206293
Otu112	Otu311	0.141243	1.66115e-07	1.20751e-06
Otu113	Otu310	0.141049	0.008	0.0354402
Otu150	Otu394	0.14085	0.002	0.0116299
Otu289	Otu453	0.140743	0.012	0.0479766
Otu222	Otu311	0.140675	1.66115e-07	1.20751e-06
Otu167	Otu426	0.140575	0.012	0.0479766
Otu165	Otu394	0.140563	0.008	0.0354402
Otu045	Otu432	0.14039	0.002	0.0116299
Otu141	Otu385	0.140332	1.66115e-07	1.20751e-06
Otu148	Otu431	0.140297	1.66115e-07	1.20751e-06
Otu153	Otu311	0.140029	0.002	0.0116299
Otu081	Otu334	0.139941	0.012	0.0479766
Otu237	Otu441	0.139894	0.012	0.0479766
Otu076	Otu313	0.139859	1.66115e-07	1.20751e-06
Otu283	Otu362	0.139605	0.01	0.0419479
Otu285	Otu421	0.139558	1.66115e-07	1.20751e-06
Otu208	Otu308	0.139206	0.002	0.0116299
Otu208	Otu358	0.139158	1.66115e-07	1.20751e-06
Otu208	Otu345	0.13904	0.008	0.0354402
Otu167	Otu418	0.138846	0.008	0.0354402
Otu076	Otu307	0.138769	0.012	0.0479766
Otu275	Otu414	0.138672	0.006	0.0283936
Otu167	Otu435	0.138494	1.66115e-07	1.20751e-06
Otu302	Otu416	0.138224	1.66115e-07	1.20751e-06
Otu208	Otu415	0.138213	0.012	0.0479766
Otu162	Otu313	0.138202	0.002	0.0116299
Otu165	Otu358	0.138075	1.66115e-07	1.20751e-06
Otu162	Otu435	0.138006	1.66115e-07	1.20751e-06
Otu004	Otu394	0.13774	0.006	0.0283936
Otu222	Otu435	0.13758	1.66115e-07	1.20751e-06
Otu284	Otu308	0.137314	1.66115e-07	1.20751e-06
Otu157	Otu441	0.137159	0.008	0.0354402
Otu194	Otu308	0.136797	1.66115e-07	1.20751e-06
Otu076	Otu421	0.136791	1.66115e-07	1.20751e-06
Otu148	Otu313	0.136087	1.66115e-07	1.20751e-06
Otu075	Otu421	0.135922	0.002	0.0116299
Otu207	Otu415	0.135768	0.01	0.0419479
Otu222	Otu413	0.135665	0.01	0.0419479
Otu208	Otu435	0.135522	1.66115e-07	1.20751e-06
Otu207	Otu413	0.135133	0.01	0.0419479
Otu208	Otu394	0.134965	0.002	0.0116299
Otu244	Otu422	0.134785	0.01	0.0419479
Otu042	Otu394	0.134262	0.008	0.0354402
Otu075	Otu416	0.134236	0.002	0.0116299
Otu002	Otu425	0.134163	0.01	0.0419479
Otu294	Otu421	0.134139	0.004	0.0206293
Otu229	Otu437	0.134039	0.012	0.0479766
Otu156	Otu311	0.133769	0.002	0.0116299
Otu167	Otu309	0.133093	1.66115e-07	1.20751e-06
Otu027	Otu356	0.132879	0.008	0.0354402
Otu026	Otu402	0.132734	0.004	0.0206293
Otu294	Otu309	0.132525	0.002	0.0116299
Otu289	Otu401	0.132474	0.004	0.0206293
Otu221	Otu429	0.132369	0.004	0.0206293
Otu038	Otu312	0.132319	1.66115e-07	1.20751e-06
Otu141	Otu443	0.132244	0.008	0.0354402
Otu302	Otu388	0.132009	1.66115e-07	1.20751e-06
Otu018	Otu350	0.131987	0.01	0.0419479
Otu279	Otu313	0.131985	1.66115e-07	1.20751e-06
Otu285	Otu425	0.1319	0.008	0.0354402
Otu162	Otu308	0.131854	1.66115e-07	1.20751e-06
Otu026	Otu308	0.131813	0.002	0.0116299
Otu167	Otu431	0.131564	1.66115e-07	1.20751e-06
Otu275	Otu318	0.131523	1.66115e-07	1.20751e-06
Otu150	Otu309	0.131377	0.002	0.0116299
Otu154	Otu369	0.13102	0.012	0.0479766
Otu244	Otu321	0.130869	0.012	0.0479766
Otu302	Otu421	0.130711	0.002	0.0116299
Otu289	Otu385	0.130696	0.01	0.0419479
Otu165	Otu313	0.13052	0.006	0.0283936
Otu181	Otu401	0.130497	0.002	0.0116299
Otu162	Otu388	0.130256	1.66115e-07	1.20751e-06
Otu157	Otu418	0.130179	0.006	0.0283936
Otu167	Otu414	0.130127	0.002	0.0116299
Otu222	Otu309	0.129966	0.002	0.0116299
Otu036	Otu388	0.129791	0.002	0.0116299
Otu165	Otu388	0.129761	0.004	0.0206293
Otu222	Otu427	0.12974	0.01	0.0419479
Otu165	Otu431	0.129735	1.66115e-07	1.20751e-06
Otu036	Otu401	0.129676	0.008	0.0354402
Otu004	Otu313	0.129548	0.004	0.0206293
Otu018	Otu426	0.129425	0.008	0.0354402
Otu302	Otu313	0.129147	1.66115e-07	1.20751e-06
Otu076	Otu416	0.128929	1.66115e-07	1.20751e-06
Otu011	Otu435	0.128462	0.004	0.0206293
Otu208	Otu313	0.128015	0.008	0.0354402
Otu154	Otu418	0.127578	0.008	0.0354402
Otu156	Otu427	0.127416	0.01	0.0419479
Otu012	Otu401	0.127391	0.004	0.0206293
Otu222	Otu416	0.126851	1.66115e-07	1.20751e-06
Otu012	Otu413	0.126836	0.004	0.0206293
Otu294	Otu312	0.126421	0.004	0.0206293
Otu036	Otu309	0.126112	0.002	0.0116299
Otu004	Otu318	0.125884	0.004	0.0206293
Otu164	Otu388	0.125654	0.002	0.0116299
Otu075	Otu311	0.125588	1.66115e-07	1.20751e-06
Otu113	Otu312	0.125467	0.002	0.0116299
Otu162	Otu416	0.125419	0.002	0.0116299
Otu076	Otu350	0.125271	0.01	0.0419479
Otu036	Otu435	0.125237	0.002	0.0116299
Otu076	Otu435	0.1247	1.66115e-07	1.20751e-06
Otu156	Otu312	0.12444	0.004	0.0206293
Otu195	Otu388	0.124275	0.006	0.0283936
Otu004	Otu309	0.124127	1.66115e-07	1.20751e-06
Otu295	Otu308	0.123993	0.002	0.0116299
Otu038	Otu416	0.123992	1.66115e-07	1.20751e-06
Otu222	Otu314	0.123963	0.004	0.0206293
Otu120	Otu356	0.1229	0.004	0.0206293
Otu141	Otu401	0.122874	0.006	0.0283936
Otu153	Otu318	0.122724	0.01	0.0419479
Otu171	Otu313	0.122676	0.008	0.0354402
Otu029	Otu398	0.122588	0.008	0.0354402
Otu208	Otu388	0.122536	0.006	0.0283936
Otu167	Otu311	0.122366	0.004	0.0206293
Otu192	Otu314	0.122328	0.002	0.0116299
Otu217	Otu312	0.12228	0.006	0.0283936
Otu283	Otu429	0.12187	0.002	0.0116299
Otu285	Otu431	0.121827	0.002	0.0116299
Otu076	Otu402	0.121259	1.66115e-07	1.20751e-06
Otu167	Otu308	0.121081	0.002	0.0116299
Otu157	Otu398	0.121027	0.01	0.0419479
Otu217	Otu318	0.120927	0.004	0.0206293
Otu042	Otu318	0.120896	0.006	0.0283936
Otu162	Otu314	0.120252	1.66115e-07	1.20751e-06
Otu156	Otu416	0.120229	1.66115e-07	1.20751e-06
Otu006	Otu414	0.119558	0.012	0.0479766
Otu222	Otu313	0.119161	0.002	0.0116299
Otu110	Otu318	0.11909	0.004	0.0206293
Otu275	Otu313	0.119068	0.008	0.0354402
Otu283	Otu309	0.11891	0.002	0.0116299
Otu289	Otu413	0.118671	0.006	0.0283936
Otu076	Otu431	0.118365	1.66115e-07	1.20751e-06
Otu162	Otu431	0.118023	0.002	0.0116299
Otu132	Otu313	0.117928	0.004	0.0206293
Otu150	Otu318	0.117926	1.66115e-07	1.20751e-06
Otu295	Otu385	0.117779	0.006	0.0283936
Otu164	Otu435	0.117641	1.66115e-07	1.20751e-06
Otu299	Otu345	0.117351	0.012	0.0479766
Otu177	Otu435	0.117214	0.004	0.0206293
Otu291	Otu314	0.117143	1.66115e-07	1.20751e-06
Otu295	Otu430	0.116536	0.012	0.0479766
Otu076	Otu418	0.116522	0.01	0.0419479
Otu150	Otu335	0.116295	0.012	0.0479766
Otu012	Otu416	0.116137	1.66115e-07	1.20751e-06
Otu285	Otu312	0.115959	1.66115e-07	1.20751e-06
Otu150	Otu350	0.115947	0.012	0.0479766
Otu295	Otu407	0.115933	0.012	0.0479766
Otu170	Otu421	0.115914	0.004	0.0206293
Otu012	Otu407	0.115836	0.008	0.0354402
Otu167	Otu314	0.115759	1.66115e-07	1.20751e-06
Otu299	Otu311	0.115588	0.004	0.0206293
Otu284	Otu402	0.115531	1.66115e-07	1.20751e-06
Otu150	Otu311	0.115473	1.66115e-07	1.20751e-06
Otu112	Otu313	0.115316	0.008	0.0354402
Otu285	Otu356	0.11514	0.006	0.0283936
Otu284	Otu441	0.114986	0.006	0.0283936
Otu148	Otu425	0.114965	0.008	0.0354402
Otu150	Otu417	0.114674	0.01	0.0419479
Otu036	Otu312	0.113942	0.008	0.0354402
Otu207	Otu358	0.113677	0.008	0.0354402
Otu077	Otu402	0.113664	0.008	0.0354402
Otu043	Otu394	0.113476	0.008	0.0354402
Otu294	Otu314	0.113385	0.004	0.0206293
Otu284	Otu416	0.113324	1.66115e-07	1.20751e-06
Otu014	Otu421	0.113163	0.006	0.0283936
Otu193	Otu314	0.113081	0.004	0.0206293
Otu154	Otu312	0.113029	0.006	0.0283936
Otu222	Otu402	0.112787	0.01	0.0419479
Otu192	Otu429	0.112766	0.012	0.0479766
Otu195	Otu416	0.112624	0.006	0.0283936
Otu154	Otu435	0.112509	0.004	0.0206293
Otu165	Otu345	0.112475	0.01	0.0419479
Otu289	Otu421	0.112369	0.002	0.0116299
Otu291	Otu309	0.112311	0.004	0.0206293
Otu217	Otu309	0.112215	1.66115e-07	1.20751e-06
Otu195	Otu314	0.112209	0.002	0.0116299
Otu029	Otu388	0.112122	0.002	0.0116299
Otu109	Otu314	0.111581	0.004	0.0206293
Otu283	Otu311	0.111503	0.002	0.0116299
Otu171	Otu308	0.111393	0.002	0.0116299
Otu109	Otu311	0.111236	0.002	0.0116299
Otu112	Otu312	0.111215	0.004	0.0206293
Otu120	Otu431	0.111051	1.66115e-07	1.20751e-06
Otu026	Otu388	0.111015	0.012	0.0479766
Otu275	Otu435	0.11086	1.66115e-07	1.20751e-06
Otu181	Otu313	0.110109	0.004	0.0206293
Otu177	Otu388	0.109797	0.008	0.0354402
Otu120	Otu416	0.109541	1.66115e-07	1.20751e-06
Otu295	Otu345	0.109196	0.01	0.0419479
Otu283	Otu416	0.107444	1.66115e-07	1.20751e-06
Otu208	Otu402	0.10709	0.006	0.0283936
Otu294	Otu358	0.106826	0.006	0.0283936
Otu285	Otu402	0.106672	0.006	0.0283936
Otu283	Otu358	0.106593	1.66115e-07	1.20751e-06
Otu120	Otu421	0.106297	0.008	0.0354402
Otu150	Otu431	0.106105	0.004	0.0206293
Otu076	Otu394	0.106088	0.012	0.0479766
Otu285	Otu309	0.106054	1.66115e-07	1.20751e-06
Otu289	Otu313	0.105998	0.01	0.0419479
Otu120	Otu402	0.105977	0.004	0.0206293
Otu150	Otu426	0.105281	0.008	0.0354402
Otu194	Otu314	0.105131	0.008	0.0354402
Otu029	Otu435	0.105119	0.006	0.0283936
Otu018	Otu431	0.104946	1.66115e-07	1.20751e-06
Otu171	Otu388	0.104897	0.01	0.0419479
Otu194	Otu311	0.104883	0.006	0.0283936
Otu222	Otu308	0.104834	0.004	0.0206293
Otu167	Otu312	0.104749	0.004	0.0206293
Otu300	Otu311	0.10472	1.66115e-07	1.20751e-06
Otu291	Otu431	0.104719	0.008	0.0354402
Otu283	Otu345	0.104672	0.012	0.0479766
Otu018	Otu414	0.104539	0.002	0.0116299
Otu275	Otu416	0.10447	0.002	0.0116299
Otu148	Otu312	0.104385	0.004	0.0206293
Otu302	Otu435	0.104224	0.01	0.0419479
Otu284	Otu311	0.103928	0.004	0.0206293
Otu006	Otu416	0.103791	0.002	0.0116299
Otu004	Otu431	0.103775	0.008	0.0354402
Otu275	Otu421	0.103371	0.008	0.0354402
Otu127	Otu308	0.10321	0.006	0.0283936
Otu167	Otu416	0.103159	1.66115e-07	1.20751e-06
Otu012	Otu311	0.102856	0.006	0.0283936
Otu289	Otu416	0.102166	1.66115e-07	1.20751e-06
Otu036	Otu416	0.102088	0.002	0.0116299
Otu167	Otu421	0.101604	0.012	0.0479766
Otu026	Otu358	0.101552	0.01	0.0419479
Otu275	Otu311	0.100965	0.006	0.0283936
Otu026	Otu421	0.100269	0.006	0.0283936
Otu018	Otu402	0.099401	0.008	0.0354402
Otu289	Otu435	0.099277	0.002	0.0116299
Otu302	Otu314	0.099109	0.002	0.0116299
Otu156	Otu308	0.099093	0.002	0.0116299
Otu170	Otu435	0.098585	0.012	0.0479766
Otu148	Otu416	0.098444	0.004	0.0206293
Otu289	Otu402	0.098376	0.006	0.0283936
Otu110	Otu388	0.098275	0.012	0.0479766
Otu046	Otu308	0.097496	0.006	0.0283936
Otu298	Otu308	0.097425	0.002	0.0116299
Otu006	Otu435	0.097286	0.01	0.0419479
Otu284	Otu309	0.096911	0.004	0.0206293
Otu075	Otu402	0.096883	0.012	0.0479766
Otu222	Otu431	0.096705	0.012	0.0479766
Otu110	Otu311	0.096436	0.008	0.0354402
Otu043	Otu312	0.096416	0.012	0.0479766
Otu004	Otu314	0.095875	0.006	0.0283936
Otu002	Otu388	0.095751	0.012	0.0479766
Otu150	Otu429	0.095495	0.012	0.0479766
Otu012	Otu435	0.095223	0.004	0.0206293
Otu289	Otu311	0.09522	0.008	0.0354402
Otu283	Otu308	0.09517	0.002	0.0116299
Otu150	Otu435	0.094634	0.006	0.0283936
Otu012	Otu308	0.094553	0.002	0.0116299
Otu156	Otu314	0.094366	0.006	0.0283936
Otu285	Otu416	0.093912	0.002	0.0116299
Otu154	Otu431	0.093912	0.004	0.0206293
Otu192	Otu416	0.093798	0.002	0.0116299
Otu109	Otu431	0.093023	0.008	0.0354402
Otu217	Otu416	0.092699	0.008	0.0354402
Otu109	Otu308	0.09112	0.008	0.0354402
Otu169	Otu435	0.089507	0.004	0.0206293
Otu012	Otu358	0.089268	0.008	0.0354402
Otu299	Otu435	0.088882	0.004	0.0206293
Otu295	Otu388	0.088589	0.01	0.0419479
Otu289	Otu314	0.087162	0.004	0.0206293
Otu014	Otu431	0.086915	0.01	0.0419479
Otu275	Otu308	0.086788	0.008	0.0354402
Otu171	Otu314	0.086679	0.004	0.0206293
Otu150	Otu314	0.086472	0.01	0.0419479
Otu148	Otu388	0.085942	0.012	0.0479766
Otu291	Otu416	0.085599	0.012	0.0479766
Otu284	Otu431	0.083392	0.01	0.0419479
Otu039	Otu314	0.079918	0.01	0.0419479
Otu149	Otu416	-0.066821	0.012	0.0479766
Otu101	Otu416	-0.067933	0.01	0.0419479
Otu010	Otu416	-0.07149	0.01	0.0419479
Otu184	Otu314	-0.074381	0.012	0.0479766
Otu101	Otu431	-0.07472	0.012	0.0479766
Otu201	Otu308	-0.074857	0.012	0.0479766
Otu158	Otu311	-0.074945	0.012	0.0479766
Otu079	Otu435	-0.075041	0.008	0.0354402
Otu231	Otu311	-0.075123	0.012	0.0479766
Otu047	Otu358	-0.075412	0.01	0.0419479
Otu135	Otu416	-0.07671	0.01	0.0419479
Otu227	Otu416	-0.077177	0.012	0.0479766
Otu255	Otu358	-0.077638	0.012	0.0479766
Otu008	Otu309	-0.079073	0.012	0.0479766
Otu296	Otu308	-0.079232	0.01	0.0419479
Otu178	Otu308	-0.080419	0.006	0.0283936
Otu019	Otu416	-0.080742	0.006	0.0283936
Otu028	Otu431	-0.080849	0.012	0.0479766
Otu062	Otu416	-0.081191	0.01	0.0419479
Otu238	Otu416	-0.081407	0.002	0.0116299
Otu278	Otu308	-0.081601	0.012	0.0479766
Otu278	Otu435	-0.081707	0.012	0.0479766
Otu209	Otu416	-0.081968	0.012	0.0479766
Otu183	Otu309	-0.082193	0.012	0.0479766
Otu124	Otu416	-0.082206	0.006	0.0283936
Otu213	Otu435	-0.082575	0.008	0.0354402
Otu292	Otu308	-0.083057	0.012	0.0479766
Otu063	Otu416	-0.083271	0.002	0.0116299
Otu137	Otu416	-0.083593	0.006	0.0283936
Otu253	Otu311	-0.083626	0.004	0.0206293
Otu213	Otu416	-0.083664	0.008	0.0354402
Otu145	Otu308	-0.083714	0.004	0.0206293
Otu044	Otu431	-0.083886	0.008	0.0354402
Otu201	Otu314	-0.084021	0.006	0.0283936
Otu265	Otu421	-0.084364	0.01	0.0419479
Otu083	Otu314	-0.084463	1.66115e-07	1.20751e-06
Otu119	Otu435	-0.084551	0.012	0.0479766
Otu212	Otu435	-0.084983	0.006	0.0283936
Otu270	Otu416	-0.085167	1.66115e-07	1.20751e-06
Otu121	Otu421	-0.085237	0.01	0.0419479
Otu121	Otu431	-0.085395	0.012	0.0479766
Otu100	Otu358	-0.08568	0.008	0.0354402
Otu201	Otu435	-0.085812	0.008	0.0354402
Otu248	Otu308	-0.08603	0.006	0.0283936
Otu296	Otu311	-0.086096	0.004	0.0206293
Otu290	Otu358	-0.086717	0.012	0.0479766
Otu010	Otu421	-0.086835	0.012	0.0479766
Otu176	Otu435	-0.086868	0.012	0.0479766
Otu124	Otu358	-0.086963	0.012	0.0479766
Otu200	Otu431	-0.087106	0.006	0.0283936
Otu212	Otu314	-0.087357	0.008	0.0354402
Otu213	Otu402	-0.087556	0.004	0.0206293
Otu206	Otu435	-0.087594	0.01	0.0419479
Otu188	Otu431	-0.087784	0.008	0.0354402
Otu189	Otu435	-0.087894	0.01	0.0419479
Otu235	Otu314	-0.087931	0.012	0.0479766
Otu140	Otu358	-0.087956	0.01	0.0419479
Otu064	Otu431	-0.087991	0.012	0.0479766
Otu080	Otu308	-0.088256	0.004	0.0206293
Otu257	Otu311	-0.088509	0.012	0.0479766
Otu160	Otu308	-0.088652	0.004	0.0206293
Otu227	Otu314	-0.088931	0.008	0.0354402
Otu249	Otu312	-0.088962	0.012	0.0479766
Otu270	Otu358	-0.089013	0.008	0.0354402
Otu044	Otu308	-0.089214	0.012	0.0479766
Otu047	Otu314	-0.089306	0.002	0.0116299
Otu130	Otu314	-0.089338	0.012	0.0479766
Otu203	Otu388	-0.089398	0.012	0.0479766
Otu057	Otu388	-0.089409	0.008	0.0354402
Otu114	Otu402	-0.089641	0.006	0.0283936
Otu254	Otu431	-0.089723	0.008	0.0354402
Otu296	Otu416	-0.089906	0.002	0.0116299
Otu257	Otu308	-0.089988	0.004	0.0206293
Otu147	Otu358	-0.090277	0.01	0.0419479
Otu019	Otu308	-0.090285	0.01	0.0419479
Otu168	Otu311	-0.090574	0.004	0.0206293
Otu025	Otu402	-0.090662	0.01	0.0419479
Otu124	Otu402	-0.091076	0.004	0.0206293
Otu212	Otu309	-0.091132	0.012	0.0479766
Otu233	Otu402	-0.091267	0.01	0.0419479
Otu257	Otu435	-0.091271	0.006	0.0283936
[truncated: 6,667 more rows]
