# Supplementary material
Source: HighWire-hosted journal article supplement (https://gut.bmj.com/content/gutjnl-2018-317178)
Supplement: inline-supplementary-material-26 [file inline-supplementary-material-26.xls]

## Sheet: Additional file
Coverage of Saccharomycetes, Malasseziomycetes and Pneumocystidomycetes
Average lenght of Saccharomycetes genome in database: 12,794,806 bp
Average lenght of Malasseziomycetes genome in database: 8,259,485 bp
Average lenght of Pneumocystidomycetes genome in database:7,799,642 bp
Sample_ID	Study_id	Lenght_of_kmers_assigned_Saccharomycetes	Lenght_of_kmers_assigned_Malasseziomycetes	Lenght_of_kmers_assigned_Pneumocystdiomycetes	Coverage_Saccharomycetes	Coverage_Malasseziomycetes	Coverage_Pneumocystdiomycetes
502A	Discovery_cohort	196342	4360	3577	0.0153454	0.000527878	0.000458611
506A	Discovery_cohort	86534	753	1205	0.00676321	9.11679e-05	0.000154494
509A	Discovery_cohort	466407	0	1608	0.0364528	0	0.000206163
512A	Discovery_cohort	147360	27177	20068	0.0115172	0.0032904	0.00257294
515A	Discovery_cohort	727193	402	2568	0.056835	4.86713e-05	0.000329246
516A	Discovery_cohort	48342	2452	402	0.00377825	0.000296871	5.15408e-05
517A	Discovery_cohort	655371	1751	0	0.0512216	0.000211999	0
519A	Discovery_cohort	287194	9871	0	0.0224461	0.00119511	0
522A	Discovery_cohort	84417	17974	1005	0.00659776	0.00217616	0.000128852
530A	Discovery_cohort	426647	0	0	0.0333453	0	0
531A	Discovery_cohort	108626	2453	980	0.00848985	0.000296992	0.000125647
534A	Discovery_cohort	92339	399	0	0.00721691	4.83081e-05	0
536A	Discovery_cohort	180664	6480	803	0.0141201	0.000784552	0.000102953
A10A	Discovery_cohort	94980	147918	602	0.00742332	0.0179089	7.7183e-05
A21A	Discovery_cohort	59919	0	1005	0.00468307	0	0.000128852
A51A	Discovery_cohort	5461196	9212	400	0.426829	0.00111532	5.12844e-05
A60A	Discovery_cohort	109707	399	16938	0.00857434	4.83081e-05	0.00217164
ANS1024	Discovery_cohort	196497	2198	1752	0.0153576	0.000266118	0.000224626
ANS1037	Discovery_cohort	1293313	2791	8154	0.101081	0.000337914	0.00104543
ANS1038	Discovery_cohort	3837346	3193	4549	0.299914	0.000386586	0.000583232
ANS1101	Discovery_cohort	265601	1360	0	0.0207585	0.000164659	0
ANS1112	Discovery_cohort	243309	15449	1809	0.0190162	0.00187046	0.000231934
ANS1114	Discovery_cohort	165674	3571	1808	0.0129485	0.000432351	0.000231806
ANS1115	Discovery_cohort	232341	8461	801	0.018159	0.0010244	0.000102697
ANS1119	Discovery_cohort	7282149	989	5437	0.569149	0.000119741	0.000697083
ANS1133	Discovery_cohort	309124	8637	519	0.0241601	0.00104571	6.65415e-05
ANS1135	Discovery_cohort	160871	4954	2604	0.0125731	0.000599795	0.000333861
ANS1170	Discovery_cohort	702868	1754	7769	0.0549339	0.000212362	0.000996071
ANS1178	Discovery_cohort	62175	2001	11563	0.00485939	0.000242267	0.0014825
ANS1186	Discovery_cohort	430799	1204	2010	0.0336698	0.000145772	0.000257704
ANS1189	Discovery_cohort	1596132	5258	2211	0.124748	0.000636601	0.000283474
ANS1190	Discovery_cohort	14585333	4461	3399	1.13994	0.000540106	0.000435789
ANS1205	Discovery_cohort	213114	12295	1005	0.0166563	0.00148859	0.000128852
ANS1217	Discovery_cohort	1223178	1980	7633	0.0955996	0.000239724	0.000978635
ANS1218	Discovery_cohort	283410	1767	2201	0.0221504	0.000213936	0.000282192
ANS1222	Discovery_cohort	1673482	2203	0	0.130794	0.000266724	0
ANS1454	Discovery_cohort	194150	4871	201	0.0151741	0.000589746	2.57704e-05
ANS1456	Discovery_cohort	285708	2010	0	0.02233	0.000243357	0
ANS1475	Discovery_cohort	17760569	7270	3605	1.38811	0.0008802	0.000462201
ANS16	Discovery_cohort	382091	3590	564	0.029863	0.000434652	7.2311e-05
ANS19	Discovery_cohort	249575	15198	5193	0.019506	0.00184007	0.0006658
ANS23	Discovery_cohort	118099	972	4422	0.00923023	0.000117683	0.000566949
ANS27	Discovery_cohort	281095	982	17573	0.0219695	0.000118894	0.00225305
ANS3	Discovery_cohort	2067685	2590	947	0.161603	0.000313579	0.000121416
ANS30	Discovery_cohort	961821	28031	1808	0.0751728	0.0033938	0.000231806
ANS31	Discovery_cohort	192265	5936	1005	0.0150268	0.000718689	0.000128852
ANS46	Discovery_cohort	111079	8244	1005	0.00868157	0.000998125	0.000128852
ANS49	Discovery_cohort	178986	8380	2576	0.013989	0.00101459	0.000330272
ANS52	Discovery_cohort	287313	2173	3142	0.0224554	0.000263091	0.000402839
ANS7	Discovery_cohort	126107	7949	1407	0.00985611	0.000962409	0.000180393
ANS71	Discovery_cohort	456062	27736	6431	0.0356443	0.00335808	0.000824525
ANS78	Discovery_cohort	417444	2412	2010	0.0326261	0.000292028	0.000257704
ANS85	Discovery_cohort	1096686	400	1005	0.0857134	4.84292e-05	0.000128852
ANS97	Discovery_cohort	959853	3343	2613	0.075019	0.000404747	0.000335015
M113A	Discovery_cohort	29466	365	402	0.00230297	4.41916e-05	5.15408e-05
M115A	Discovery_cohort	361699	1248567	4003	0.0282692	0.151168	0.000513229
M116A	Discovery_cohort	138396	10276	1407	0.0108166	0.00124415	0.000180393
M117A	Discovery_cohort	29851	8446	0	0.00233306	0.00102258	0
M118A	Discovery_cohort	124256	290346	800	0.00971144	0.035153	0.000102569
M122A	Discovery_cohort	60766	3085	402	0.00474927	0.00037351	5.15408e-05
M123A	Discovery_cohort	23041	3354	171	0.00180081	0.000406079	2.19241e-05
M2-PK001A	Discovery_cohort	169492	1601	1496	0.0132469	0.000193838	0.000191804
M2-PK002A	Discovery_cohort	165590	7023	8242	0.012942	0.000850295	0.00105672
M2-PK003A	Discovery_cohort	4038599	551	2361	0.315644	6.67112e-05	0.000302706
M2-PK004A	Discovery_cohort	1064551	5071	9866	0.0832018	0.000613961	0.00126493
M2-PK005A	Discovery_cohort	32106	583	0	0.0025093	7.05855e-05	0
M2-PK006A	Discovery_cohort	194835	6487	2564	0.0152277	0.0007854	0.000328733
M2-PK007A	Discovery_cohort	33166	5485	995	0.00259215	0.000664085	0.00012757
M2-PK008A	Discovery_cohort	78974	1147	603	0.00617235	0.000138871	7.73112e-05
M2-PK009A	Discovery_cohort	79881	5911	1206	0.00624324	0.000715662	0.000154622
M2-PK010A	Discovery_cohort	74393	7625	402	0.00581431	0.000923181	5.15408e-05
M2-PK011A	Discovery_cohort	64350	804	400	0.00502938	9.73426e-05	5.12844e-05
M2-PK012A	Discovery_cohort	291138	6436	3324	0.0227544	0.000779225	0.000426173
M2-PK013A	Discovery_cohort	19467	201	0	0.00152148	2.43357e-05	0
M2-PK014A	Discovery_cohort	161891	2523	402	0.0126529	0.000305467	5.15408e-05
M2-PK015A	Discovery_cohort	140075	4254	1407	0.0109478	0.000515044	0.000180393
M2-PK016A	Discovery_cohort	167414	7669	5264	0.0130845	0.000928508	0.000674903
M2-PK017A	Discovery_cohort	79526	1346	201	0.00621549	0.000162964	2.57704e-05
M2-PK018A	Discovery_cohort	192468	3869	3815	0.0150427	0.000468431	0.000489125
M2-PK019A	Discovery_cohort	163592	36390	0	0.0127858	0.00440584	0
M2-PK021A	Discovery_cohort	52971	3690	2114	0.00414004	0.000446759	0.000271038
M2-PK022A	Discovery_cohort	124229	19447	2153	0.00970933	0.00235451	0.000276038
M2-PK023A	Discovery_cohort	162032	2904	0	0.0126639	0.000351596	0
M2-PK024A	Discovery_cohort	91519	15210	201	0.00715282	0.00184152	2.57704e-05
M2-PK026A	Discovery_cohort	168553	253918	11377	0.0131735	0.0307426	0.00145866
M2-PK027A	Discovery_cohort	901661	7761	1402	0.0704709	0.000939647	0.000179752
M2-PK029A	Discovery_cohort	232755	4962	201	0.0181914	0.000600764	2.57704e-05
M2-PK030A	Discovery_cohort	129683	8394	295	0.0101356	0.00101629	3.78222e-05
M2-PK032A	Discovery_cohort	114598	22320	10896	0.0089566	0.00270235	0.00139699
M2-PK037A	Discovery_cohort	2558726	2333	6999	0.199982	0.000282463	0.000897349
M2-PK038A	Discovery_cohort	229255	10889	3970	0.0179178	0.00131836	0.000508998
M2-PK041A	Discovery_cohort	50879	386	402	0.00397654	4.67341e-05	5.15408e-05
M2-PK042A	Discovery_cohort	271198	1600	201	0.0211959	0.000193717	2.57704e-05
M2-PK043A	Discovery_cohort	50936	199	0	0.00398099	2.40935e-05	0
M2-PK045A	Discovery_cohort	3415308	2889	402	0.266929	0.00034978	5.15408e-05
M2-PK046A	Discovery_cohort	114166	184772	770	0.00892284	0.0223709	9.87225e-05
M2-PK047A	Discovery_cohort	60783	5516	201	0.0047506	0.000667838	2.57704e-05
M2-PK051A	Discovery_cohort	65006	1171	603	0.00508066	0.000141776	7.73112e-05
M2-PK052A	Discovery_cohort	168177	2600	3519	0.0131442	0.00031479	0.000451175
M2-PK055A	Discovery_cohort	59227	14237	1005	0.00462899	0.00172372	0.000128852
M2-PK056B	Discovery_cohort	207740	10091	804	0.0162363	0.00122175	0.000103082
M2-PK059A	Discovery_cohort	140376	969	1571	0.0109713	0.00011732	0.000201419
M2-PK063A	Discovery_cohort	1029391	11824	3438	0.0804538	0.00143157	0.000440789
M2-PK064A	Discovery_cohort	36803	1835	1407	0.0028764	0.000222169	0.000180393
M2-PK065A	Discovery_cohort	1444014	2208	545	0.112859	0.000267329	6.9875e-05
M2-PK066A	Discovery_cohort	150348	242868	2314	0.0117507	0.0294047	0.00029668
M2-PK067A	Discovery_cohort	59521	8621	971	0.00465197	0.00104377	0.000124493
M2-PK069B	Discovery_cohort	122965	5171	804	0.00961054	0.000626068	0.000103082
M2-PK083B	Discovery_cohort	69170	1407	1206	0.0054061	0.00017035	0.000154622
M2-PK084A	Discovery_cohort	29739	1156	2149	0.0023243	0.00013996	0.000275525
M2-PK085A	Discovery_cohort	117665	14806	0	0.00919631	0.00179261	0
M2-PK504A	Discovery_cohort	166812	201	776	0.0130375	2.43357e-05	9.94917e-05
M2-PK514A	Discovery_cohort	41419	0	951	0.00323717	0	0.000121929
M2-PK520B	Discovery_cohort	138233	2743	3415	0.0108038	0.000332103	0.000437841
M2-PK523A	Discovery_cohort	245842	3712	5422	0.0192142	0.000449423	0.00069516
M2-PK524A	Discovery_cohort	47326	1381	982	0.00369884	0.000167202	0.000125903
M2-PK531B	Discovery_cohort	176599	5313	3417	0.0138024	0.00064326	0.000438097
M2-PK532A	Discovery_cohort	51151	1597	1608	0.00399779	0.000193354	0.000206163
M2-PK533A	Discovery_cohort	263105	4101	397	0.0205634	0.00049652	5.08998e-05
M2-PK543A	Discovery_cohort	360729	1646	402	0.0281934	0.000199286	5.15408e-05
M2-PK548A	Discovery_cohort	236762	522	2181	0.0185045	6.32001e-05	0.000279628
M2-PK556A	Discovery_cohort	103619	3016	1172	0.00809852	0.000365156	0.000150263
M2-PK558A	Discovery_cohort	307715	12334	1603	0.02405	0.00149331	0.000205522
M2-PK602A	Discovery_cohort	285496	1258	987	0.0223134	0.00015231	0.000126544
M2-PK615A	Discovery_cohort	225554	3778	2543	0.0176286	0.000457414	0.000326041
M2-PK617A	Discovery_cohort	57066	5759	1139	0.00446009	0.000697259	0.000146032
M2-PK619A	Discovery_cohort	224414	399	0	0.0175395	4.83081e-05	0
M2-PK630A	Discovery_cohort	213518	9173	4005	0.0166879	0.0011106	0.000513485
M2-PK644A	Discovery_cohort	125174	201	2129	0.00978319	2.43357e-05	0.000272961
M2-PK647A	Discovery_cohort	93189	493	21197	0.00728335	5.9689e-05	0.00271769
M2-PK649A	Discovery_cohort	133586	980	4949	0.0104406	0.000118651	0.000634516
M2-PK653A	Discovery_cohort	1278195	956	501	0.0998995	0.000115746	6.42337e-05
M2-PK656A	Discovery_cohort	528403	1919	5020	0.0412982	0.000232339	0.000643619
M2-PK659A	Discovery_cohort	640121	3369	3764	0.0500298	0.000407895	0.000482586
M2-PK663A	Discovery_cohort	58685	3302	941	0.00458663	0.000399783	0.000120647
M2-PK699A	Discovery_cohort	135926	3181	6568	0.0106235	0.000385133	0.00084209
M2-PK701A	Discovery_cohort	165643	5807	3994	0.0129461	0.000703071	0.000512075
M2-PK705A	Discovery_cohort	144678	189	19807	0.0113076	2.28828e-05	0.00253948
M2-PK708A	Discovery_cohort	181427	3403	2401	0.0141797	0.000412011	0.000307835
M2-PK710A	Discovery_cohort	1209560	3407	4404	0.0945352	0.000412495	0.000564641
M2-PK712A	Discovery_cohort	128171	201	402	0.0100174	2.43357e-05	5.15408e-05
M2-PK723A	Discovery_cohort	107420	1156	2508	0.00839559	0.00013996	0.000321553
M2-PK725A	Discovery_cohort	270503	7470	2188	0.0211416	0.000904415	0.000280526
M2-PK729A	Discovery_cohort	186768	12536	603	0.0145972	0.00151777	7.73112e-05
M2-PK730A	Discovery_cohort	88692	2432	3495	0.00693188	0.000294449	0.000448098
M2-PK732A	Discovery_cohort	34564	7121	1206	0.00270141	0.00086216	0.000154622
M2-PK750A	Discovery_cohort	53888	201	802	0.00421171	2.43357e-05	0.000102825
M2-PK751A	Discovery_cohort	220679	1406	121	0.0172475	0.000170229	1.55135e-05
M2-PK797A	Discovery_cohort	105281	1290	201	0.00822842	0.000156184	2.57704e-05
M2-PK801A	Discovery_cohort	13071512	6519	6846	1.02163	0.000789274	0.000877733
M84A	Discovery_cohort	205765	2261	191	0.0160819	0.000273746	2.44883e-05
M89A	Discovery_cohort	28775	11644	162	0.00224896	0.00140977	2.07702e-05
MSC103A	Discovery_cohort	196005	4327	603	0.0153191	0.000523882	7.73112e-05
MSC119A	Discovery_cohort	319853	2941	0	0.0249987	0.000356075	0
MSC120A	Discovery_cohort	144005	8963	402	0.011255	0.00108518	5.15408e-05
MSC1A	Discovery_cohort	77799	2796	190	0.00608051	0.00033852	2.43601e-05
MSC45A	Discovery_cohort	148764	6251	2320	0.0116269	0.000756827	0.000297449
MSC4A	Discovery_cohort	502420	12667	0	0.0392675	0.00153363	0
MSC54A	Discovery_cohort	76374	198477	402	0.00596914	0.0240302	5.15408e-05
MSC63A	Discovery_cohort	49085	16129	982	0.00383632	0.00195279	0.000125903
MSC6A	Discovery_cohort	36227	4358	694	0.00283138	0.000527636	8.89784e-05
MSC76A	Discovery_cohort	200912	50822	1407	0.0157026	0.00615317	0.000180393
MSC78A	Discovery_cohort	48269	62293	804	0.00377255	0.007542	0.000103082
MSC79A	Discovery_cohort	82490	10208	201	0.00644715	0.00123591	2.57704e-05
MSC81A	Discovery_cohort	303912	5360	394	0.0237528	0.000648951	5.05151e-05
DE-013	European_cohort_V2	37629	272	0	0.00294096	3.29318e-05	0
DE-025	European_cohort_V2	48288	1787	3176	0.00377403	0.000216357	0.000407198
DE-029	European_cohort_V2	90495	1123	0	0.00707279	0.000135965	0
DE-031	European_cohort_V2	98874	1246	984	0.00772767	0.000150857	0.00012616
DE-034	European_cohort_V2	299019	410	1684	0.0233703	4.96399e-05	0.000215907
DE-037	European_cohort_V2	38732	1097	1250	0.00302717	0.000132817	0.000160264
DE-038	European_cohort_V2	19218	9945	142	0.00150202	0.00120407	1.8206e-05
DE-039	European_cohort_V2	24373	6390	20148	0.00190491	0.000773656	0.0025832
DE-044	European_cohort_V2	16875	1671	564	0.00131889	0.000202313	7.2311e-05
DE-045	European_cohort_V2	54836	1112	141	0.0042858	0.000134633	1.80778e-05
DE-046	European_cohort_V2	153325	414	556	0.0119834	5.01242e-05	7.12853e-05
DE-049	European_cohort_V2	31502	420	2554	0.00246209	5.08506e-05	0.000327451
DE-062	European_cohort_V2	560821	274	140	0.0438319	3.3174e-05	1.79495e-05
DE-073	European_cohort_V2	72343	3648	424	0.00565409	0.000441674	5.43615e-05
DE-074	European_cohort_V2	444570	2826	570	0.0347461	0.000342152	7.30803e-05
DE-075	European_cohort_V2	1244373	3379	4969	0.0972561	0.000409105	0.000637081
DE-076	European_cohort_V2	446089	7165	0	0.0348649	0.000867487	0
DE-077	European_cohort_V2	179364	2948	956	0.0140185	0.000356923	0.00012257
DE-079	European_cohort_V2	324054	992	284	0.025327	0.000120104	3.64119e-05
DE-080	European_cohort_V2	168679	2390	19304	0.0131834	0.000289364	0.00247499
DE-081	European_cohort_V2	131381	0	1322	0.0102683	0	0.000169495
DE-082	European_cohort_V2	273233	2518	8129	0.021355	0.000304862	0.00104223
DE-083	European_cohort_V2	243489	837	0	0.0190303	0.000101338	0
DE-084	European_cohort_V2	31734	0	4023	0.00248023	0	0.000515793
DE-085	European_cohort_V2	24205	3256	274	0.00189178	0.000394213	3.51298e-05
DE-086	European_cohort_V2	100926	4400	415	0.00788804	0.000532721	5.32076e-05
DE-087	European_cohort_V2	169892	280	422	0.0132782	3.39004e-05	5.4105e-05
DE-088	European_cohort_V2	250623	278	138	0.0195879	3.36583e-05	1.76931e-05
DE-089	European_cohort_V2	3723039	278	142	0.29098	3.36583e-05	1.8206e-05
DE-09	European_cohort_V2	51716	2502	0	0.00404195	0.000302924	0
DE-090	European_cohort_V2	73501	4186	4602	0.0057446	0.000506811	0.000590027
DE-091	European_cohort_V2	190094	4172	3491	0.0148571	0.000505116	0.000447585
DE-092	European_cohort_V2	38165	7476	416	0.00298285	0.000905141	5.33358e-05
DE-093	European_cohort_V2	76143	1668	0	0.00595109	0.00020195	0
DE-094	European_cohort_V2	21530	556	0	0.00168271	6.73165e-05	0
DE-095	European_cohort_V2	41525	1666	0	0.00324546	0.000201708	0
DE-096	European_cohort_V2	1076288	1668	141	0.0841191	0.00020195	1.80778e-05
DE-097	European_cohort_V2	117101	2788	421	0.00915223	0.000337551	5.39768e-05
DE-098	European_cohort_V2	47303	1376	275	0.00369705	0.000166596	3.5258e-05
DE-099	European_cohort_V2	32625	0	0	0.00254986	0	0
DE-100	European_cohort_V2	459229	12766	279	0.0358918	0.00154562	3.57709e-05
DE-101	European_cohort_V2	18228	846	12060	0.00142464	0.000102428	0.00154622
DE-102	European_cohort_V2	32988	2884	143	0.00257823	0.000349174	1.83342e-05
FR-001	European_cohort_V2	77435	440	1796	0.00605207	5.32721e-05	0.000230267
FR-003	European_cohort_V2	33240	5284	282	0.00259793	0.000639749	3.61555e-05
FR-024	European_cohort_V2	25854	2400	133	0.00202066	0.000290575	1.70521e-05
FR-025	European_cohort_V2	92501	4620	1664	0.00722957	0.000559357	0.000213343
FR-026	European_cohort_V2	187535	262	531	0.0146571	3.17211e-05	6.808e-05
FR-027	European_cohort_V2	204792	3558	694	0.0160059	0.000430777	8.89784e-05
FR-030	European_cohort_V2	86126	2194	820	0.00673133	0.000265634	0.000105133
FR-039	European_cohort_V2	47389	418	870	0.00370377	5.06085e-05	0.000111544
FR-040	European_cohort_V2	43136	220	114	0.00337137	2.6636e-05	1.46161e-05
FR-051	European_cohort_V2	87036	208	204	0.00680245	2.51832e-05	2.6155e-05
FR-052	European_cohort_V2	473490	418	531	0.0370064	5.06085e-05	6.808e-05
FR-053	European_cohort_V2	146403	1382	279	0.0114424	0.000167323	3.57709e-05
FR-054	European_cohort_V2	115839	1978	0	0.0090536	0.000239482	0
FR-060	European_cohort_V2	996082	430	213	0.0778505	5.20614e-05	2.73089e-05
FR-105	European_cohort_V2	273322	2444	138	0.0213619	0.000295902	1.76931e-05
FR-110	European_cohort_V2	49801	218	1786	0.00389228	2.63939e-05	0.000228985
FR-113	European_cohort_V2	73377	6240	1272	0.00573491	0.000755495	0.000163084
FR-115	European_cohort_V2	138780	768	0	0.0108466	9.2984e-05	0
FR-116	European_cohort_V2	4409112	644	217	0.344602	7.7971e-05	2.78218e-05
FR-118	European_cohort_V2	228485	11268	0	0.0178576	0.00136425	0
FR-121	European_cohort_V2	83211	7148	3497	0.0065035	0.000865429	0.000448354
FR-125	European_cohort_V2	361961	796	1626	0.0282897	9.6374e-05	0.000208471
FR-129	European_cohort_V2	63598	818	138	0.00497061	9.90377e-05	1.76931e-05
FR-132	European_cohort_V2	70506	4998	1546	0.00551052	0.000605122	0.000198214
FR-139	European_cohort_V2	169372	834	281	0.0132376	0.000100975	3.60273e-05
FR-142	European_cohort_V2	107730	1964	2124	0.00841982	0.000237787	0.00027232
FR-152	European_cohort_V2	262488	2582	1884	0.0205152	0.00031261	0.00024155
FR-156	European_cohort_V2	322867	29732	1946	0.0252342	0.00359974	0.000249499
FR-161	European_cohort_V2	31122	2222	2684	0.00243239	0.000269024	0.000344118
FR-162	European_cohort_V2	208758	1532	1543	0.0163158	0.000185484	0.00019783
FR-166	European_cohort_V2	1330741	530	2183	0.104006	6.41686e-05	0.000279885
FR-169	European_cohort_V2	59902	4356	970	0.00468174	0.000527394	0.000124365
FR-170	European_cohort_V2	43207	542	549	0.00337692	6.56215e-05	7.03878e-05
FR-173	European_cohort_V2	11345	1160	1319	0.000886688	0.000140445	0.00016911
FR-187	European_cohort_V2	232552	2780	560	0.0181755	0.000336583	7.17982e-05
FR-191	European_cohort_V2	127889	5984	1390	0.00999538	0.0007245	0.000178213
FR-192	European_cohort_V2	33197	1566	390	0.00259457	0.0001896	5.00023e-05
FR-193	European_cohort_V2	40699	0	889	0.0031809	0	0.00011398
FR-194	European_cohort_V2	198448	1934	1132	0.01551	0.000234155	0.000145135
FR-195	European_cohort_V2	169146	1106	2511	0.0132199	0.000133907	0.000321938
FR-196	European_cohort_V2	91821	3230	810	0.00717643	0.000391066	0.000103851
FR-198	European_cohort_V2	85453	7662	137	0.00667873	0.000927661	1.75649e-05
FR-200	European_cohort_V2	38502	1508	513	0.00300919	0.000182578	6.57722e-05
FR-202	European_cohort_V2	203412	250	771	0.015898	3.02682e-05	9.88507e-05
FR-208	European_cohort_V2	71893	760	131	0.00561892	9.20154e-05	1.67956e-05
FR-211	European_cohort_V2	294269	1310	954	0.0229991	0.000158606	0.000122313
FR-212	European_cohort_V2	48667	58378	969	0.00380365	0.007068	0.000124236
FR-213	European_cohort_V2	104240	0	564	0.00814706	0	7.2311e-05
FR-214	European_cohort_V2	28263	248	0	0.00220894	3.00261e-05	0
FR-215	European_cohort_V2	18231	2046	583	0.00142488	0.000247715	7.4747e-05
FR-218	European_cohort_V2	191896	250	235	0.014998	3.02682e-05	3.01296e-05
FR-221	European_cohort_V2	49129	4652	2629	0.00383976	0.000563231	0.000337067
FR-223	European_cohort_V2	8361	5936	126	0.000653468	0.000718689	1.61546e-05
FR-229	European_cohort_V2	146691	1826	0	0.0114649	0.000221079	0
FR-241	European_cohort_V2	274692	0	140	0.021469	0	1.79495e-05
FR-249	European_cohort_V2	87574	998	381	0.0068445	0.000120831	4.88484e-05
FR-268	European_cohort_V2	17838	121476	0	0.00139416	0.0147075	0
FR-275	European_cohort_V2	59502	2786	139	0.00465048	0.000337309	1.78213e-05
FR-276	European_cohort_V2	51759	4110	5383	0.00404531	0.00049761	0.00069016
FR-281	European_cohort_V2	173242	556	1118	0.01354	6.73165e-05	0.00014334
FR-282	European_cohort_V2	212990	5656	134	0.0166466	0.000684789	1.71803e-05
FR-293	European_cohort_V2	111746	262	6997	0.0087337	3.17211e-05	0.000897093
FR-294	European_cohort_V2	93625	4162	279	0.00731742	0.000503905	3.57709e-05
FR-298	European_cohort_V2	138305	1634	2776	0.0108095	0.000197833	0.000355914
FR-302	European_cohort_V2	45305	2234	1806	0.00354089	0.000270477	0.000231549
FR-305	European_cohort_V2	46553	4048	440	0.00363843	0.000490103	5.64128e-05
FR-310	European_cohort_V2	41711	125110	557	0.00325999	0.0151474	7.14135e-05
FR-312	European_cohort_V2	310167	3496	1629	0.0242416	0.000423271	0.000208856
FR-316	European_cohort_V2	658299	1396	1406	0.0514505	0.000169018	0.000180265
FR-328	European_cohort_V2	44798	276	138	0.00350126	3.34161e-05	1.76931e-05
FR-344	European_cohort_V2	2607765	51338	138	0.203814	0.00621564	1.76931e-05
FR-349	European_cohort_V2	184647	3822	972	0.0144314	0.000462741	0.000124621
FR-376	European_cohort_V2	222977	746	246	0.0174271	9.03204e-05	3.15399e-05
FR-382	European_cohort_V2	114828	812	0	0.00897458	9.83112e-05	0
FR-390	European_cohort_V2	75866	3012	3474	0.00592944	0.000364672	0.000445405
FR-393	European_cohort_V2	38152	0	0	0.00298183	0	0
FR-398	European_cohort_V2	67020	792	539	0.00523806	9.58898e-05	6.91057e-05
FR-399	European_cohort_V2	92049	1644	3334	0.00719425	0.000199044	0.000427455
FR-400	European_cohort_V2	58419	2216	3087	0.00456584	0.000268298	0.000395787
FR-404	European_cohort_V2	3605687	34456	266	0.281809	0.00417169	3.41041e-05
FR-414	European_cohort_V2	62679	1586	392	0.00489878	0.000192022	5.02587e-05
FR-419	European_cohort_V2	256199	2706	128	0.0200237	0.000327623	1.6411e-05
FR-430	European_cohort_V2	1182595	816	132	0.0924277	9.87955e-05	1.69239e-05
FR-449	European_cohort_V2	31648	4232	786	0.0024735	0.000512381	0.000100774
FR-450	European_cohort_V2	325468	2316	8056	0.0254375	0.000280405	0.00103287
FR-451	European_cohort_V2	253139	5474	139	0.0197845	0.000662753	1.78213e-05
FR-459	European_cohort_V2	24324	1662	0	0.00190108	0.000201223	0
FR-460	European_cohort_V2	25120	1116	837	0.0019633	0.000135117	0.000107313
FR-473	European_cohort_V2	103942	0	4483	0.00812377	0	0.00057477
FR-474	European_cohort_V2	100921	1548	128	0.00788765	0.000187421	1.6411e-05
FR-495	European_cohort_V2	200898	6034	1788	0.0157015	0.000730554	0.000229241
FR-496	European_cohort_V2	465192	3710	403	0.0363579	0.00044918	5.1669e-05
FR-500	European_cohort_V2	103056	1332	401	0.00805452	0.000161269	5.14126e-05
FR-503	European_cohort_V2	25900	7146	268	0.00202426	0.000865187	3.43606e-05
FR-504	European_cohort_V2	97961	1032	1285	0.00765631	0.000124947	0.000164751
FR-505	European_cohort_V2	93274	832	0	0.00728999	0.000100733	0
FR-506	European_cohort_V2	62864	0	1612	0.00491324	0	0.000206676
FR-507	European_cohort_V2	48925	0	501	0.00382382	0	6.42337e-05
FR-510	European_cohort_V2	392642	1628	278	0.0306876	0.000197107	3.56427e-05
FR-539	European_cohort_V2	22372	12880	2313	0.00174852	0.00155942	0.000296552
FR-542	European_cohort_V2	65471	3280	1120	0.005117	0.000397119	0.000143596
FR-548	European_cohort_V2	39918	12398	0	0.00311986	0.00150106	0
FR-551	European_cohort_V2	71102	3162	268	0.0055571	0.000382833	3.43606e-05
FR-552	European_cohort_V2	114964	2694	136	0.00898521	0.00032617	1.74367e-05
FR-558	European_cohort_V2	48380	840	838	0.00378122	0.000101701	0.000107441
FR-568	European_cohort_V2	73123	2008	1011	0.00571505	0.000243114	0.000129621
FR-596	European_cohort_V2	86248	248	0	0.00674086	3.00261e-05	0
FR-606	European_cohort_V2	85969	822	1100	0.00671905	9.95219e-05	0.000141032
FR-617	European_cohort_V2	76613	2710	5188	0.00598782	0.000328108	0.000665159
FR-626	European_cohort_V2	49410	774	388	0.00386172	9.37104e-05	4.97459e-05
FR-628	European_cohort_V2	79015	2114	11736	0.00617555	0.000255948	0.00150468
FR-643	European_cohort_V2	12398	286	575	0.000968987	3.46269e-05	7.37213e-05
FR-652	European_cohort_V2	45978	2500	1273	0.00359349	0.000302682	0.000163213
FR-654	European_cohort_V2	40180	1088	3046	0.00314034	0.000131727	0.000390531
FR-664	European_cohort_V2	30384	2212	0	0.00237471	0.000267813	0
FR-666	European_cohort_V2	46077	254	806	0.00360123	3.07525e-05	0.000103338
FR-667	European_cohort_V2	61372	1356	1095	0.00479663	0.000164175	0.000140391
FR-672	European_cohort_V2	94860	3292	1794	0.00741395	0.000398572	0.000230011
FR-682	European_cohort_V2	8838	0	0	0.000690749	0	0
FR-684	European_cohort_V2	30996	808	1355	0.00242255	9.78269e-05	0.000173726
FR-696	European_cohort_V2	804840	0	0	0.0629037	0	0
FR-716	European_cohort_V2	100174	3514	3024	0.00782927	0.00042545	0.00038771
FR-719	European_cohort_V2	54355	530	822	0.00424821	6.41686e-05	0.000105389
FR-721	European_cohort_V2	13137	0	16239	0.00102674	0	0.00208202
FR-722	European_cohort_V2	54572	518	0	0.00426517	6.27158e-05	0
FR-723	European_cohort_V2	52424	11492	40780	0.00409729	0.00139137	0.00522845
FR-726	European_cohort_V2	57830	1096	3233	0.0045198	0.000132696	0.000414506
FR-728	European_cohort_V2	82296	1096	1518	0.00643199	0.000132696	0.000194624
FR-730	European_cohort_V2	10797	0	147	0.000843858	0	1.8847e-05
FR-734	European_cohort_V2	55810	996	504	0.00436193	0.000120589	6.46184e-05
FR-751	European_cohort_V2	75128	276	3617	0.00587176	3.34161e-05	0.000463739
FR-759	European_cohort_V2	42635	5456	17109	0.00333221	0.000660574	0.00219356
FR-767	European_cohort_V2	87095	9696	0	0.00680706	0.00117392	0
FR-768	European_cohort_V2	718987	14486	137	0.0561937	0.00175386	1.75649e-05
FR-770	European_cohort_V2	19241	5800	134	0.00150381	0.000702223	1.71803e-05
FR-772	European_cohort_V2	10421	13586	0	0.000814471	0.0016449	0
FR-780	European_cohort_V2	25613	808	1089	0.00200183	9.78269e-05	0.000139622
FR-783	European_cohort_V2	173183	822	1122	0.0135354	9.95219e-05	0.000143853
FR-788	European_cohort_V2	417158	2266	571	0.0326037	0.000274351	7.32085e-05
FR-790	European_cohort_V2	8855	0	264	0.000692078	0	3.38477e-05
FR-792	European_cohort_V2	244562	816	3026	0.0191142	9.87955e-05	0.000387967
FR-812	European_cohort_V2	62676	1902	1789	0.00489855	0.000230281	0.00022937
FR-815	European_cohort_V2	50294	808	15694	0.00393081	9.78269e-05	0.00201214
FR-817	European_cohort_V2	1444545	3340	0	0.112901	0.000404384	0
FR-820	European_cohort_V2	168362	542	536	0.0131586	6.56215e-05	6.87211e-05
FR-824	European_cohort_V2	3319460	0	684	0.259438	0	8.76963e-05
FR-825	European_cohort_V2	50563	2120	268	0.00395184	0.000256675	3.43606e-05
FR-826	European_cohort_V2	44054	9438	4936	0.00344312	0.00114269	0.00063285
FR-827	European_cohort_V2	19584	822	276	0.00153062	9.95219e-05	3.53862e-05
FR-828	European_cohort_V2	8375	12132	701	0.000654562	0.00146886	8.98759e-05
FR-829	European_cohort_V2	47839	276	274	0.00373894	3.34161e-05	3.51298e-05
FR-830	European_cohort_V2	15980	798	2003	0.00124894	9.66162e-05	0.000256807
FR-835	European_cohort_V2	75523	1100	275	0.00590263	0.00013318	3.5258e-05
FR-901	European_cohort_V2	373935	0	419	0.0292255	0	5.37204e-05
FR-902	European_cohort_V2	28754	0	2497	0.00224732	0	0.000320143
S1_001	Chinese_cohort_V1	198562	2708	8029	0.015519	0.000327866	0.00102941
S1_002	Chinese_cohort_V1	247446	3043	1504	0.0193396	0.000368425	0.000192829
S1_003	Chinese_cohort_V1	1891731	707	4515	0.147851	8.55986e-05	0.000578873
S1_004	Chinese_cohort_V1	249816	2061	4792	0.0195248	0.000249531	0.000614387
S1_005	Chinese_cohort_V1	1745012	2349762	34513	0.136384	0.284493	0.00442495
S1_006	Chinese_cohort_V1	583790	13677	2002	0.0456271	0.00165591	0.000256678
S1_007	Chinese_cohort_V1	158348	11970	602	0.012376	0.00144924	7.7183e-05
S1_008	Chinese_cohort_V1	1052225	19620	7192	0.0822384	0.00237545	0.000922094
S1_009	Chinese_cohort_V1	220533	734	22233	0.0172361	8.88675e-05	0.00285052
S1_010	Chinese_cohort_V1	171268	10883	4723	0.0133857	0.00131764	0.000605541
S1_011	Chinese_cohort_V1	261004	14449	301	0.0203992	0.00174938	3.85915e-05
S1_012_merged	Chinese_cohort_V1	270163	5336	3268	0.0211151	0.000646045	0.000418994
S1_013	Chinese_cohort_V1	1173312	4331	15920	0.0917022	0.000524367	0.00204112
S1_014	Chinese_cohort_V1	30016	602	602	0.00234595	7.28859e-05	7.7183e-05
S1_015	Chinese_cohort_V1	2366046	1790	903	0.184922	0.000216721	0.000115775
S1_016	Chinese_cohort_V1	322734	4211	14400	0.0252238	0.000509838	0.00184624
S1_017	Chinese_cohort_V1	504904	13944	1502	0.0394616	0.00168824	0.000192573
S1_018	Chinese_cohort_V1	40581	0	2101	0.00317168	0	0.000269371
S1_019	Chinese_cohort_V1	130706	7019	21859	0.0102156	0.000849811	0.00280256
S1_020	Chinese_cohort_V1	346405	18855	6318	0.0270739	0.00228283	0.000810037
S1_021	Chinese_cohort_V1	480839	600	119960	0.0375808	7.26438e-05	0.0153802
S1_022	Chinese_cohort_V1	1005545	4428	1806	0.0785901	0.000536111	0.000231549
S1_023	Chinese_cohort_V1	388858	602	2674	0.0303919	7.28859e-05	0.000342836
S1_024_merged	Chinese_cohort_V1	1175285	8130	5316	0.0918564	0.000984323	0.00068157
S1_025	Chinese_cohort_V1	199502	4569	3085	0.0155924	0.000553182	0.000395531
S1_026	Chinese_cohort_V1	110500	2408	991	0.00863632	0.000291544	0.000127057
S1_027	Chinese_cohort_V1	204776	2887	5835	0.0160046	0.000349537	0.000748111
S1_028	Chinese_cohort_V1	1419594	901	0	0.110951	0.000109087	0
S1_029	Chinese_cohort_V1	114443	417	17406	0.00894449	5.04874e-05	0.00223164
S1_030	Chinese_cohort_V1	370253	99302	1184	0.0289378	0.0120228	0.000151802
S1_031	Chinese_cohort_V1	164177	901	253	0.0128315	0.000109087	3.24374e-05
S1_032	Chinese_cohort_V1	217212	2355	8423	0.0169766	0.000285127	0.00107992
S1_033	Chinese_cohort_V1	467718	42557	2911	0.0365553	0.0051525	0.000373222
S1_034	Chinese_cohort_V1	331255	8213	2107	0.0258898	0.000994372	0.000270141
S1_035	Chinese_cohort_V1	2153502	570	5117	0.168311	6.90116e-05	0.000656056
S1_036	Chinese_cohort_V1	391321	12491	16838	0.0305844	0.00151232	0.00215882
S1_037	Chinese_cohort_V1	1160528	3820	903	0.0907031	0.000462499	0.000115775
S1_038	Chinese_cohort_V1	2417739	5496	3310	0.188963	0.000665417	0.000424379
S1_039	Chinese_cohort_V1	567609	5321	1199	0.0443625	0.000644229	0.000153725
S1_040	Chinese_cohort_V1	471239	2102	6620	0.0368305	0.000254495	0.000848757
S1_041	Chinese_cohort_V1	342282	15534	11034	0.0267516	0.00188075	0.00141468
S1_042	Chinese_cohort_V1	186283	9331	24267	0.0145593	0.00112973	0.0031113
S1_043	Chinese_cohort_V1	215028	880	1203	0.0168059	0.000106544	0.000154238
S1_045	Chinese_cohort_V1	34886	2331	9026	0.00272658	0.000282221	0.00115723
S1_047	Chinese_cohort_V1	1997277	2684	1505	0.156101	0.00032496	0.000192958
S1_048	Chinese_cohort_V1	273947	49592	7218	0.0214108	0.00600425	0.000925427
S1_049	Chinese_cohort_V1	2120627	16892	20940	0.165741	0.00204516	0.00268474
S1_050	Chinese_cohort_V1	509590	903	460	0.0398279	0.000109329	5.89771e-05
S1_051	Chinese_cohort_V1	151745	1387	5662	0.0118599	0.000167928	0.000725931
S1_052	Chinese_cohort_V1	227263	6515	4154	0.0177621	0.00078879	0.000532589
S1_053	Chinese_cohort_V1	133428	3899	903	0.0104283	0.000472063	0.000115775
S1_054	Chinese_cohort_V1	241678	6600	17147	0.0188888	0.000799081	0.00219843
S1_057	Chinese_cohort_V1	246798	28738	6919	0.0192889	0.00347939	0.000887092
S1_058	Chinese_cohort_V1	580162	24919	2106	0.0453436	0.00301702	0.000270012
S1_060_merged	Chinese_cohort_V1	1757473	3882	13426	0.137358	0.000470005	0.00172136
S1_061	Chinese_cohort_V1	1501206	1806	203	0.117329	0.000218658	2.60268e-05
S1_062_merged	Chinese_cohort_V1	202144	5324	3309	0.0157989	0.000644592	0.00042425
S1_064	Chinese_cohort_V1	397822	2407	22434	0.0310925	0.000291423	0.00287629
S1_065	Chinese_cohort_V1	277093	564	1504	0.0216567	6.82851e-05	0.000192829
S1_066	Chinese_cohort_V1	275379	23902	301	0.0215227	0.00289389	3.85915e-05
S1_067	Chinese_cohort_V1	7939747	15800	13840	0.620545	0.00191295	0.00177444
S1_068	Chinese_cohort_V1	383354	41189	19685	0.0299617	0.00498687	0.00252383
S1_069	Chinese_cohort_V1	903	0	0	7.05755e-05	0	0
S1_070	Chinese_cohort_V1	316568	1806	7668	0.0247419	0.000218658	0.000983122
S1_071	Chinese_cohort_V1	326661	1190	2107	0.0255308	0.000144077	0.000270141
S1_072	Chinese_cohort_V1	87998	11541	5117	0.00687763	0.0013973	0.000656056
S1_073	Chinese_cohort_V1	380847	4788	40037	0.0297658	0.000579697	0.00513318
S1_074	Chinese_cohort_V1	376442	3245	30993	0.0294215	0.000392882	0.00397364
S1_075	Chinese_cohort_V1	626428	3833	7387	0.0489596	0.000464073	0.000947095
S1_077	Chinese_cohort_V1	267188	2613	5414	0.0208825	0.000316364	0.000694134
S1_078	Chinese_cohort_V1	103813	1806	3574	0.00811368	0.000218658	0.000458226
S1_079	Chinese_cohort_V1	724588	2582	1806	0.0566314	0.00031261	0.000231549
S1_081	Chinese_cohort_V1	575895	19195	2407	0.0450101	0.00232399	0.000308604
S1_083	Chinese_cohort_V1	257584	5585	18358	0.0201319	0.000676192	0.0023537
S1_084	Chinese_cohort_V1	183033	4179	2405	0.0143053	0.000505964	0.000308348
S1_086	Chinese_cohort_V1	190636	300	1637	0.0148995	3.63219e-05	0.000209881
S1_087	Chinese_cohort_V1	326732	3175	5699	0.0255363	0.000384407	0.000730675
S1_088	Chinese_cohort_V1	527256	3574	2319	0.0412086	0.000432715	0.000297321
S1_089	Chinese_cohort_V1	538031	2105	12339	0.0420507	0.000254859	0.001582
S1_089-2	Chinese_cohort_V1	186440	602	285	0.0145715	7.28859e-05	3.65401e-05
S1_091	Chinese_cohort_V1	286059	13384	18652	0.0223574	0.00162044	0.00239139
S1_092	Chinese_cohort_V1	3539963	5467	301	0.276672	0.000661906	3.85915e-05
S1_093	Chinese_cohort_V1	292914	6803	2389	0.0228932	0.000823659	0.000306296
S1_094	Chinese_cohort_V1	350444	902	6266	0.0273896	0.000109208	0.00080337
S1_095	Chinese_cohort_V1	403200	2406	7156	0.0315128	0.000291302	0.000917478
S1_097	Chinese_cohort_V1	322073	26954	16169	0.0251722	0.0032634	0.00207304
S1_098	Chinese_cohort_V1	1188458	2901	4814	0.092886	0.000351233	0.000617208
S1_100_merged	Chinese_cohort_V1	145034	9012	5988	0.0113354	0.00109111	0.000767728
S1_102	Chinese_cohort_V1	332220	3689	44027	0.0259652	0.000446638	0.00564475
S1_105	Chinese_cohort_V1	465895	602	13529	0.0364128	7.28859e-05	0.00173457
S1_106	Chinese_cohort_V1	692610	1804	13531	0.0541321	0.000218416	0.00173482
S1_107	Chinese_cohort_V1	1180531	2835	18394	0.0922664	0.000343242	0.00235831
S1_108	Chinese_cohort_V1	1630925	2604	857	0.127468	0.000315274	0.000109877
S1_109	Chinese_cohort_V1	476814	10807	9599	0.0372662	0.00130844	0.0012307
S1_110	Chinese_cohort_V1	659761	11731	32619	0.0515648	0.00142031	0.00418212
S1_111	Chinese_cohort_V1	738943	3166	15308	0.0577534	0.000383317	0.00196265
S1_112	Chinese_cohort_V1	246975	892	1503	0.0193028	0.000107997	0.000192701
S1_113	Chinese_cohort_V1	129908	903	33577	0.0101532	0.000109329	0.00430494
S1_114	Chinese_cohort_V1	98628	901	497547	0.00770844	0.000109087	0.063791
S1_115	Chinese_cohort_V1	349794	14942	7504	0.0273387	0.00180907	0.000962095
S1_116	Chinese_cohort_V1	301492	602	7498	0.0235636	7.28859e-05	0.000961326
S1_118	Chinese_cohort_V1	154582	3283	830	0.0120816	0.000397482	0.000106415
S1_120	Chinese_cohort_V1	1116679	34679	3610	0.087276	0.00419869	0.000462842
S1_121	Chinese_cohort_V1	589654	19182	66738	0.0460854	0.00232242	0.00855655
S1_122	Chinese_cohort_V1	334922	1204	1504	0.0261764	0.000145772	0.000192829
S1_123	Chinese_cohort_V1	196399	6225	12861	0.0153499	0.000753679	0.00164892
S1_124	Chinese_cohort_V1	172587	300	2106	0.0134888	3.63219e-05	0.000270012
S1_125	Chinese_cohort_V1	832196	8636	33870	0.0650417	0.00104559	0.00434251
S1_126	Chinese_cohort_V1	309478	9929	16787	0.0241878	0.00120213	0.00215228
S1_127	Chinese_cohort_V1	584505	13620	15345	0.045683	0.00164901	0.0019674
S1_128	Chinese_cohort_V1	1907284	4381	16973	0.149067	0.000530421	0.00217613
S1_130	Chinese_cohort_V1	322629	3912	3544	0.0252156	0.000473637	0.00045438
S1_132	Chinese_cohort_V1	233706	903	10534	0.0182657	0.000109329	0.00135057
S2_003	Chinese_cohort_V1	78341	2262	4812	0.00612288	0.000273867	0.000616951
S2_004	Chinese_cohort_V1	376837	4583	10909	0.0294523	0.000554877	0.00139865
S2_005	Chinese_cohort_V1	396969	7886	13598	0.0310258	0.000954781	0.00174341
S2_006	Chinese_cohort_V1	597497	5870	12407	0.0466984	0.000710698	0.00159071
S2_007	Chinese_cohort_V1	318393	1432	6259	0.0248846	0.000173376	0.000802473
S2_009	Chinese_cohort_V1	397000	602	6015	0.0310282	7.28859e-05	0.000771189
S2_010	Chinese_cohort_V1	140704	602	1504	0.010997	7.28859e-05	0.000192829
S2_011_merged	Chinese_cohort_V1	233662	2070	7821	0.0182623	0.000250621	0.00100274
S2_012_merged	Chinese_cohort_V1	368339	5821	6621	0.0287882	0.000704765	0.000848885
S2_013	Chinese_cohort_V1	212269	16213	5361	0.0165902	0.00196296	0.000687339
S2_014	Chinese_cohort_V1	197707	5115	37124	0.0154521	0.000619288	0.00475971
S2_015	Chinese_cohort_V1	143454	2997	4214	0.0112119	0.000362856	0.000540281
S2_016_merged	Chinese_cohort_V1	492541	7119	34494	0.0384954	0.000861918	0.00442251
S2_017	Chinese_cohort_V1	312338	10232	12681	0.0244113	0.00123882	0.00162584
S2_018	Chinese_cohort_V1	1843453	54441	8725	0.144078	0.00659133	0.00111864
S2_019	Chinese_cohort_V1	320054	9810	5925	0.0250144	0.00118773	0.00075965
S2_020_merged	Chinese_cohort_V1	341792	19372	7824	0.0267133	0.00234542	0.00100312
S2_021	Chinese_cohort_V1	340059	8313	7119	0.0265779	0.00100648	0.000912734
S2_022_merged	Chinese_cohort_V1	336925	5927	2709	0.026333	0.000717599	0.000347324
S2_024	Chinese_cohort_V1	485394	165713	1476	0.0379368	0.0200634	0.000189239
S2_025_merged	Chinese_cohort_V1	53939	5315	7523	0.0042157	0.000643503	0.000964531
S2_026	Chinese_cohort_V1	386393	12619	2708	0.0301992	0.00152782	0.000347195
S2_027	Chinese_cohort_V1	376822	14085	903	0.0294512	0.00170531	0.000115775
S2_027-2	Chinese_cohort_V1	483604	2134	10833	0.0377969	0.00025837	0.00138891
S2_028	Chinese_cohort_V1	527408	10510	0	0.0412205	0.00127248	0
S2_030	Chinese_cohort_V1	1096639	19085	2107	0.0857097	0.00231068	0.000270141
S2_031	Chinese_cohort_V1	179786	2340	1504	0.0140515	0.000283311	0.000192829
S2_032	Chinese_cohort_V1	1513782	2359	602	0.118312	0.000285611	7.7183e-05
S2_033	Chinese_cohort_V1	776396	1804	1503	0.0606806	0.000218416	0.000192701
S2_035	Chinese_cohort_V1	186155	7920	11341	0.0145493	0.000958898	0.00145404
S2_036	Chinese_cohort_V1	165874	3571	18230	0.0129642	0.000432351	0.00233729
S2_037	Chinese_cohort_V1	788556	12287	5701	0.0616309	0.00148762	0.000730931
S2_038	Chinese_cohort_V1	518366	8272	10832	0.0405138	0.00100152	0.00138878
S2_039_merged	Chinese_cohort_V1	179834	6841	4445	0.0140552	0.00082826	0.000569898
S2_040	Chinese_cohort_V1	241452	34146	4601	0.0188711	0.00413416	0.000589899
S2_043	Chinese_cohort_V1	77412	1305	4816	0.00605027	0.000158	0.000617464
S2_044	Chinese_cohort_V1	474847	27938	37912	0.0371125	0.00338254	0.00486074
S2_045	Chinese_cohort_V1	316447	20664	6599	0.0247325	0.00250185	0.000846064
S2_046_merged	Chinese_cohort_V1	773075	4168	894	0.060421	0.000504632	0.000114621
S2_047	Chinese_cohort_V1	76894	3009	18355	0.00600978	0.000364308	0.00235331
S2_048	Chinese_cohort_V1	16672	5663	903	0.00130303	0.000685636	0.000115775
S2_050_merged	Chinese_cohort_V1	70467	12860	4171	0.00550747	0.001557	0.000534768
S2_051	Chinese_cohort_V1	761471	884	2106	0.0595141	0.000107029	0.000270012
S2_052	Chinese_cohort_V1	1617444	2287	81100	0.126414	0.000276894	0.0103979
S2_053	Chinese_cohort_V1	49493	10429	7779	0.00386821	0.00126267	0.000997354
S2_054	Chinese_cohort_V1	663664	22704	7220	0.0518698	0.00274884	0.000925684
S2_055	Chinese_cohort_V1	41340	832	903	0.003231	0.000100733	0.000115775
S2_057_merged	Chinese_cohort_V1	39775	7015	8915	0.00310868	0.000849327	0.001143
S2_058	Chinese_cohort_V1	317165	13026	25264	0.0247886	0.0015771	0.00323912
S2_059	Chinese_cohort_V1	32487	1127	3885	0.00253908	0.000136449	0.0004981
S2_060	Chinese_cohort_V1	1131763	23407	602	0.0884549	0.00283395	7.7183e-05
S2_061	Chinese_cohort_V1	89020	17981	4768	0.00695751	0.00217701	0.00061131
S2_062_merged	Chinese_cohort_V1	181284	3611	19745	0.0141686	0.000437194	0.00253153
S2_063	Chinese_cohort_V1	9399	3902	301	0.000734595	0.000472426	3.85915e-05
S2_064	Chinese_cohort_V1	101444	45518	12039	0.00792853	0.005511	0.00154353
S3_002	Chinese_cohort_V1	1716107	29405	602	0.134125	0.00356015	7.7183e-05
S3_005	Chinese_cohort_V1	1933394	50210	104144	0.151108	0.00607907	0.0133524
S3_007	Chinese_cohort_V1	97878	8673	856	0.00764982	0.00105007	0.000109749
S3_008	Chinese_cohort_V1	381267	12640	3289	0.0297986	0.00153036	0.000421686
S3_009	Chinese_cohort_V1	105338	3293	301	0.00823287	0.000398693	3.85915e-05
S3_010	Chinese_cohort_V1	217311	30024	7704	0.0169843	0.00363509	0.000987738
S3_011	Chinese_cohort_V1	232362	4957	11617	0.0181607	0.000600159	0.00148943
S3_013	Chinese_cohort_V1	306459	10960	0	0.0239518	0.00132696	0
S3_014	Chinese_cohort_V1	203925	3831	3609	0.0159381	0.00046383	0.000462714
S3_016	Chinese_cohort_V1	981458	5110	0	0.0767075	0.000618683	0
S3_021	Chinese_cohort_V1	2111332	10661	204	0.165015	0.00129076	2.6155e-05
S3_022	Chinese_cohort_V1	367027	5613	8247	0.0286856	0.000679582	0.00105736
S3_023	Chinese_cohort_V1	419414	4719	300	0.03278	0.000571343	3.84633e-05
S3_024	Chinese_cohort_V1	505279	1803	13907	0.0394909	0.000218294	0.00178303
S3_026	Chinese_cohort_V1	291430	18737	1450	0.0227772	0.00226854	0.000185906
S3_027	Chinese_cohort_V1	882650	3910	13783	0.068985	0.000473395	0.00176713
S3_028	Chinese_cohort_V1	476773	8941	28413	0.037263	0.00108251	0.00364286
S3_029	Chinese_cohort_V1	97342	6294	4210	0.00760793	0.000762033	0.000539768
S3_030	Chinese_cohort_V1	204476	11249	602	0.0159812	0.00136195	7.7183e-05
S3_031	Chinese_cohort_V1	469394	19571	11208	0.0366863	0.00236952	0.00143699
S3_033	Chinese_cohort_V1	505856	11316	4365	0.039536	0.00137006	0.000559641
S3_034	Chinese_cohort_V1	833715	13838	16317	0.0651604	0.00167541	0.00209202
S3_035	Chinese_cohort_V1	276472	4400	102120	0.0216081	0.000532721	0.0130929
S3_036	Chinese_cohort_V1	369660	1764	36215	0.0288914	0.000213573	0.00464316
S3_037	Chinese_cohort_V1	215419	2286	38259	0.0168364	0.000276773	0.00490523
S3_038	Chinese_cohort_V1	747628	300	1122	0.0584321	3.63219e-05	0.000143853
S3_039	Chinese_cohort_V1	1078348	2609	23379	0.0842801	0.000315879	0.00299745
S3_040	Chinese_cohort_V1	487666	5436	27279	0.0381144	0.000658152	0.00349747
S3_041	Chinese_cohort_V1	392476	529	9615	0.0306746	6.40476e-05	0.00123275
S3_043	Chinese_cohort_V1	555143	1388	3827	0.0433882	0.000168049	0.000490663
S3_044	Chinese_cohort_V1	315170	7112	28370	0.0246327	0.000861071	0.00363735
S3_045	Chinese_cohort_V1	404186	3793	12588	0.0315898	0.00045923	0.00161392
S3_046	Chinese_cohort_V1	3403249	5621	602	0.265987	0.000680551	7.7183e-05
S3_047	Chinese_cohort_V1	185766	3115	6535	0.0145189	0.000377142	0.000837859
S3_048	Chinese_cohort_V1	1163257	902	37655	0.0909163	0.000109208	0.00482779
S3_049	Chinese_cohort_V1	267663	9225	13505	0.0209197	0.0011169	0.00173149
S3_050	Chinese_cohort_V1	530631	10274	3309	0.0414724	0.0012439	0.00042425
S3_051	Chinese_cohort_V1	427871	5511	186	0.033441	0.000667233	2.38472e-05
S3_055	Chinese_cohort_V1	556135	13389	301	0.0434657	0.00162105	3.85915e-05
S3_057	Chinese_cohort_V1	108542	7600	3913	0.00848329	0.000920154	0.00050169
S3_058	Chinese_cohort_V1	279925	70714	15849	0.021878	0.00856155	0.00203202
S3_059	Chinese_cohort_V1	438049	7301	18838	0.0342365	0.000883953	0.00241524
S3_061_merged	Chinese_cohort_V1	608149	15709883	2407	0.0475309	1.90204	0.000308604
S3_062	Chinese_cohort_V1	141411	5416	602	0.0110522	0.000655731	7.7183e-05
S3_063	Chinese_cohort_V1	1656438	3310	1717	0.129462	0.000400751	0.000220138
S3_064	Chinese_cohort_V1	284060	5116	27349	0.0222012	0.000619409	0.00350644
S3_065	Chinese_cohort_V1	378465	4962	14285	0.0295796	0.000600764	0.00183149
S3_066	Chinese_cohort_V1	313768	1504	23229	0.0245231	0.000182094	0.00297821
S3_067	Chinese_cohort_V1	535404	7717	10030	0.0418454	0.00093432	0.00128596
S3_068	Chinese_cohort_V1	538326	10683	24215	0.0420738	0.00129342	0.00310463
S3_069	Chinese_cohort_V1	1073670	4080	8101	0.0839145	0.000493977	0.00103864
S3_070	Chinese_cohort_V1	1431336	16746	14286	0.111869	0.00202749	0.00183162
S3_071	Chinese_cohort_V1	292643	9282	13975	0.022872	0.0011238	0.00179175
S3_072	Chinese_cohort_V1	1510457	5062	14293	0.118052	0.000612871	0.00183252
S3_073	Chinese_cohort_V1	160237	4312	2708	0.0125236	0.000522066	0.000347195
S3_075	Chinese_cohort_V1	415787	2397	2107	0.0324965	0.000290212	0.000270141
S3_076	Chinese_cohort_V1	1477542	4422	24244	0.11548	0.000535385	0.00310835
S3_077	Chinese_cohort_V1	2018395	7522	46476	0.157751	0.00091071	0.00595873
S3_078	Chinese_cohort_V1	265823	7414	3910	0.0207759	0.000897635	0.000501305
S3_080	Chinese_cohort_V1	252346	4957	4514	0.0197225	0.000600159	0.000578745
S3_081	Chinese_cohort_V1	376730	10440	12338	0.029444	0.001264	0.00158187
S3_082	Chinese_cohort_V1	457463	12898	27427	0.0357538	0.0015616	0.00351644
S3_083	Chinese_cohort_V1	729230	8922	4141	0.0569942	0.00108021	0.000530922
S3_085	Chinese_cohort_V1	641194	301	28431	0.0501136	3.6443e-05	0.00364517
S3_086	Chinese_cohort_V1	260280	524	26773	0.0203426	6.34422e-05	0.00343259
S3_087	Chinese_cohort_V1	275610	87531	3280	0.0215408	0.0105976	0.000420532
S3_088	Chinese_cohort_V1	612893	3311	8166	0.0479017	0.000400872	0.00104697
S3_089	Chinese_cohort_V1	1105875	1770	11663	0.0864316	0.000214299	0.00149533
S3_090	Chinese_cohort_V1	162611	14310	5874	0.0127091	0.00173255	0.000753111
S3_091	Chinese_cohort_V1	299735	1502	6252	0.0234263	0.000181851	0.000801575
S3_092	Chinese_cohort_V1	359539	902	602	0.0281004	0.000109208	7.7183e-05
S3_094	Chinese_cohort_V1	520886	0	55600	0.0407107	0	0.00712853
S3_095	Chinese_cohort_V1	378417	12376	9930	0.0295758	0.0014984	0.00127314
S3_096	Chinese_cohort_V1	1082399	8117	12883	0.0845967	0.000982749	0.00165174
S3_097	Chinese_cohort_V1	1531066	7549	53835	0.119663	0.00091398	0.00690224
S3_098	Chinese_cohort_V1	1120408	3311	57853	0.0875674	0.000400872	0.00741739
S3_099_merged	Chinese_cohort_V1	843143	8265	9397	0.0658973	0.00100067	0.0012048
S3_100	Chinese_cohort_V1	2197052	13637	3010	0.171714	0.00165107	0.000385915
S3_101	Chinese_cohort_V1	301	0	0	2.35252e-05	0	0
S3_102	Chinese_cohort_V1	931328	4067	5881	0.0727895	0.000492404	0.000754009
S3_103	Chinese_cohort_V1	319857	6488	8422	0.024999	0.000785521	0.00107979
S3_104	Chinese_cohort_V1	141501	2513	49509	0.0110593	0.000304256	0.0063476
S3_105	Chinese_cohort_V1	815156	5417	14720	0.0637099	0.000655852	0.00188727
S3_106	Chinese_cohort_V1	0	0	0	0	0	0
S3_107	Chinese_cohort_V1	580458	1106	25576	0.0453667	0.000133907	0.00327912
S3_108	Chinese_cohort_V1	1514937	22946	16109	0.118402	0.00277814	0.00206535
S3_109	Chinese_cohort_V1	470534	3890	25854	0.0367754	0.000470974	0.00331477
S3_110	Chinese_cohort_V1	120846	2519	1797	0.00944493	0.000304983	0.000230395
S3_111	Chinese_cohort_V1	1037062	3274	27908	0.0810534	0.000396393	0.00357811
S3_112	Chinese_cohort_V1	2168341	1204	8813	0.16947	0.000145772	0.00112992
S3_113	Chinese_cohort_V1	169545	24323	3877	0.0132511	0.00294486	0.000497074
S4_001	Chinese_cohort_V1	0	0	0	0	0	0
S4_002	Chinese_cohort_V1	114382	3485	0	0.00893972	0.000421939	0
S4_003	Chinese_cohort_V1	862023	7358	3005	0.0673729	0.000890855	0.000385274
S4_004	Chinese_cohort_V1	269972	4816	5397	0.0211001	0.000583087	0.000691955
S4_005	Chinese_cohort_V1	1805978	15065	9779	0.141149	0.00182396	0.00125378
S4_006	Chinese_cohort_V1	486625	3837	581	0.038033	0.000464557	7.44906e-05
S4_007	Chinese_cohort_V1	329617	13995	9459	0.0257618	0.00169442	0.00121275
S4_008	Chinese_cohort_V1	1061673	11563	25314	0.0829769	0.00139997	0.00324553
S4_010	Chinese_cohort_V1	312516	2706	10417	0.0244252	0.000327623	0.00133557
S4_011	Chinese_cohort_V1	234906	3311	8388	0.0183595	0.000400872	0.00107543
S4_012	Chinese_cohort_V1	257661	1203	3909	0.0201379	0.000145651	0.000501177
S4_013	Chinese_cohort_V1	145239	602	1503	0.0113514	7.28859e-05	0.000192701
S4_014	Chinese_cohort_V1	718315	300	6304	0.0561411	3.63219e-05	0.000808242
S4_015	Chinese_cohort_V1	275081	1401	2693	0.0214994	0.000169623	0.000345272
S4_017	Chinese_cohort_V1	1652841	9515	846	0.129181	0.00115201	0.000108466
S4_018_merged	Chinese_cohort_V1	96612	12262	14077	0.00755088	0.0014846	0.00180483
S4_019	Chinese_cohort_V1	379157	4925	36805	0.0296337	0.000596284	0.00471881
S4_020	Chinese_cohort_V1	491079	19797	4477	0.0383811	0.00239688	0.000574001
S4_021	Chinese_cohort_V1	102913	4878	1505	0.00804334	0.000590594	0.000192958
S4_022	Chinese_cohort_V1	2280720	69822	7381	0.178254	0.00845355	0.000946325
S4_023	Chinese_cohort_V1	204002	301	903	0.0159441	3.6443e-05	0.000115775
S4_025	Chinese_cohort_V1	157090	2406	3308	0.0122776	0.000291302	0.000424122
S4_026	Chinese_cohort_V1	3163116	5944	5679	0.247219	0.000719658	0.00072811
S4_027	Chinese_cohort_V1	276888	13743	6253	0.0216407	0.00166391	0.000801704
S4_028	Chinese_cohort_V1	301	0	0	2.35252e-05	0	0
S4_029	Chinese_cohort_V1	0	0	0	0	0	0
S4_031	Chinese_cohort_V1	82427	602	602	0.00644222	7.28859e-05	7.7183e-05
S4_032	Chinese_cohort_V1	183544	2228	2696	0.0143452	0.00026975	0.000345657
S4_033	Chinese_cohort_V1	238469	9604	24286	0.018638	0.00116278	0.00311373
S4_034_merged	Chinese_cohort_V1	252470	4745	3552	0.0197322	0.000574491	0.000455405
S4_035	Chinese_cohort_V1	193662	1503	1382	0.015136	0.000181973	0.000177188
S4_037	Chinese_cohort_V1	101771	5162	11738	0.00795409	0.000624978	0.00150494
S4_038	Chinese_cohort_V1	1265990	3611	7432	0.0989456	0.000437194	0.000952864
S4_040	Chinese_cohort_V1	350628	8107	17637	0.0274039	0.000981538	0.00226126
S4_041	Chinese_cohort_V1	117660	6849	0	0.00919592	0.000829228	0
S4_042	Chinese_cohort_V1	180237	3276	3008	0.0140867	0.000396635	0.000385659
S4_043	Chinese_cohort_V1	252837	1500	2407	0.0197609	0.000181609	0.000308604
S4_044	Chinese_cohort_V1	238041	5280	2679	0.0186045	0.000639265	0.000343477
S4_045	Chinese_cohort_V1	232606	3517	15039	0.0181797	0.000425813	0.00192817
S4_046	Chinese_cohort_V1	249957	7486	2388	0.0195358	0.000906352	0.000306168
S4_047	Chinese_cohort_V1	508961	13232	7149	0.0397787	0.00160204	0.000916581
S4_048	Chinese_cohort_V1	628092	4220	301	0.0490896	0.000510928	3.85915e-05
S4_049	Chinese_cohort_V1	298462	3882	35366	0.0233268	0.000470005	0.00453431
S4_050	Chinese_cohort_V1	1140167	42167	1420	0.0891117	0.00510528	0.00018206
S4_051	Chinese_cohort_V1	157923	2017	28423	0.0123427	0.000244204	0.00364414
S4_052	Chinese_cohort_V1	1908261	7941	301	0.149143	0.00096144	3.85915e-05
S4_053	Chinese_cohort_V1	91262	19328	2107	0.00713274	0.0023401	0.000270141
S4_054	Chinese_cohort_V1	1086836	34423	13784	0.0849435	0.00416769	0.00176726
S5_002	Chinese_cohort_V1	183834	17541	36394	0.0143679	0.00212374	0.00466611
S5_003	Chinese_cohort_V1	263378	1110	1504	0.0205848	0.000134391	0.000192829
S5_006	Chinese_cohort_V1	393640	87898	857	0.0307656	0.0106421	0.000109877
S5_007	Chinese_cohort_V1	420571	2705	22449	0.0328704	0.000327502	0.00287821
S5_008	Chinese_cohort_V1	473024	23969	97183	0.03697	0.002902	0.0124599
S5_009	Chinese_cohort_V1	930642	2060	5965	0.0727359	0.00024941	0.000764779
S5_010	Chinese_cohort_V1	347397	7115	299	0.0271514	0.000861434	3.83351e-05
S5_011	Chinese_cohort_V1	540187	3010	11734	0.0422192	0.000364429	0.00150443
S5_012_merged	Chinese_cohort_V1	177185	7374	809	0.0138482	0.000892792	0.000103723
S5_013	Chinese_cohort_V1	246866	2641	17006	0.0192942	0.000319754	0.00218036
S5_014	Chinese_cohort_V1	180170	1204	2107	0.0140815	0.000145772	0.000270141
S5_015	Chinese_cohort_V1	258781	18652	8625	0.0202255	0.00225825	0.00110582
S5_016	Chinese_cohort_V1	183441	2606	0	0.0143371	0.000315516	0
S5_017	Chinese_cohort_V1	157581	15574	3539	0.012316	0.00188559	0.000453739
S5_018	Chinese_cohort_V1	209420	5122	602	0.0163676	0.000620136	7.7183e-05
S5_019	Chinese_cohort_V1	183358	2355	1204	0.0143307	0.000285127	0.000154366
S5_020	Chinese_cohort_V1	1061115	3748	4165	0.0829333	0.000453781	0.000533999
S5_021	Chinese_cohort_V1	183709	24218	14520	0.0143581	0.00293214	0.00186162
S5_022	Chinese_cohort_V1	2224462	3337	602	0.173857	0.00040402	7.7183e-05
S5_023	Chinese_cohort_V1	246340	4157	6281	0.0192531	0.0005033	0.000805293
S5_024	Chinese_cohort_V1	248137	65845	20009	0.0193936	0.00797205	0.00256537
S5_025	Chinese_cohort_V1	221827	1204	2255	0.0173373	0.000145772	0.000289116
S5_026	Chinese_cohort_V1	268285	2107	3562	0.0209683	0.000255101	0.000456688
S5_027	Chinese_cohort_V1	340374	3489	17291	0.0266025	0.000422423	0.0022169
S5_028	Chinese_cohort_V1	153476	1756	1505	0.0119952	0.000212604	0.000192958
S5_029	Chinese_cohort_V1	415696	6020	27089	0.0324894	0.000728859	0.00347311
S5_030	Chinese_cohort_V1	1513917	2937860	16546	0.118323	0.355695	0.00212138
S5_031	Chinese_cohort_V1	143194	602	301	0.0111916	7.28859e-05	3.85915e-05
S5_032	Chinese_cohort_V1	476634	3871	6315	0.0372521	0.000468673	0.000809652
S5_034	Chinese_cohort_V1	195302	104390	2709	0.0152642	0.0126388	0.000347324
S5_035	Chinese_cohort_V1	863993	892	15048	0.0675269	0.000107997	0.00192932
S5_037	Chinese_cohort_V1	691472	4512	773	0.0540432	0.000546281	9.91071e-05
S5_038	Chinese_cohort_V1	204693	21394	602	0.0159981	0.00259023	7.7183e-05
S5_039	Chinese_cohort_V1	1321216	181048	14391	0.103262	0.02192	0.00184508
S5_040	Chinese_cohort_V1	233693	1806	7756	0.0182647	0.000218658	0.000994405
S5_041	Chinese_cohort_V1	267090	13374	6318	0.0208749	0.00161923	0.000810037
S5_042	Chinese_cohort_V1	606092	10572	36277	0.0473702	0.00127998	0.00465111
S5_043	Chinese_cohort_V1	1540376	3211	79214	0.120391	0.000388765	0.0101561
S5_045	Chinese_cohort_V1	389185	60735	5880	0.0304174	0.00735336	0.000753881
S5_047	Chinese_cohort_V1	213426	140637	12640	0.0166807	0.0170273	0.00162059
S5_052	Chinese_cohort_V1	807783	720499	14601	0.0631337	0.0872329	0.00187201
S5_054	Chinese_cohort_V1	335561	602	18346	0.0262263	7.28859e-05	0.00235216
S5_055	Chinese_cohort_V1	235102	1806	0	0.0183748	0.000218658	0
S5_055-2	Chinese_cohort_V1	161237	1806	1806	0.0126018	0.000218658	0.000231549
S5_056	Chinese_cohort_V1	548269	33640	10802	0.0428509	0.00407289	0.00138494
S5_057	Chinese_cohort_V1	1278385	13735	4816	0.0999144	0.00166294	0.000617464
S5_060	Chinese_cohort_V1	292878	8373	1505	0.0228904	0.00101374	0.000192958
S5_061	Chinese_cohort_V1	622353	9172	39107	0.0486411	0.00111048	0.00501395
S5_062	Chinese_cohort_V1	356660	1773	10423	0.0278754	0.000214662	0.00133634
S5_064	Chinese_cohort_V1	543710	2051	4811	0.0424946	0.000248321	0.000616823
S5_066	Chinese_cohort_V1	22113766	5189	3908	1.72834	0.000628247	0.000501049
S5_068	Chinese_cohort_V1	339330	1204	5947	0.0265209	0.000145772	0.000762471
S5_070	Chinese_cohort_V1	2642	0	0	0.00020649	0	0
S5_071	Chinese_cohort_V1	234341	67171	10208	0.0183153	0.00813259	0.00130878
S5_072	Chinese_cohort_V1	511419	19516	3912	0.0399708	0.00236286	0.000501562
S5_073	Chinese_cohort_V1	861317	4531	19258	0.0673177	0.000548581	0.00246909
S5_074	Chinese_cohort_V1	316332	10960	9830	0.0247235	0.00132696	0.00126031
S5_075	Chinese_cohort_V1	2136691	3241	52242	0.166997	0.000392397	0.006698
S5_076	Chinese_cohort_V1	853967	5902	7508	0.0667433	0.000714572	0.000962608
S5_077	Chinese_cohort_V1	932831	4065	3896	0.072907	0.000492161	0.00049951
S5_078	Chinese_cohort_V1	1051881	2025	5115	0.0822116	0.000245173	0.000655799
S5_080	Chinese_cohort_V1	359740	1505	6620	0.0281161	0.000182215	0.000848757
S5_082	Chinese_cohort_V1	1481198	5048	602	0.115766	0.000611176	7.7183e-05
S5_083	Chinese_cohort_V1	2277814	2076	0	0.178026	0.000251347	0
S5_084_merged	Chinese_cohort_V1	740637	119740	25140	0.0578858	0.0144973	0.00322322
S5_085	Chinese_cohort_V1	574812	3666	89099	0.0449254	0.000443853	0.0114235
S5_086	Chinese_cohort_V1	1689921	3192	62265	0.132079	0.000386465	0.00798306
S5_087	Chinese_cohort_V1	485357	5879	6620	0.0379339	0.000711788	0.000848757
S5_088	Chinese_cohort_V1	1059190	15614	6319	0.0827828	0.00189043	0.000810165
S5_089	Chinese_cohort_V1	316364	14456	9629	0.024726	0.00175023	0.00123454
S5_091	Chinese_cohort_V1	106250	8090	4210	0.00830415	0.00097948	0.000539768
S5_092	Chinese_cohort_V1	854777	64219	1505	0.0668066	0.00777518	0.000192958
S5_093	Chinese_cohort_V1	275096	129286	52737	0.0215006	0.015653	0.00676146
S5_094_merged	Chinese_cohort_V1	86397	9914	903	0.00675251	0.00120032	0.000115775
S5_096	Chinese_cohort_V1	194451	48899	903	0.0151977	0.00592034	0.000115775
S5_098	Chinese_cohort_V1	1207894	11910	2106	0.094405	0.00144198	0.000270012
S5_099	Chinese_cohort_V1	460937	427773	9877	0.0360253	0.0517917	0.00126634
S5_101	Chinese_cohort_V1	702906	1000032	15184	0.0549368	0.121077	0.00194676
S5_104	Chinese_cohort_V1	242608	41968	1162	0.0189614	0.00508119	0.000148981
S6_001	Chinese_cohort_V1	212100	32491	6118	0.016577	0.00393378	0.000784395
S6_002	Chinese_cohort_V1	171400	7415	0	0.0133961	0.000897756	0
S6_003_merged	Chinese_cohort_V1	338355	3611	601	0.0264447	0.000437194	7.70548e-05
S6_004	Chinese_cohort_V1	319430	16423	2107	0.0249656	0.00198838	0.000270141
S6_005	Chinese_cohort_V1	138249	4769	4166	0.0108051	0.000577397	0.000534127
S6_006	Chinese_cohort_V1	253253	2086	3547	0.0197934	0.000252558	0.000454764
S6_007	Chinese_cohort_V1	547848	1204	4784	0.042818	0.000145772	0.000613362
S6_008	Chinese_cohort_V1	222685	8460	12319	0.0174043	0.00102428	0.00157943
S6_009	Chinese_cohort_V1	575892	10483	2708	0.0450098	0.00126921	0.000347195
S6_010	Chinese_cohort_V1	253284	13782	8125	0.0197958	0.00166863	0.00104171
S6_011	Chinese_cohort_V1	256934	9921	1806	0.0200811	0.00120116	0.000231549
S6_012	Chinese_cohort_V1	212213	2297	1505	0.0165859	0.000278105	0.000192958
S6_013	Chinese_cohort_V1	83076	602	1505	0.00649295	7.28859e-05	0.000192958
S6_014	Chinese_cohort_V1	366871	263006	2408	0.0286734	0.0318429	0.000308732
S6_015	Chinese_cohort_V1	309047	3543	2656	0.0241541	0.000428961	0.000340528
S6_016	Chinese_cohort_V1	317110	2018	902	0.0247843	0.000244325	0.000115646
S6_017	Chinese_cohort_V1	158838	60292	602	0.0124143	0.00729973	7.7183e-05
S6_018	Chinese_cohort_V1	263477	9022	5089	0.0205925	0.00109232	0.000652466
S6_019	Chinese_cohort_V1	1645334	2601	2408	0.128594	0.000314911	0.000308732
S6_020	Chinese_cohort_V1	130699	14947	3260	0.010215	0.00180968	0.000417968
S6_021	Chinese_cohort_V1	283295	2408	6019	0.0221414	0.000291544	0.000771702
S6_022	Chinese_cohort_V1	247555	3309	5112	0.0193481	0.00040063	0.000655415
S6_023	Chinese_cohort_V1	2009505	2008	1204	0.157056	0.000243114	0.000154366
S6_024	Chinese_cohort_V1	488701	9631	4214	0.0381953	0.00116605	0.000540281
S6_025	Chinese_cohort_V1	161309	26878	602	0.0126074	0.0032542	7.7183e-05
S6_026	Chinese_cohort_V1	94500	2028	9931	0.00738581	0.000245536	0.00127326
S6_027	Chinese_cohort_V1	171262	20212	2407	0.0133853	0.00244713	0.000308604
S6_028	Chinese_cohort_V1	1021257	18568	1505	0.0798181	0.00224808	0.000192958
S6_029	Chinese_cohort_V1	1240680	11792	24971	0.0969675	0.00142769	0.00320156
S6_030	Chinese_cohort_V1	557845	56734	71153	0.0435993	0.00686895	0.0091226
S6_031	Chinese_cohort_V1	785366	20856	2998	0.0613816	0.0025251	0.000384377
S6_032	Chinese_cohort_V1	296194	8585	11133	0.0231495	0.00103941	0.00142737
S6_033	Chinese_cohort_V1	259094	13868	18240	0.0202499	0.00167904	0.00233857
S6_035	Chinese_cohort_V1	96414	1464	4501	0.0075354	0.000177251	0.000577078
